# Supplementary material
Source: PubMed Central journal article supplement (PMC4747430)
Supplement: NIHMS745822-supplement-Supp_Materials.pdf [file NIHMS745822-supplement-Supp_Materials.pdf]

|                 | UK1                               | UK2                                   | Scotland1                             | Scotland2                             | VQ58                                  |
|-----------------|-----------------------------------|---------------------------------------|---------------------------------------|---------------------------------------|---------------------------------------|
| <b>pre-QC</b>   | <b>940 cases<br/>965 controls</b> | <b>2,873 cases<br/>2,871 controls</b> | <b>1,012 cases<br/>1,012 controls</b> | <b>2,057 cases<br/>2,111 controls</b> | <b>1,800 cases<br/>2,690 controls</b> |
| Call rate       | 15                                | 30                                    | 15                                    | 22                                    | 0                                     |
| Ethnicity       | 54                                | 6                                     | 9                                     | 7                                     | 0                                     |
| Relatedness     | 26                                | 197*                                  | 9                                     | 30*                                   | 9                                     |
| Sex discrepancy | 3                                 | 45                                    | 15                                    | 22                                    | 1                                     |
| Other           | 17                                | 9                                     | 5                                     | 5                                     | 0                                     |
| <b>post-QC</b>  | <b>890 cases<br/>900 controls</b> | <b>2,659 cases<br/>2,798 controls</b> | <b>973 cases<br/>998 controls</b>     | <b>2,007 cases<br/>2,075 controls</b> | <b>1,794 cases<br/>2,686 controls</b> |

**Supplementary Figure 1: Details of the quality control filters applied to each GWAS.** Samples were excluded - call rate (<95%), Ethnicity (principle components analysis or self-reported not to be of European descent), relatedness (duplicates or related within or between each case-control series), sex discrepancy, other (cases found to carry a high-risk CRC mutation, controls with a 1<sup>st</sup> degree relative with CRC, low concordance of genotypes in duplicates, subjects withdrawn from the study). \*samples preferentially removed from these data-sets over GWAS datasets.

**Supplementary Figure 2: Quantile-Quantile (Q-Q) plots of observed and expected  $\chi^2$  values of association between SNP genotype and colorectal cancer risk. (a) UK1, (b) Scotland1, (c) UK2, (d) Scotland2 and (e) VQ58**

(a)

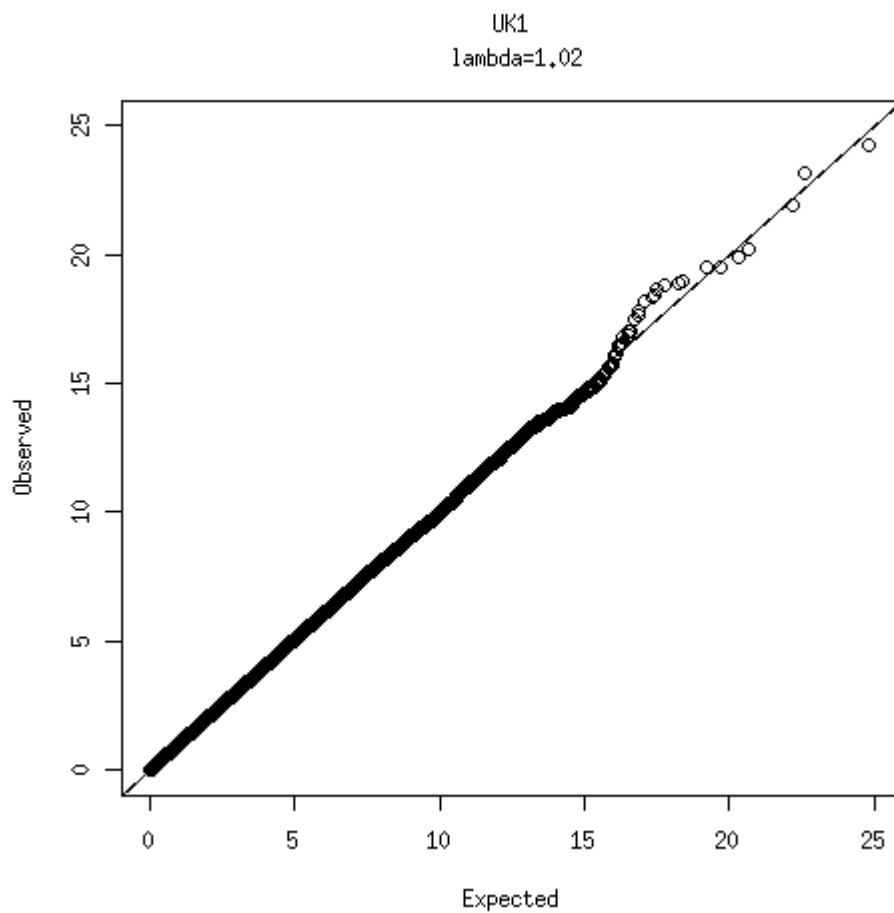

(b)

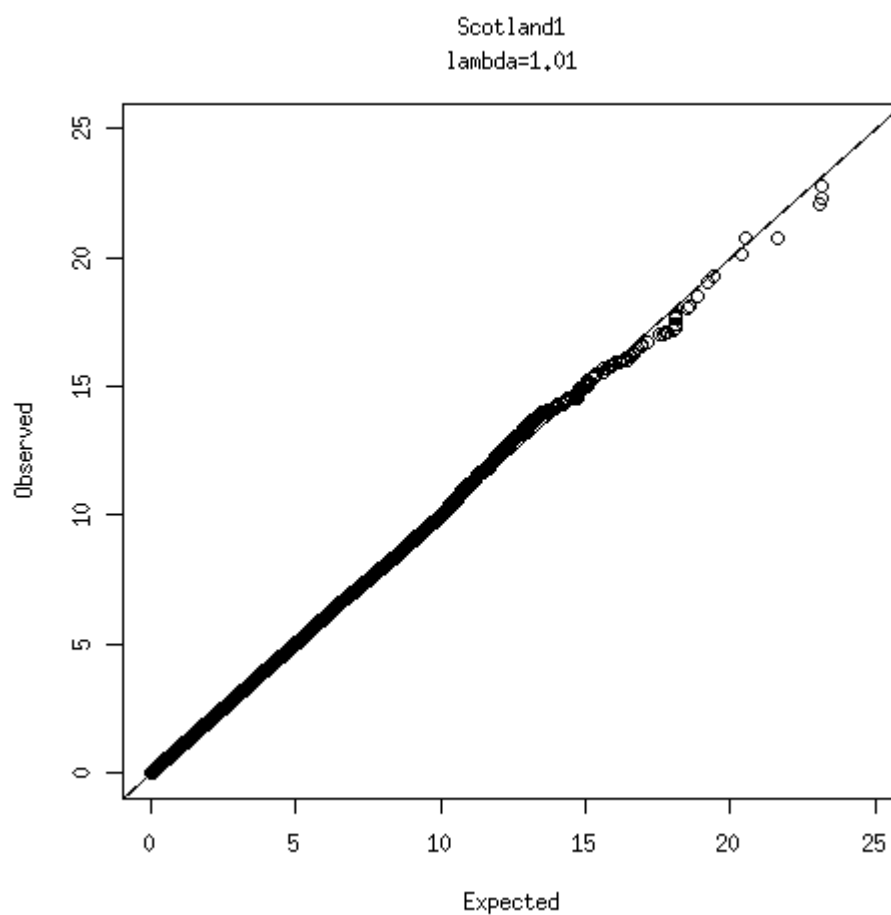

(c)

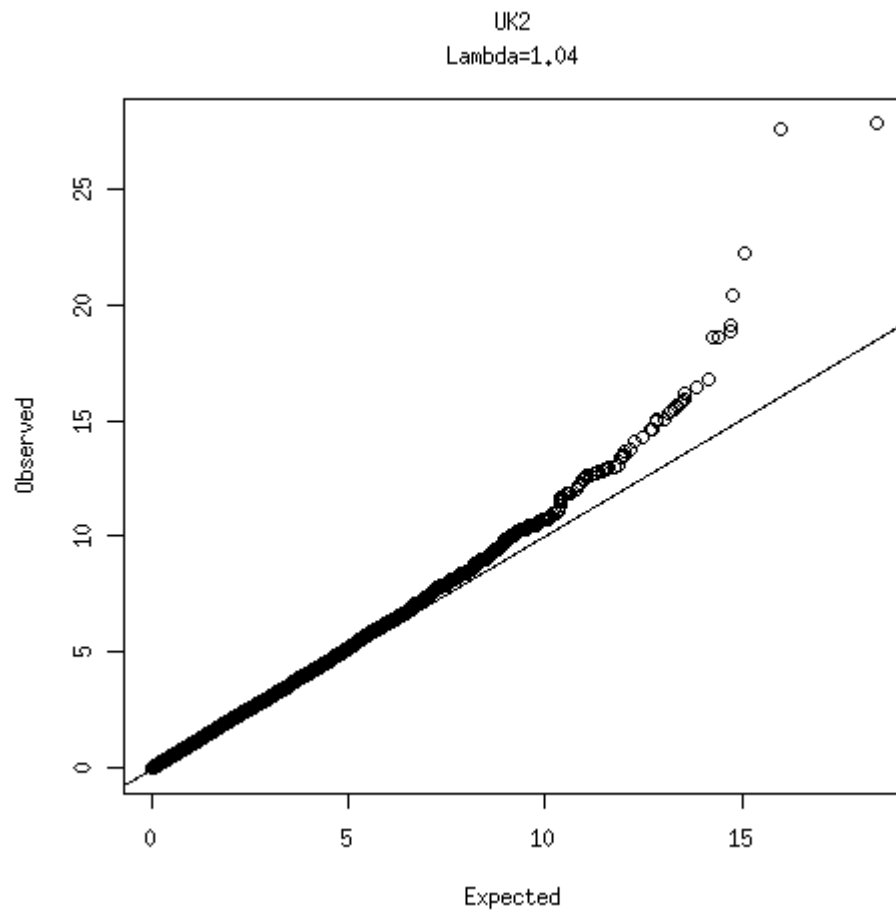

(d)

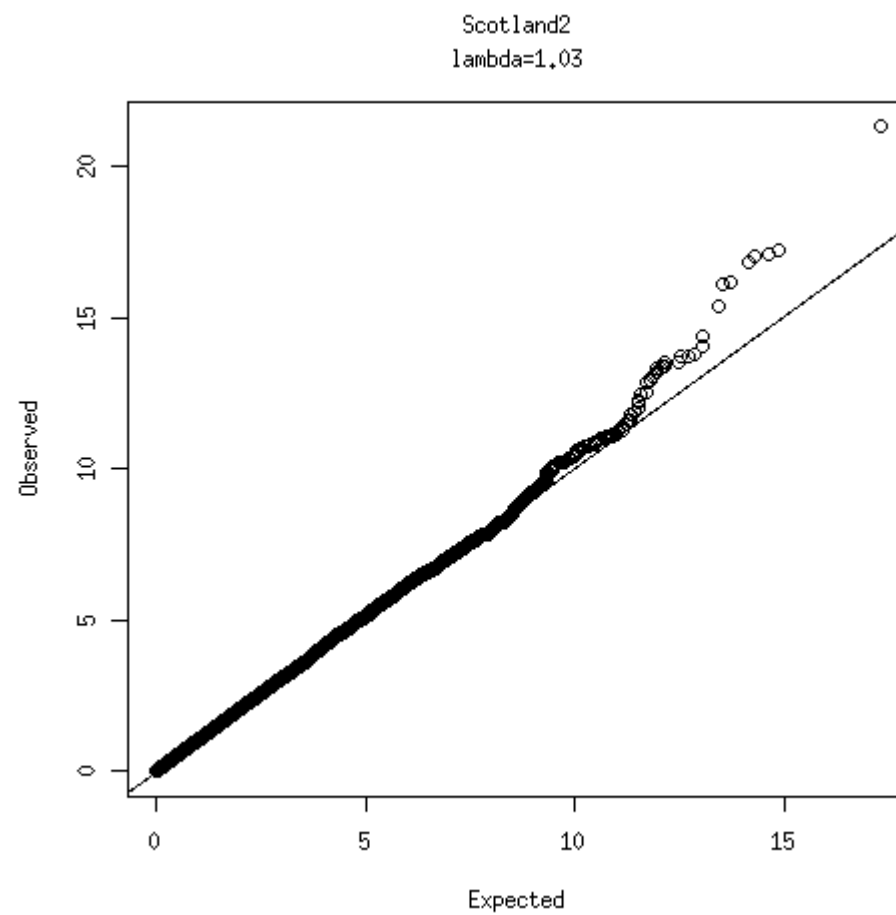

(e)

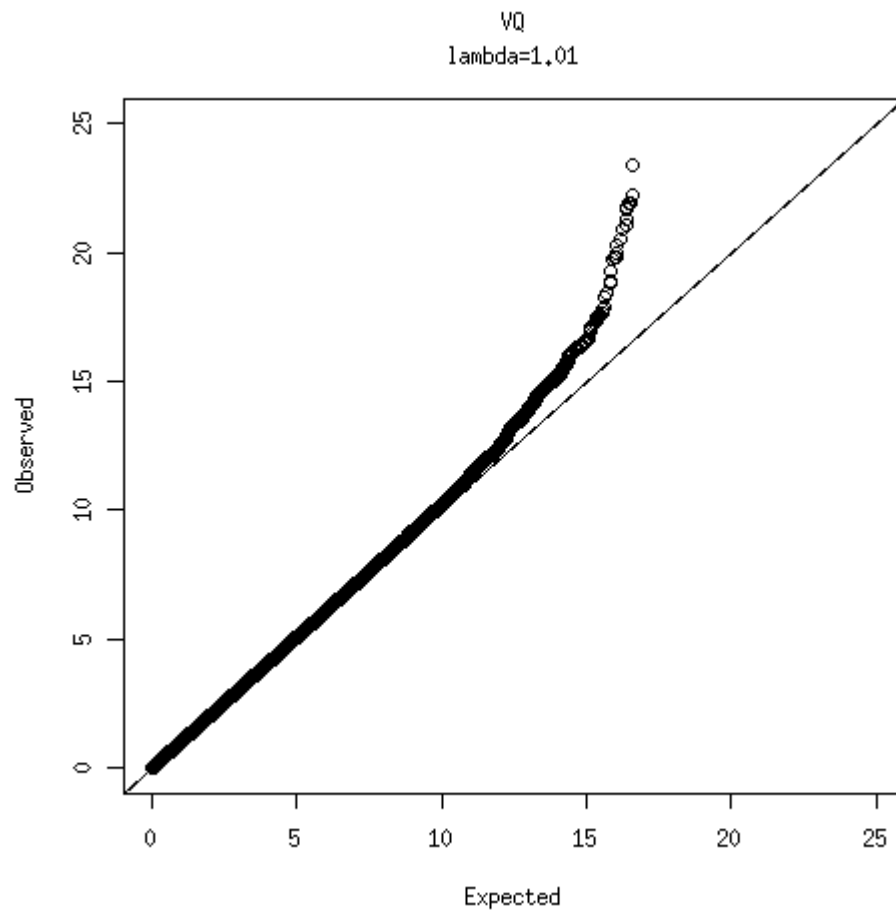

**Supplementary Figure 3: Identification of individuals in the GWAS of non-European ancestry in cases and controls.** The first two principal components of the analysis are plotted, before exclusions, for the (a) UK1, (b) UK2, (c) Scotland1, (d) Scotland2 and (e) VQ58 cases and controls. HapMap CEU individuals are plotted in blue; CHB+JPT individuals are plotted in green; YRI individuals are plotted in red; GWAS cases are plotted as circles and controls as triangles.

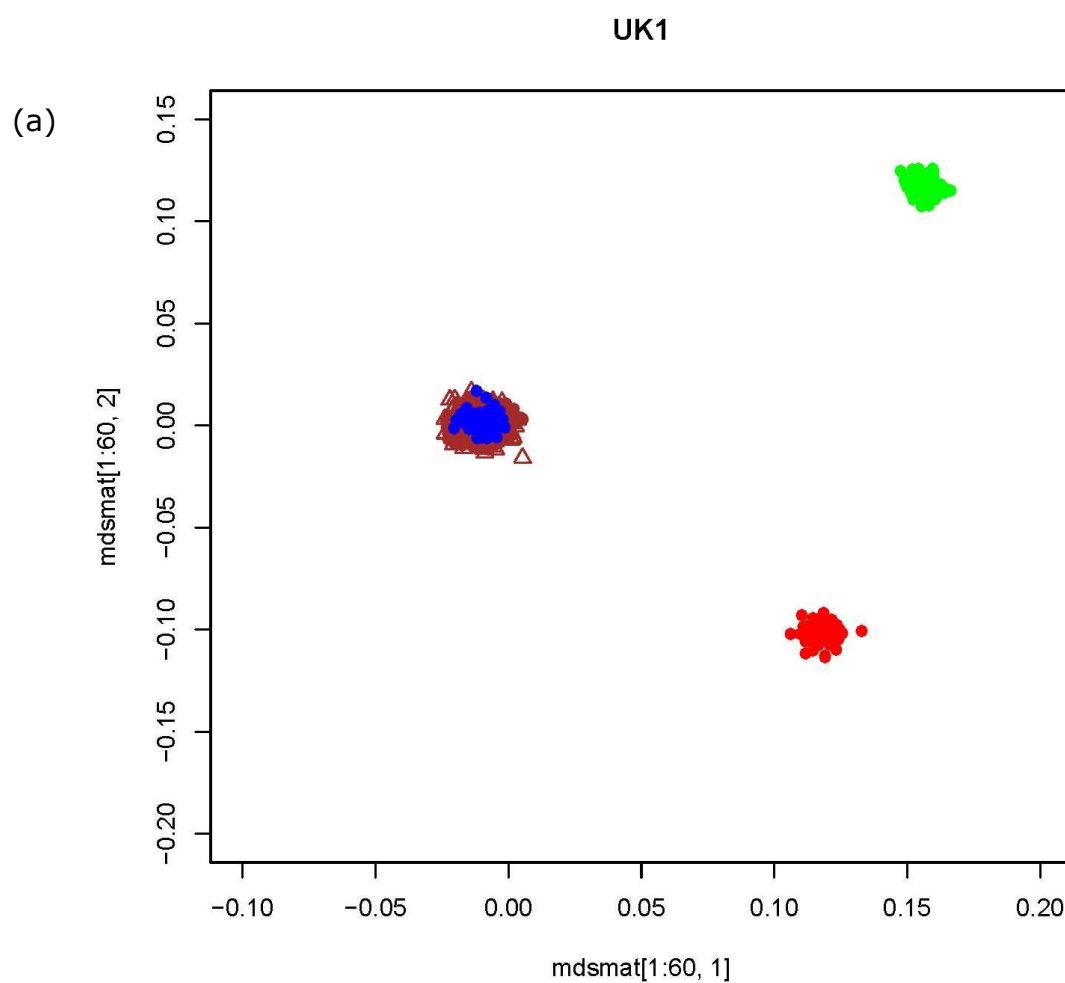

(b)

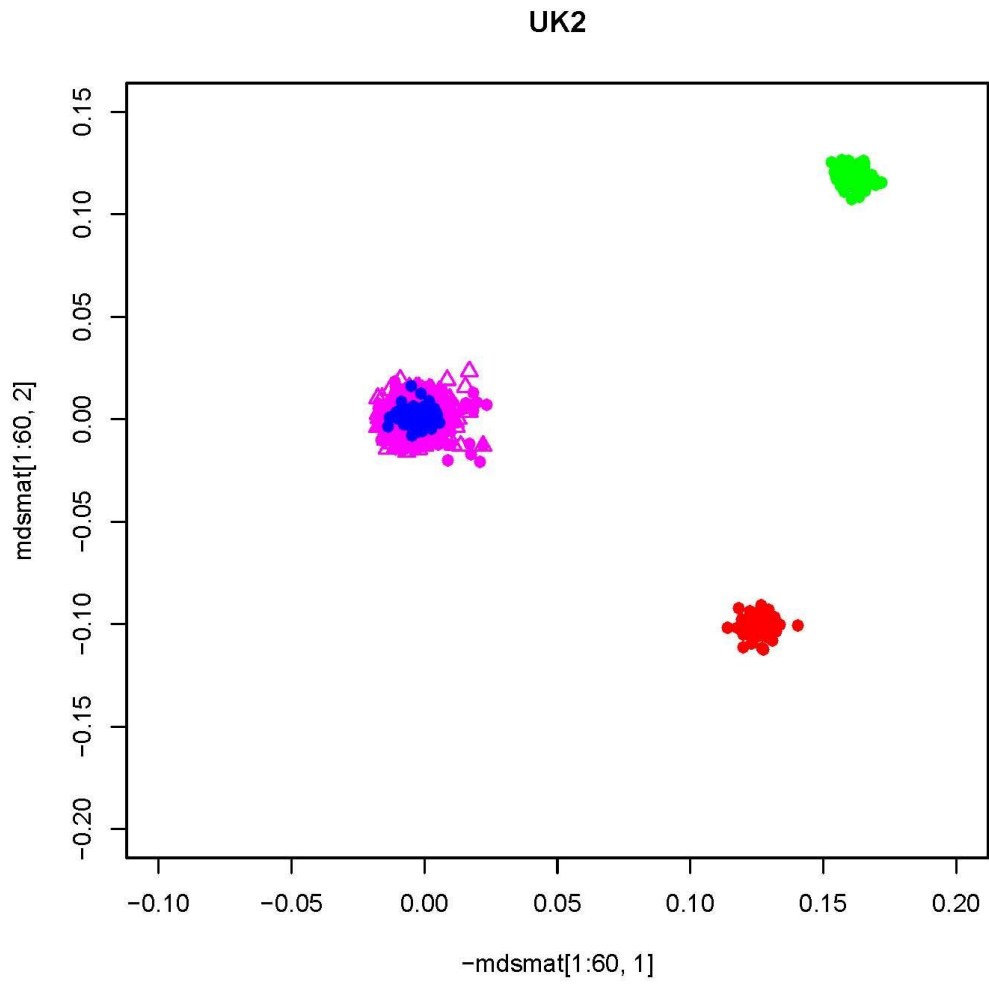

(c)

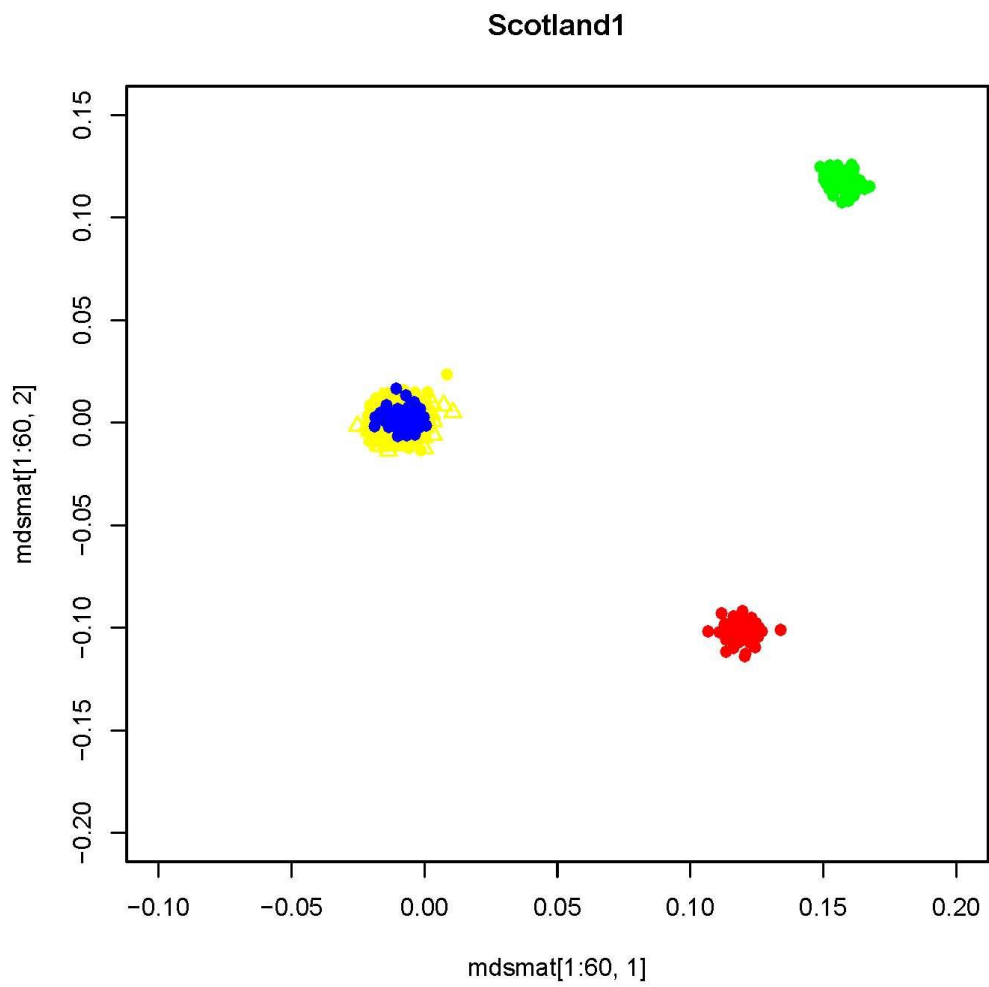

(d)

Scotland2

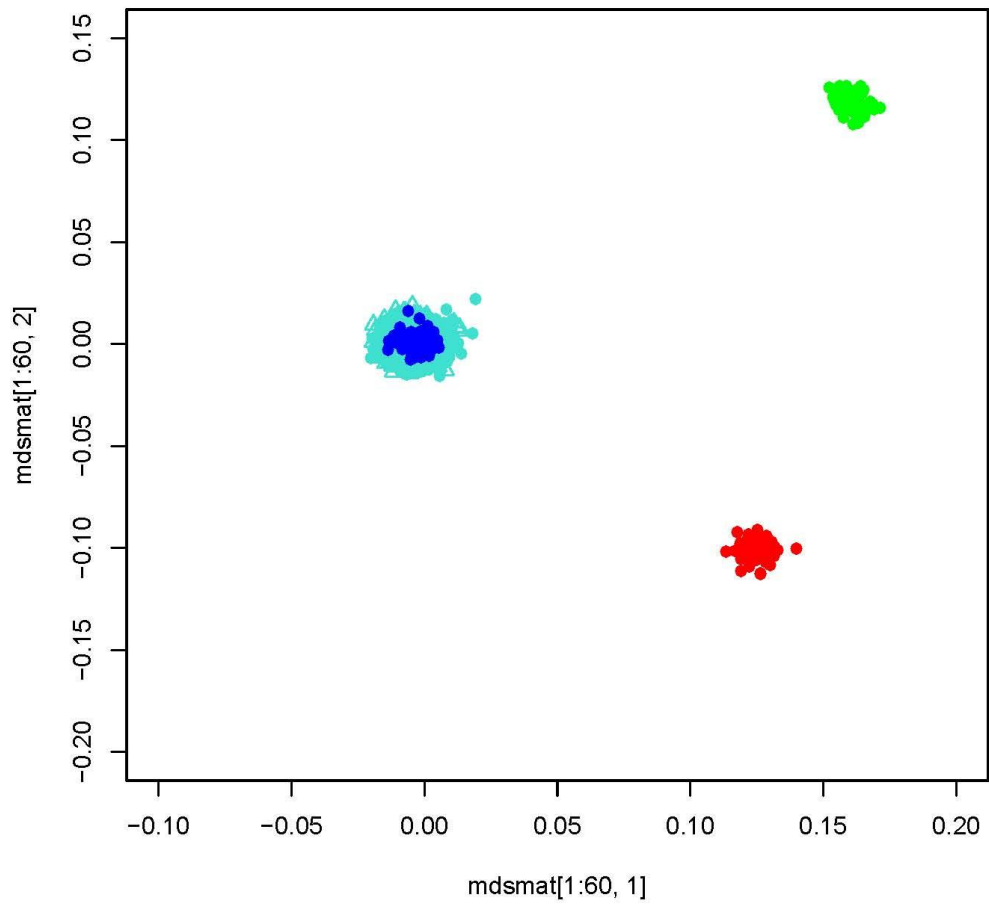

(e)

VQ58

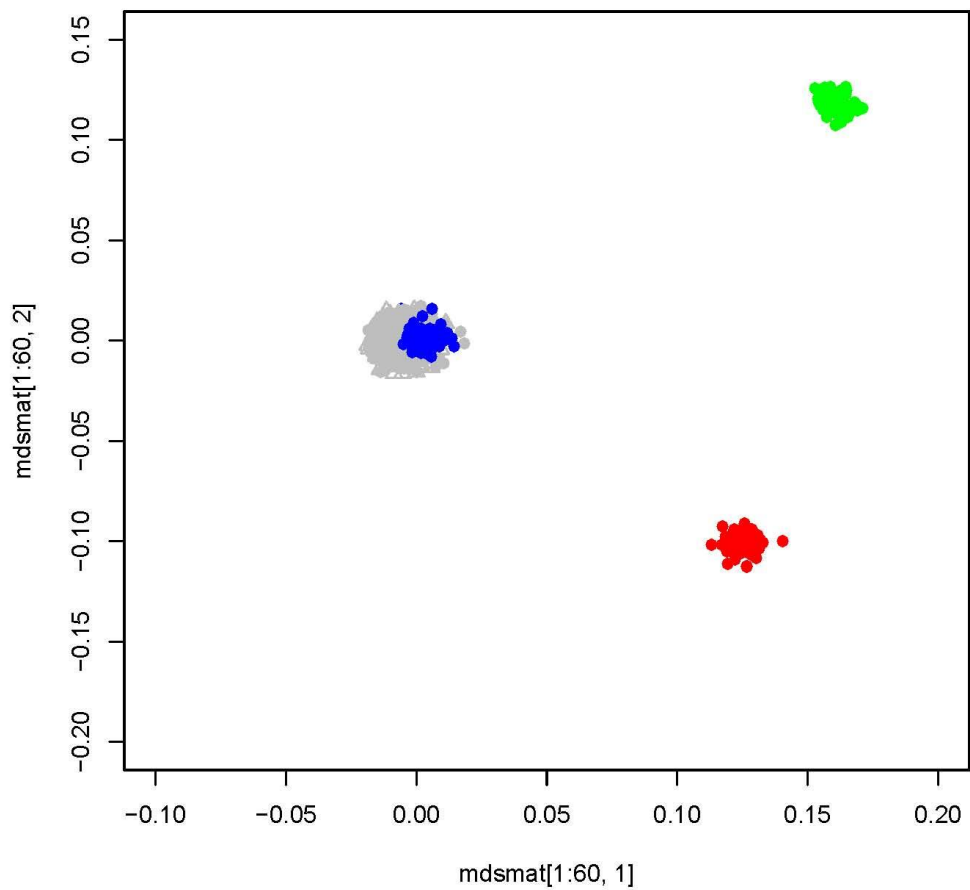

**Supplementary Figure 4 : Relationship between rs5934683 genotype and *SHROOM2* expression.** Differences in the distribution of expression by SNP (a) 154 CRCs from The Cancer Genome Atlas (TCGA) project, (b-c) 42 colon tissue samples, (b) females and (c) males.

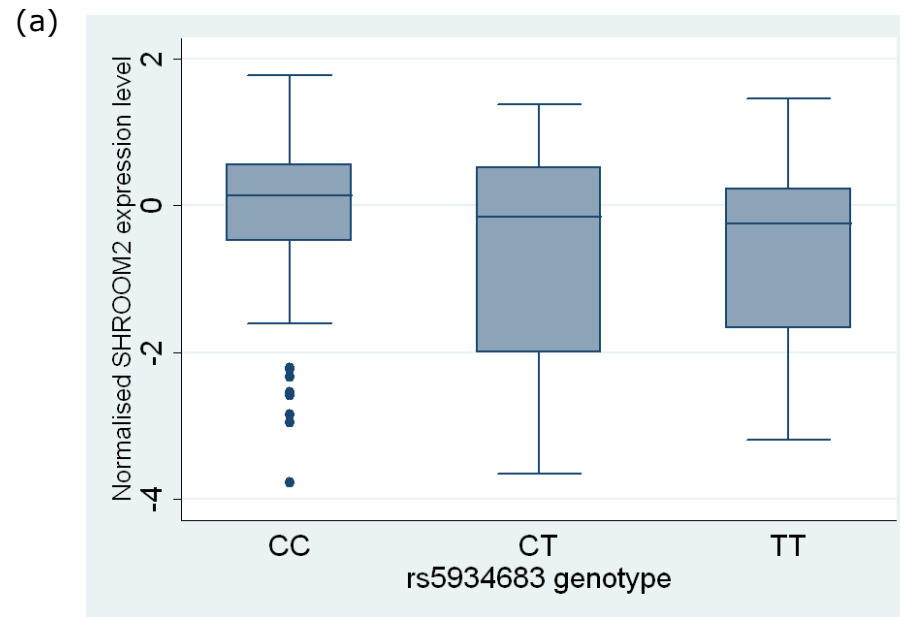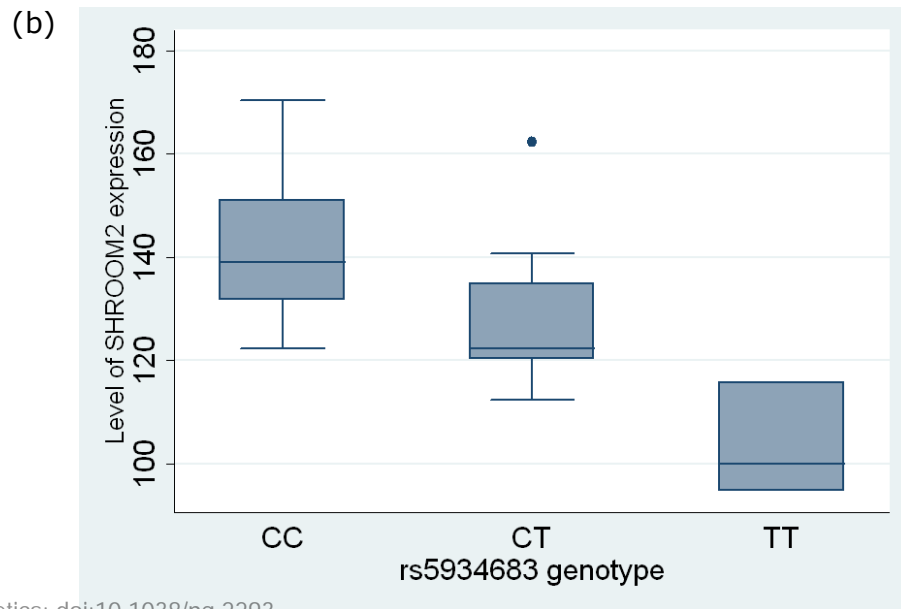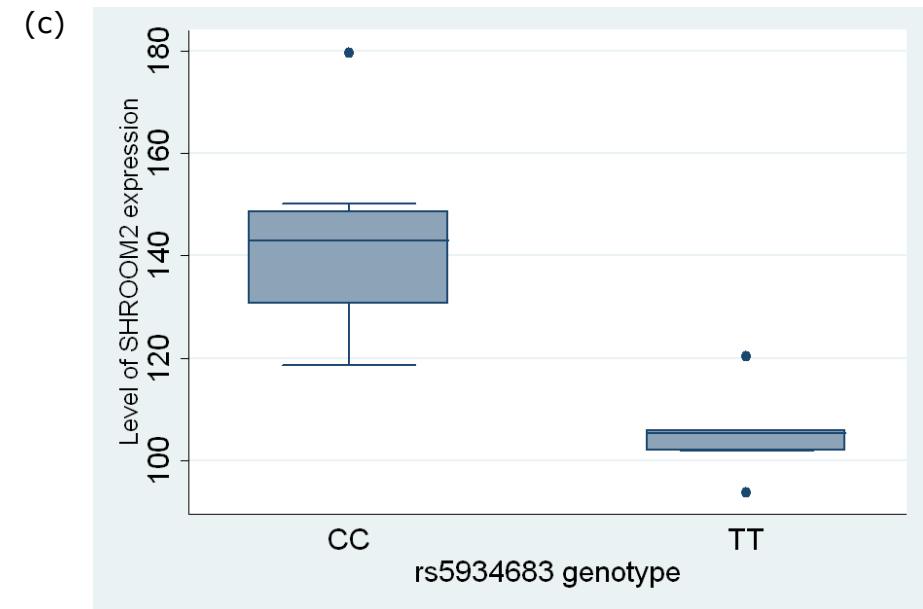



**Supplementary Table 1: Summary of the sample sets used in the study.**

| Series                  | Study setting                                                                                                                                                                                                                                                                                                                                                                                                                                                    | Study centre                      | Sampling                                                                                                                                                                                                                                                                   | Genotyping platform                                                              | No. cases    | No. controls |
|-------------------------|------------------------------------------------------------------------------------------------------------------------------------------------------------------------------------------------------------------------------------------------------------------------------------------------------------------------------------------------------------------------------------------------------------------------------------------------------------------|-----------------------------------|----------------------------------------------------------------------------------------------------------------------------------------------------------------------------------------------------------------------------------------------------------------------------|----------------------------------------------------------------------------------|--------------|--------------|
| <b>GWAS studies</b>     |                                                                                                                                                                                                                                                                                                                                                                                                                                                                  |                                   |                                                                                                                                                                                                                                                                            |                                                                                  |              |              |
| UK1                     | CORGI (Colorectal Tumour Gene Identification Consortium)                                                                                                                                                                                                                                                                                                                                                                                                         | Oxford University                 | Cases enriched for family history of CRC ascertained through clinical genetics centres in the UK. Spouse controls with no personal family history of CRC.                                                                                                                  | Illumina HumanHap550                                                             | 940          | 965          |
| UK2                     | NSCCG (National study of Colorectal Cancer). <a href="http://www.icr.ac.uk/research/research_divisions/Genetics_and_Epidemiology/index.shtml">http://www.icr.ac.uk/research/research_divisions/Genetics_and_Epidemiology/index.shtml</a>                                                                                                                                                                                                                         | Institute of Cancer Research      | Population-based UK study. Spouse controls from NSCCG and GELCAPS (Genetic Lung Cancer Predisposition Study).                                                                                                                                                              | Illumina iSelect and Goldengate                                                  | 2,873        | 2,871        |
| SCOTLAND1               | COGS (Colorectal Cancer Genetics Susceptibility Study)                                                                                                                                                                                                                                                                                                                                                                                                           | Edinburgh University              | Population-based incident case series aged <55 at diagnosis; Scotland. Population-based controls frequency matched by area of residence within Scotland                                                                                                                    | Illumina HumanHap300<br>Illumina HumanHap240S                                    | 1,012        | 1,012        |
| SCOTLAND2               | SOCCS (Scottish Colorectal Cancer Study)                                                                                                                                                                                                                                                                                                                                                                                                                         | Edinburgh University              | Population-based incident case series; Scotland. Population-based controls frequency matched by area of residence within Scotland.                                                                                                                                         | Illumina iSelect and Goldengate                                                  | 2,057        | 2,111        |
| VQ58                    | Cases: VICTOR, post treatment stage of a phase III, randomised controlled trial of rofecoxib (VIOXX) in CRC patients after potentially curative therapy. QUASAR2, multicentre study if capecitabine +/- bevacizumab as adjuvant CRC treatment. <a href="http://www.octo-oxford.org.uk/alltrials">http://www.octo-oxford.org.uk/alltrials</a> . Controls: 58BC (UK 1958 Birth Cohort) <a href="http://www.b58cgene.sgul.ac.uk">http://www.b58cgene.sgul.ac.uk</a> | Oxford University                 | Cases recruited as a clinical-based series and controls as population-based series.                                                                                                                                                                                        | Illumina HumanHap300<br>Illumina HumanHap370<br>Illumina Human 1.2MDuo Custom_V1 | 1,800        | 2,690        |
| <b>TOTAL</b>            | <b>GWAS Sets</b>                                                                                                                                                                                                                                                                                                                                                                                                                                                 |                                   |                                                                                                                                                                                                                                                                            |                                                                                  | <b>8,682</b> | <b>9,649</b> |
| <b>Non-GWAS studies</b> |                                                                                                                                                                                                                                                                                                                                                                                                                                                                  |                                   |                                                                                                                                                                                                                                                                            |                                                                                  |              |              |
| COINBNS                 | COIN, COIN-B <a href="http://public.ukcrn.org.uk">http://public.ukcrn.org.uk</a><br>NBS UK National Blood Service Blood Donor samples) <a href="http://www.wtccc.org.uk">http://www.wtccc.org.uk</a>                                                                                                                                                                                                                                                             | University of Cardiff             | Multicentre study of cetuximab and other therapies in metastatic CRC. Controls were unselected UK blood donors                                                                                                                                                             | Illumina Goldengate<br>Illumina Human 1.2MDuo Custom_V1                          | 2,183        | 2,501        |
| CCFR1                   | CCFR (Colon Cancer Family Registry) <a href="http://epi.grants.cancer.gov/CFR">http://epi.grants.cancer.gov/CFR</a>                                                                                                                                                                                                                                                                                                                                              | University of Southern California | Recently diagnosed CRC cases reported to population complete cancer registries in the USA (Seattle Familial Colorectal Cancer Registry), Canada (Ontario Familial Cancer Registry) and Australia (Australasian Colorectal Cancer Family Study). Population based controls. | Illumina HumanHap 550                                                            | 1,290        | 1,055        |

|              |                                                                                                                                                                                                                                             |                                                         |                                                                                                                                                           |                                               |               |               |
|--------------|---------------------------------------------------------------------------------------------------------------------------------------------------------------------------------------------------------------------------------------------|---------------------------------------------------------|-----------------------------------------------------------------------------------------------------------------------------------------------------------|-----------------------------------------------|---------------|---------------|
| UK3          | NSCCG (National study of Colorectal Cancer).<br><a href="http://www.icr.ac.uk/research/research_divisions/Genetics_and_Epidemiology/index.shtml">http://www.icr.ac.uk/research/research_divisions/Genetics_and_Epidemiology/index.shtml</a> | Institute of Cancer Research                            | Population-based UK study. Spouse controls from NSCCG and GELCAPS (Genetic Lung Cancer Predisposition Study).                                             | KASPar                                        | 7,862         | 4,431         |
| UK4          | CORGI (Colorectal Tumour Gene Identification Consortium)                                                                                                                                                                                    | Oxford University                                       | Cases enriched for family history of CRC ascertained through clinical genetics centres in the UK. Spouse controls with no personal family history of CRC. | KASPar                                        | 589           | 1,087         |
| SCOTLAND3    | SOCCS3 Study                                                                                                                                                                                                                                | Edinburgh University                                    | CRC cases arising within the Lothian region of Scotland. Cancer free population controls from Lothian born 1921 and 1936 (LBC1921 and LBC1936).           | Taqman                                        | 736           | 1,522         |
| CAMBRIDGE    | UKSEARCH (Studies of Epidemiology and Risk Factors in Cancer Heredity)<br><a href="http://www.srl.cam.ac.uk/search">http://www.srl.cam.ac.uk/search</a>                                                                                     | Cambridge University                                    | Population-based case-control study                                                                                                                       | Kaspar                                        | 2,248         | 2,288         |
| CROATIA      | Croatian Colorectal Cancer Genetic Study                                                                                                                                                                                                    | University Hospital Centre 'Sestre milosrdnice', Zagreb | Hospital based recruited from University Hospital in Zagreb, Croatia. Urban Croatian population from Split, Croatia.                                      | Taqman                                        | 375           | 1,051         |
| HELSINKI     | FCCPS (Finnish Colorectal Cancer Predisposition Study)<br><a href="http://research.med.helsinki.fi/gsb/aaltonen">http://research.med.helsinki.fi/gsb/aaltonen</a>                                                                           | University of Helsinki, Finland                         | Population-based study, south-eastern Finland                                                                                                             | KASPar                                        | 1,013         | 827           |
| SWEDEN       | Swedish Low Risk Colorectal Cancer Study                                                                                                                                                                                                    | Karolinska Institute                                    | Cases ascertained from 14 different surgical clinics in Sweden between 2004 and 2006. Controls were blood donors or healthy volunteers from Uppsala.      | Taqman                                        | 3,217         | 2,895         |
| JAPAN        | Biobank Japan project                                                                                                                                                                                                                       | The University of Tokyo                                 | Cases and controls were ascertained from 66 hospitals in Japan. Controls included subjects with non-cancer diseases or healthy volunteers.                | Illumina Human 10Quad, Illumina HumanHap550v3 | 1,583         | 1,898         |
| <b>TOTAL</b> | <b>Non-GWAS Studies</b>                                                                                                                                                                                                                     |                                                         | <b>Various populations</b>                                                                                                                                |                                               | <b>21,096</b> | <b>19,555</b> |
| <b>TOTAL</b> | <b>COMBINED STUDIES</b>                                                                                                                                                                                                                     |                                                         |                                                                                                                                                           |                                               | <b>29,778</b> | <b>29,204</b> |

**Supplementary Table 2: Summary results for the SNPS: rs1321311 (6p21), rs3824999 (11q13.4) and rs5934683 (Xp22.2) associated with CRC risk.** <sup>a</sup>Risk allele frequency (RAF), genotype counts are given in brackets. <sup>b</sup>Odds ratio. <sup>c</sup>95% Confidence Interval.

**rs1321311 (6p21.31)**

| STUDY           | Cases                           | Controls             | OR <sup>b</sup> | 95% CI <sup>c</sup> | P-value                      |
|-----------------|---------------------------------|----------------------|-----------------|---------------------|------------------------------|
|                 | RAF <sup>a</sup> (AA / AC / CC) | RAF (AA / AC / CC)   |                 |                     |                              |
| UK1             | 0.26 (53/363/473)               | 0.23 (49/317/534)    | 1.20            | 1.03-1.40           | 2.00x10 <sup>-2</sup>        |
| UK2             | 0.25 (169/970/1519)             | 0.23 (149/996/1652)  | 1.08            | 0.99-1.18           | 7.23x10 <sup>-2</sup>        |
| SCOTLAND1       | 0.25 (65/356/552)               | 0.22 (53/331/614)    | 1.18            | 1.02-1.37           | 2.45x10 <sup>-2</sup>        |
| SCOTLAND2       | 0.24 (109/741/1157)             | 0.23 (110/736/1229)  | 1.05            | 0.95-1.16           | 3.60x10 <sup>-1</sup>        |
| VQ58            | 0.24 (108/634/1052)             | 0.23 (141/955/1588)  | 1.04            | 0.94-1.14           | 4.80x10 <sup>-1</sup>        |
| COINNBS         | 0.25 (135/810/1201)             | 0.23 (128/892/1481)  | 1.13            | 1.03-1.24           | 1.26x10 <sup>-2</sup>        |
|                 |                                 |                      | <b>1.09</b>     | <b>1.05-1.14</b>    | <b>4.79 x10<sup>-5</sup></b> |
| CCFR1           | 0.27 (89/449/644)               | 0.24 (65/352/575)    | 1.12            | 0.98-1.28           | 9.83x10 <sup>-2</sup>        |
| UK3             | 0.24 (449/2836/4368)            | 0.23 (227/1531/2541) | 1.08            | 1.01-1.14           | 2.26x10 <sup>-2</sup>        |
| UK4             | 0.23 (29/217/343)               | 0.24 (35/264/397)    | 0.96            | 0.8-1.16            | 6.94x10 <sup>-1</sup>        |
| SCOTLAND3       | 0.25 (49/267/404)               | 0.23 (82/535/905)    | 1.14            | 0.98-1.31           | 8.17x10 <sup>-2</sup>        |
| CAMBRIDGE       | 0.25 (143/826/1279)             | 0.23 (116/789/1338)  | 1.11            | 1.01-1.23           | 2.86x10 <sup>-2</sup>        |
| CROATIA         | 0.27 (25/156/194)               | 0.25 (67/374/594)    | 1.16            | 0.96-1.41           | 1.16x10 <sup>-1</sup>        |
| HELSINKI        | 0.21 (44/334/621)               | 0.17 (20/245/550)    | 1.27            | 1.07-1.50           | 5.63x10 <sup>-3</sup>        |
| SWEDEN          | 0.22 (132/1092/1900)            | 0.21 (128/872/1705)  | 1.05            | 0.96-1.15           | 2.61x10 <sup>-1</sup>        |
|                 |                                 |                      | <b>1.09</b>     | <b>1.06-1.13</b>    | <b>1.12x10<sup>-9</sup></b>  |
| JAPAN           | 0.14 (26/390/1167)              | 0.12 (38/380/1479)   | 1.18            | 1.03-1.36           | 1.71x10 <sup>-2</sup>        |
|                 |                                 |                      |                 |                     |                              |
| <b>Combined</b> |                                 |                      | <b>1.10</b>     | <b>1.07-1.13</b>    | <b>1.14x10<sup>-10</sup></b> |

**rs3824999 (11q13.4)**

| STUDY           | Cases                           | Controls              | OR <sup>d</sup> | 95% CI <sup>c</sup> | P-value                      |
|-----------------|---------------------------------|-----------------------|-----------------|---------------------|------------------------------|
|                 | RAF <sup>a</sup> (AA / AC / CC) | RAF (AA / AC / CC)    |                 |                     |                              |
| UK1             | 0.53 (194/443/253)              | 0.50 (231/438/231)    | 1.14            | 1.00-1.30           | 4.90x10 <sup>-2</sup>        |
| UK2             | 0.52 (624/1310/724)             | 0.50 (699/1423/676)   | 1.10            | 1.02-1.18           | 1.66x10 <sup>-2</sup>        |
| SCOTLAND1       | 0.53 (216/489/268)              | 0.50 (244/516/238)    | 1.13            | 1.00-1.28           | 5.94x10 <sup>-2</sup>        |
| SCOTLAND2       | 0.50 (505/998/504)              | 0.51 (486/1045/544)   | 0.94            | 0.87-1.03           | 1.99x10 <sup>-1</sup>        |
| VQ58            | 0.53 (376/920/498)              | 0.49 (704/1318/653)   | 1.19            | 1.09-1.30           | 5.48x10 <sup>-5</sup>        |
| COINNBS         | 0.52 (519/1063/601)             | 0.50 (627/1241/633)   | 1.07            | 0.99-1.16           | 9.21x10 <sup>-2</sup>        |
|                 |                                 |                       | <b>1.08</b>     | <b>1.05-1.13</b>    | <b>1.77 x10<sup>-5</sup></b> |
| CCFR1           | 0.54 (241/606/326)              | 0.50 (242/510/247)    | 1.15            | 1.02-1.30           | 2.45x10 <sup>-2</sup>        |
| UK3             | 0.51 (1789/3857/2005)           | 0.51 (1061/2211/1117) | 1.03            | 0.98-1.09           | 2.46x10 <sup>-1</sup>        |
| UK4             | 0.52 (133/288/156)              | 0.50 (259/540/252)    | 1.10            | 0.95-1.27           | 2.00x10 <sup>-1</sup>        |
| SCOTLAND3       | 0.52 (162/373/195)              | 0.49 (385/774/361)    | 1.13            | 1.00-1.29           | 5.32x10 <sup>-2</sup>        |
| CAMBRIDGE       | 0.52 (499/1121/584)             | 0.51 (523/1074/560)   | 1.04            | 0.96-1.14           | 3.15x10 <sup>-1</sup>        |
| CROATIA         | 0.53 (80/188/101)               | 0.52 (239/536/276)    | 1.05            | 0.88-1.24           | 6.08x10 <sup>-1</sup>        |
| HELSINKI        | 0.48 (261/460/228)              | 0.48 (235/395/196)    | 1.02            | 0.90-1.17           | 7.16x10 <sup>-1</sup>        |
| SWEDEN          | 0.53 (741/1546/904)             | 0.49 (713/1509/673)   | 1.14            | 1.06-1.22           | 3.41x10 <sup>-4</sup>        |
|                 |                                 |                       | <b>1.08</b>     | <b>1.05-1.10</b>    | <b>1.65x10<sup>-9</sup></b>  |
| JAPAN           | 0.45 (490/761/331)              | 0.43 (630/908/360)    | 1.09            | 0.99-1.19           | 8.46x10 <sup>-2</sup>        |
|                 |                                 |                       |                 |                     |                              |
| <b>Combined</b> |                                 |                       | <b>1.08</b>     | <b>1.05-1.10</b>    | <b>3.65x10<sup>-10</sup></b> |

**rs5934683 (Xp22.2)**

| STUDY           | Cases                           |                      | Controls           |                      | OR <sup>b</sup> | 95% CI <sup>c</sup> | P-value                      |
|-----------------|---------------------------------|----------------------|--------------------|----------------------|-----------------|---------------------|------------------------------|
|                 | Male                            | Female               | Male               | Female               |                 |                     |                              |
|                 | RAF <sup>a</sup> (TT / CT / CC) | RAF (TT / CT / CC)   | RAF (TT / CT / CC) | RAF (TT / CT / CC)   |                 |                     |                              |
| UK1             | 0.37 (153/-/258)                | 0.38 (65/235/180)    | 0.30 (123/-/284)   | 0.31 (50/205/237)    | 1.23            | 1.10-1.38           | 3.32x10 <sup>-4</sup>        |
| UK2             | 0.36 (398/-/708)                | 0.35 (180/723/648)   | 0.35 (393/-/733)   | 0.33 (198/702/770)   | 1.05            | 0.99-1.13           | 1.23x10 <sup>-2</sup>        |
| SCOTLAND1       | 0.36 (177/-/317)                | 0.35 (57/226/196)    | 0.35 (181/-/331)   | 0.34 (55/219/212)    | 1.03            | 0.93-1.15           | 5.75x10 <sup>-1</sup>        |
| SCOTLAND2       | 0.38 (459/-/754)                | 0.35 (106/347/341)   | 0.34 (412/-/808)   | 0.35 (109/382/364)   | 1.07            | 1.00-1.15           | 6.44x10 <sup>-2</sup>        |
| VQ58            | 0.34 (299/-/592)                | 0.35 (64/245/223)    | 0.31 (427/-/958)   | 0.33 (132/586/581)   | 1.07            | 0.99-1.16           | 8.31x10 <sup>-2</sup>        |
|                 |                                 |                      |                    |                      | <b>1.08</b>     | <b>1.04-1.12</b>    | <b>8.19x10<sup>-5</sup></b>  |
| CCFR1           | 0.36 (218/-/392)                | 0.37 (77/267/220)    | 0.33 (158/-/320)   | 0.33 (49/245/227)    | 1.11            | 1.00-1.23           | 4.66x10 <sup>-2</sup>        |
| UK3             | 0.36 (1763/-/3097)              | 0.34 (318/1216/1178) | 0.31 (496/-/1089)  | 0.33 (297/1199/1243) | 1.11            | 1.06-1.16           | 1.87x10 <sup>-5</sup>        |
| UK4             | 0.39 (106/-/168)                | 0.34 (36/132/129)    | 0.35 (158/-/291)   | 0.32 (69/206/269)    | 1.10            | 0.97-1.25           | 1.38x10 <sup>-1</sup>        |
| SCOTLAND3       | 0.33 (138/-/278)                | 0.33 (34/129/133)    | 0.33 (233/-/477)   | 0.35 (87/383/327)    | 0.98            | 0.88-1.09           | 7.01x10 <sup>-1</sup>        |
| CAMBRIDGE       | 0.36 (443/-/804)                | 0.34 (104/423/395)   | 0.34 (304/-/591)   | 0.35 (160/572/535)   | 1.01            | 0.94-1.08           | 8.23x10 <sup>-1</sup>        |
| CROATIA         | 0.39 (68/-/106)                 | 0.36 (18/62/58)      | 0.41 (118/-/172)   | 0.34 (67/203/231)    | 1.04            | 0.89-1.21           | 6.48x10 <sup>-1</sup>        |
| HELSINKI        | 0.43 (182/-/246)                | 0.41 (70/197/144)    | 0.38 (159/-/257)   | 0.40 (86/111/158)    | 1.08            | 0.96-1.20           | 2.02x10 <sup>-1</sup>        |
| SWEDEN          | 0.34 (573/-/1099)               | 0.35 (204/601/632)   | 0.32 (423/-/894)   | 0.33 (144/632/624)   | 1.07            | 1.00-1.13           | 4.67x10 <sup>-2</sup>        |
|                 |                                 |                      |                    |                      | <b>1.07</b>     | <b>1.05-1.10</b>    | <b>7.46x10<sup>-10</sup></b> |
| JAPAN           | 0.88 (850/-/1111)               | 0.87 (470/131/12)    | 0.87 (1041/-/150)  | 0.87 (516/160/6)     | 1.04            | 0.93-1.16           | 5.38x10 <sup>-1</sup>        |
|                 |                                 |                      |                    |                      |                 |                     |                              |
| <b>Combined</b> |                                 |                      |                    |                      | <b>1.07</b>     | <b>1.04-1.10</b>    | <b>7.30x10<sup>-10</sup></b> |
|                 |                                 |                      |                    |                      |                 |                     |                              |

**Supplementary Table 3: Relationship between rs1321311 (6p21), rs3824999 (11q13.4), and rs5934683 (Xp22.2) genotypes and sex, age at diagnosis of CRC, tumor site (rectal [ICD9:154], colonic [ICD9:153]), stage, family history of CRC (presence of 1+ first degree relative) and MSI status. \*OR>1.0 indicative of over-representation of rectal disease.**

|                       | rs1321311        |         |                     | rs3824999        |         |                     | rs5934683        |         |                     |
|-----------------------|------------------|---------|---------------------|------------------|---------|---------------------|------------------|---------|---------------------|
|                       | OR (95% CI)      | p-value | Sample size         | OR (95% CI)      | p-value | Sample size         | OR (95% CI)      | p-value | Sample size         |
| <b>Sex</b>            | 0.99 (0.95-1.03) | 0.61    | 23,280 <sup>a</sup> | 1.04 (1.00-1.08) | 0.03    | 24,313 <sup>a</sup> | -                | -       | -                   |
| <b>Age</b>            | 0.97 (0.92-1.02) | 0.19    | 22,924 <sup>b</sup> | 0.99 (0.95-1.03) | 0.75    | 22,956 <sup>b</sup> | 1.00 (0.99-1.01) | 0.68    | 20,667 <sup>c</sup> |
| <b>Site*</b>          | 1.02 (0.98-1.08) | 0.26    | 19,843 <sup>d</sup> | 0.97 (0.93-1.01) | 0.12    | 19,889 <sup>d</sup> | 1.00 (0.98-1.01) | 0.70    | 17,589 <sup>e</sup> |
| <b>Family History</b> | 0.97 (0.89-1.04) | 0.39    | 11,867 <sup>f</sup> | 0.97 (0.90-1.03) | 0.32    | 11,909 <sup>f</sup> | 1.00 (0.97-1.02) | 0.81    | 11,782 <sup>f</sup> |
| <b>MSI</b>            | 0.96 (0.81-1.14) | 0.67    | 4,453 <sup>g</sup>  | 1.06 (0.92-1.23) | 0.41    | 4,462 <sup>g</sup>  | 0.99 (0.98-1.04) | 0.66    | 3,060 <sup>h</sup>  |
| <b>Stage</b>          | 0.96 (0.88-1.05) | 0.37    | 5,681 <sup>i</sup>  | 1.02 (0.95-1.10) | 0.55    | 5,726 <sup>i</sup>  | 1.00 (0.98-1.04) | 0.66    | 5,679 <sup>i</sup>  |

a: UK1, SCOTLAND 1, SCOTLAND 2, VQ58, CCFR1, UK2, UK3, SCOTLAND 3 , COINNBS, SWEDEN, UK4, HELSINKI

b: UK1, SCOTLAND 1, SCOTLAND 2, VQ58, UK2, UK3, SCOTLAND 3 , COINNBS, SWEDEN, UK4, HELSINKI

c: UK1, SCOTLAND 1, SCOTLAND 2, VQ58, UK2, UK3, SCOTLAND 3 , SWEDEN, UK4, HELSINKI

d: SCOTLAND 2, VQ58, UK2, UK3, SCOTLAND 3 , COINNBS, SWEDEN, HELSINKI

e: SCOTLAND 2, VQ58, UK2, UK3, SCOTLAND 3 , SWEDEN, HELSINKI

f: UK2, UK3, SCOTLAND 3, HELSINKI

g: UK1, UK2, UK3, COINNBS

h: UK1, UK2, UK3

i: UK1, SCOTLAND 2, SCOTLAND 3, SWEDEN, HELSINKI

**Supplementary Table 4: Details of transcription factor binding sites (TFBSs) and regulatory regions as predicted by Transfac Matrix Database (v7), ENCODE CHIP-Seq and ENCODE UW DNaseI Hypersensitivity (HS) data.** "Score" refers to the confidence value assigned to each predicted binding region by the three different programs; regions of DNaseI HS are highlighted. For comparison, the observed and imputed SNPs and associated SNP-Test *P*-values are shown. The genotyped SNP with the most significant association is highlighted in blue; imputed SNPs showing a more significant association are highlighted in red with the SNP showing the most significant association highlighted in purple. Also shown are gene regions with exons highlighted in grey.

### 6p21 (rs1321311)

| Gene region | rsID       | SNP type  | P-value | TF type | Source          | Score | Chrom start | Chrom end |
|-------------|------------|-----------|---------|---------|-----------------|-------|-------------|-----------|
|             | rs10214849 | Genotyped | 0.632   |         |                 |       | 36709423    |           |
|             | rs9296193  | Imputed   | 0.667   |         |                 |       | 36709434    |           |
| DNaseI HS   |            |           |         |         | ENCODE          | 1000  | 36709820    | 36710050  |
|             | rs6937430  | Imputed   | 0.629   |         |                 |       | 36709875    |           |
| DNaseI HS   |            |           |         |         | ENCODE          | 173   | 36710260    | 36710430  |
| DNaseI HS   |            |           |         |         | ENCODE          | 95    | 36710560    | 36710770  |
|             | rs4713989  | Genotyped | 0.645   |         |                 |       | 36712176    |           |
| DNaseI HS   |            |           |         |         | ENCODE          | 153   | 36712200    | 36712510  |
|             |            |           |         | EBF     | ENCODE ChIP-seq | 799   | 36712201    | 36712641  |
|             |            |           |         | CEBPB   | ENCODE ChIP-seq | 388   | 36714395    | 36714711  |
| DNaseI HS   |            |           |         |         | ENCODE          | 143   | 36715220    | 36715510  |
|             |            |           |         | RXRA    | ENCODE ChIP-seq | 178   | 36717292    | 36717668  |
|             |            |           |         | p300    | ENCODE ChIP-seq | 303   | 36717324    | 36717624  |
|             |            |           |         | HNF4A   | ENCODE ChIP-seq | 403   | 36717355    | 36717660  |
|             |            |           |         | BAF155  | ENCODE ChIP-seq | 1000  | 36718400    | 36719560  |
|             |            |           |         | BAF170  | ENCODE ChIP-seq | 861   | 36718451    | 36719233  |
|             |            |           |         | FOSL2   | ENCODE ChIP-seq | 240   | 36718572    | 36719302  |
| DNaseI HS   |            |           |         |         | ENCODE          | 394   | 36718580    | 36718770  |
|             |            |           |         | HEY1    | ENCODE ChIP-seq | 37    | 36718705    | 36719185  |
|             |            |           |         | Ini1    | ENCODE ChIP-seq | 259   | 36718791    | 36719580  |
|             |            |           |         | GR      | ENCODE ChIP-seq | 170   | 36718796    | 36719242  |
|             |            |           |         | JunD    | ENCODE ChIP-seq | 119   | 36718884    | 36719160  |
| DNaseI HS   |            |           |         |         | ENCODE          | 768   | 36718900    | 36719370  |
|             |            |           |         | NRSF    | ENCODE ChIP-seq | 206   | 36718923    | 36719167  |
|             | rs9368944  | Genotyped | 0.567   |         |                 |       | 36719846    |           |
|             |            |           |         | GR      | ENCODE ChIP-seq | 258   | 36720272    | 36720793  |
|             |            |           |         | Ini1    | ENCODE ChIP-seq | 189   | 36720328    | 36720885  |
|             |            |           |         | BAF155  | ENCODE ChIP-seq | 469   | 36720355    | 36720906  |
|             |            |           |         | JunD    | ENCODE ChIP-seq | 312   | 36720381    | 36720626  |
| DNaseI HS   |            |           |         |         | ENCODE          | 1000  | 36720400    | 36720610  |
|             |            |           |         | CEBPB   | ENCODE ChIP-seq | 310   | 36720626    | 36720906  |
| DNaseI HS   |            |           |         |         | ENCODE          | 401   | 36720700    | 36720950  |
|             |            |           |         | PU.1    | ENCODE ChIP-seq | 1000  | 36720908    | 36721324  |
| DNaseI HS   |            |           |         |         | ENCODE          | 110   | 36721060    | 36721250  |
|             |            |           |         | Pbx1a   | TransFac        | 1.89  | 36725309    | 36725318  |
|             |            |           |         | NFKB    | ENCODE ChIP-seq | 126   | 36725374    | 36725592  |
|             |            |           |         | NRSF    | ENCODE ChIP-seq | 174   | 36725389    | 36725761  |
|             |            |           |         | EBF     | ENCODE ChIP-seq | 241   | 36725392    | 36725813  |
| DNaseI HS   |            |           |         |         | ENCODE          | 97    | 36725440    | 36725650  |



|           |                   |                  |                 |          |                 |      |                 |          |
|-----------|-------------------|------------------|-----------------|----------|-----------------|------|-----------------|----------|
|           |                   |                  |                 | BAF155   | ENCODE ChIP-seq | 628  | 36725508        | 36725699 |
|           |                   |                  |                 | MZF-1    | TransFac        | 1.69 | 36725591        | 36725599 |
|           | <b>rs12207916</b> | <b>Imputed</b>   | <b>5.16E-03</b> |          |                 |      | <b>36725630</b> |          |
| DNaseI HS |                   |                  |                 | CEBPB    | ENCODE ChIP-seq | 108  | 36725640        | 36725912 |
|           |                   |                  |                 |          | ENCODE          | 159  | 36725660        | 36725930 |
|           |                   |                  |                 | c-Jun    | ENCODE ChIP-seq | 426  | 36725832        | 36725949 |
|           | rs6457932         | Imputed          | 0.349           |          |                 |      | 36726118        |          |
|           | rs6457933         | Imputed          | 0.108           |          |                 |      | 36726246        |          |
|           |                   |                  |                 | IRF4     | ENCODE ChIP-seq | 497  | 36726514        | 36727028 |
|           |                   |                  |                 | PU.1     | ENCODE ChIP-seq | 1000 | 36726517        | 36727130 |
|           |                   |                  |                 | SP1      | ENCODE ChIP-seq | 208  | 36726586        | 36727062 |
|           |                   |                  |                 | BCL11A   | ENCODE ChIP-seq | 784  | 36726596        | 36727038 |
|           |                   |                  |                 | NFKB     | ENCODE ChIP-seq | 46   | 36726612        | 36727087 |
|           |                   |                  |                 | TCF12    | ENCODE ChIP-seq | 427  | 36726630        | 36726960 |
| DNaseI HS |                   |                  |                 |          | ENCODE          | 753  | 36726660        | 36727130 |
|           |                   |                  |                 | PAX5-N19 | ENCODE ChIP-seq | 241  | 36726670        | 36727012 |
|           | rs1321313         | Genotyped        | 0.013           |          |                 |      | 36726799        |          |
|           | rs9349003         | Imputed          | 0.340           |          |                 |      | 36727368        |          |
|           | <b>rs7742159</b>  | <b>Imputed</b>   | <b>5.39E-03</b> |          |                 |      | <b>36727430</b> |          |
|           |                   |                  |                 | EBF      | ENCODE ChIP-seq | 118  | 36727550        | 36727878 |
| DNaseI HS |                   |                  |                 | CEBPB    | ENCODE ChIP-seq | 166  | 36727704        | 36727910 |
|           |                   |                  |                 |          | ENCODE          | 102  | 36727720        | 36727890 |
|           | rs9366912         | Imputed          | 0.407           |          |                 |      | 36727861        |          |
|           | rs12524435        | Imputed          | 0.339           |          |                 |      | 36728126        |          |
|           |                   |                  |                 | CEBPB    | ENCODE ChIP-seq | 341  | 36728145        | 36728376 |
|           |                   |                  |                 | RXRA     | ENCODE ChIP-seq | 114  | 36728199        | 36728477 |
|           | rs10947616        | Imputed          | 0.338           |          |                 |      | 36728477        |          |
|           | <b>rs9470358</b>  | <b>Imputed</b>   | <b>4.60E-03</b> |          |                 |      | <b>36728480</b> |          |
|           | rs4713993         | Imputed          | 0.338           |          |                 |      | 36728720        |          |
|           | rs7382183         | Imputed          | 0.338           |          |                 |      | 36728853        |          |
|           | rs6915170         | Imputed          | 0.338           |          |                 |      | 36729017        |          |
|           | rs4568449         | Imputed          | 0.108           |          |                 |      | 36729121        |          |
|           | rs4464789         | Genotyped        | 0.329           |          |                 |      | 36729156        |          |
|           | rs10456441        | Imputed          | 0.338           |          |                 |      | 36729337        |          |
|           | rs10456442        | Imputed          | 0.338           |          |                 |      | 36729389        |          |
|           | rs10456443        | Imputed          | 0.338           |          |                 |      | 36729425        |          |
|           | rs4713994         | Imputed          | 0.409           |          |                 |      | 36729511        |          |
|           | rs12210094        | Imputed          | 0.337           |          |                 |      | 36730291        |          |
|           | rs12528913        | Imputed          | 0.326           |          |                 |      | 36730527        |          |
|           | <b>rs9918353</b>  | <b>Imputed</b>   | <b>5.41E-03</b> |          |                 |      | <b>36730655</b> |          |
| DNaseI HS |                   |                  |                 |          | ENCODE          | 417  | 36730800        | 36731230 |
|           | rs1321312         | Imputed          | 0.325           |          |                 |      | 36730852        |          |
|           | <b>rs1321311</b>  | <b>Genotyped</b> | <b>6.25E-03</b> |          |                 |      | <b>36730878</b> |          |
|           | rs12530170        | Genotyped        | 0.824           |          |                 |      | 36731061        |          |
|           |                   |                  |                 | NRSF     | ENCODE ChIP-seq | 95   | 36731099        | 36731443 |
|           | rs1321310         | Imputed          | 7.42E-03        |          |                 |      | 36731102        |          |
|           | rs4331968         | Imputed          | 8.08E-03        |          |                 |      | 36731221        |          |
| DNaseI HS |                   |                  |                 |          | ENCODE          | 357  | 36731260        | 36731450 |
|           | rs9470361         | Imputed          | 7.73E-03        |          |                 |      | 36731357        |          |
|           | rs7774130         | Imputed          | 8.06E-03        |          |                 |      | 36731734        |          |
|           |                   |                  |                 | EBF      | ENCODE ChIP-seq | 110  | 36731903        | 36732220 |
|           | rs7740181         | Imputed          | 0.117           |          |                 |      | 36732089        |          |
|           |                   |                  |                 | c-Jun    | ENCODE ChIP-seq | 514  | 36732176        | 36732506 |
|           |                   |                  |                 | c-Fos    | ENCODE ChIP-seq | 305  | 36732201        | 36732497 |

|           |            |            |           |          |                 |                 |          |          |          |
|-----------|------------|------------|-----------|----------|-----------------|-----------------|----------|----------|----------|
| DNaseI HS |            |            |           |          | ENCODE          | 1000            | 36732300 | 36732490 |          |
|           |            |            |           | USF-1    | ENCODE ChIP-seq | 817             | 36732353 | 36732453 |          |
|           | rs12203953 | Imputed    | 0.350     |          |                 |                 | 36732400 |          |          |
|           | rs9470362  | Imputed    | 0.123     |          |                 |                 | 36732627 |          |          |
|           | rs9470363  | Imputed    | 0.124     |          |                 |                 | 36732691 |          |          |
|           | rs6907437  | Imputed    | 0.128     |          |                 |                 | 36732999 |          |          |
| DNaseI HS |            |            |           |          | ENCODE          | 182             | 36733120 | 36733310 |          |
|           |            | rs6907793  | Imputed   | 0.131    |                 |                 | 36733184 |          |          |
|           |            | rs6930671  | Imputed   | 0.132    |                 |                 | 36733250 |          |          |
|           |            | rs11969445 | Imputed   | 0.130    |                 |                 | 36733360 |          |          |
|           | rs9470366  | Imputed    | 0.031     |          |                 | 36733540        |          |          |          |
| DNaseI HS |            |            |           |          | ENCODE          | 1000            | 36733840 | 36734250 |          |
|           |            |            |           | PAX5-N19 | ENCODE ChIP-seq | 121             | 36733879 | 36734419 |          |
|           |            |            |           | BATF     | ENCODE ChIP-seq | 163             | 36733913 | 36734308 |          |
|           |            |            |           | EBF      | ENCODE ChIP-seq | 493             | 36733933 | 36734256 |          |
|           |            |            |           | NFKB     | ENCODE ChIP-seq | 120             | 36733980 | 36734419 |          |
|           |            |            |           | PAX5-C20 | ENCODE ChIP-seq | 251             | 36734000 | 36734333 |          |
|           |            | rs6936598  | Imputed   | 0.130    |                 |                 | 36734074 |          |          |
|           |            |            |           | Arnt     | TransFac        | 2.76            | 36734095 | 36734115 |          |
|           |            |            |           | c-Myc    | TransFac        | 2.13            | 36734095 | 36734115 |          |
|           |            |            |           | SREBP-1a | TransFac        | 2.67            | 36734099 | 36734110 |          |
|           |            | rs6936993  | Imputed   | 0.132    |                 |                 | 36734300 |          |          |
|           | rs9470367  | Imputed    | 0.326     |          |                 | 36734910        |          |          |          |
|           | rs7756236  | Imputed    | 7.85E-03  |          |                 | 36735031        |          |          |          |
| DNaseI HS |            |            |           |          | ENCODE          | 1000            | 36735140 | 36735390 |          |
|           |            |            |           | BCL3     | ENCODE ChIP-seq | 119             | 36735264 | 36735564 |          |
|           |            |            |           | NFKB     | ENCODE ChIP-seq | 1000            | 36735422 | 36735425 |          |
|           |            | rs6920453  | Imputed   | 0.319    |                 |                 | 36735461 |          |          |
|           |            | rs9462207  | Imputed   | 7.85E-03 |                 |                 | 36735577 |          |          |
|           |            | rs9368950  | Genotyped | 0.347    |                 |                 | 36735850 |          |          |
|           |            | rs9462208  | Imputed   | 0.133    |                 |                 | 36735868 |          |          |
|           |            | rs9462209  | Genotyped | 0.141    |                 |                 | 36736020 |          |          |
|           |            |            |           |          | HEY1            | ENCODE ChIP-seq | 42       | 36736470 | 36736845 |
|           |            |            |           |          | STAT2           | ENCODE ChIP-seq | 161      | 36736508 | 36736967 |
|           |            |            |           |          | c-Myc           | ENCODE ChIP-seq | 354      | 36736511 | 36737120 |
|           |            |            |           |          | c-Jun           | ENCODE ChIP-seq | 107      | 36736539 | 36736941 |
|           |            |            |           |          | STAT1           | ENCODE ChIP-seq | 274      | 36736555 | 36737050 |
|           | DNaseI HS  |            |           |          |                 | ENCODE          | 387      | 36736600 | 36736890 |
|           |            |            |           |          | Max             | ENCODE ChIP-seq | 498      | 36736621 | 36737110 |
|           |            |            |           | BCL3     | ENCODE ChIP-seq | 1000            | 36736634 | 36737717 |          |
|           |            |            |           | PAX5-N19 | ENCODE ChIP-seq | 113             | 36736644 | 36737199 |          |
|           |            | rs6926780  | Imputed   | 0.386    |                 |                 | 36736650 |          |          |
|           |            |            |           |          | PAX5-C20        | ENCODE ChIP-seq | 164      | 36736721 | 36737085 |
|           |            |            |           |          | NFKB            | ENCODE ChIP-seq | 91       | 36736774 | 36737107 |
|           |            |            |           |          | Pbx3            | ENCODE ChIP-seq | 200      | 36736781 | 36737169 |
|           |            | rs9462210  | Imputed   | 7.82E-03 |                 |                 | 36736931 |          |          |
|           |            |            |           |          | Pbx3            | ENCODE ChIP-seq | 98       | 36737344 | 36737584 |
|           |            | rs10807170 | Genotyped | 0.031    |                 |                 | 36737422 |          |          |
|           | rs4713996  | Imputed    | 0.067     |          |                 | 36737692        |          |          |          |
|           | rs4713997  | Imputed    | 0.384     |          |                 | 36737811        |          |          |          |
| DNaseI HS |            |            |           |          | ENCODE          | 340             | 36738100 | 36738530 |          |
|           |            |            |           | NFKB     | ENCODE ChIP-seq | 119             | 36738149 | 36739005 |          |
|           |            |            |           | BATF     | ENCODE ChIP-seq | 63              | 36738245 | 36738550 |          |
|           |            |            |           | BAF155   | ENCODE ChIP-seq | 427             | 36738311 | 36739440 |          |

|           |            |           |       |          |                 |      |          |          |
|-----------|------------|-----------|-------|----------|-----------------|------|----------|----------|
|           |            |           |       | Ini1     | ENCODE ChIP-seq | 227  | 36738314 | 36739025 |
|           | rs9380585  | Imputed   | 0.383 |          |                 |      | 36738346 |          |
|           | rs9394368  | Imputed   | 0.066 |          |                 |      | 36738503 |          |
|           |            |           |       | BAF170   | ENCODE ChIP-seq | 868  | 36738562 | 36738905 |
| DNaseI HS |            |           |       |          | ENCODE          | 244  | 36738580 | 36738750 |
|           |            |           |       | CEBPB    | ENCODE ChIP-seq | 899  | 36738716 | 36739111 |
|           |            |           |       | HNF4A    | ENCODE ChIP-seq | 211  | 36738720 | 36739058 |
| DNaseI HS |            |           |       |          | ENCODE          | 336  | 36738780 | 36739050 |
|           |            |           |       | AREB6    | TransFac        | 2.6  | 36738824 | 36738837 |
|           |            |           |       | TBP      | TransFac        | 1.65 | 36739239 | 36739254 |
|           |            |           |       | NF-E2    | ENCODE ChIP-seq | 281  | 36739301 | 36739527 |
| DNaseI HS |            |           |       |          | ENCODE          | 83   | 36739320 | 36739510 |
|           | rs9380586  | Imputed   | 0.372 |          |                 |      | 36739542 |          |
|           |            |           |       | PU.1     | ENCODE ChIP-seq | 126  | 36739583 | 36739874 |
|           |            |           |       | IRF4     | ENCODE ChIP-seq | 134  | 36739602 | 36740231 |
| DNaseI HS |            |           |       |          | ENCODE          | 233  | 36739640 | 36739930 |
|           |            |           |       | NFKB     | ENCODE ChIP-seq | 110  | 36739800 | 36740167 |
|           |            |           |       | JunD     | ENCODE ChIP-seq | 352  | 36739844 | 36740258 |
|           |            |           |       | BATF     | ENCODE ChIP-seq | 325  | 36739856 | 36740214 |
| DNaseI HS |            |           |       |          | ENCODE          | 138  | 36739940 | 36740110 |
|           |            |           |       | POU2F2   | ENCODE ChIP-seq | 796  | 36740309 | 36740962 |
|           |            |           |       | HEY1     | ENCODE ChIP-seq | 160  | 36740336 | 36740644 |
|           |            |           |       | EBF      | ENCODE ChIP-seq | 285  | 36740385 | 36740865 |
| DNaseI HS | rs4711456  | Imputed   | 0.080 |          |                 |      | 36740460 |          |
|           |            |           |       |          | ENCODE          | 297  | 36740460 | 36740830 |
|           |            |           |       | NFKB     | ENCODE ChIP-seq | 164  | 36740478 | 36740942 |
|           |            |           |       | TCF12    | ENCODE ChIP-seq | 113  | 36740535 | 36740811 |
|           | rs13196885 | Imputed   | 0.365 |          |                 |      | 36740666 |          |
|           | rs4713999  | Genotyped | 0.072 |          |                 |      | 36741047 |          |
|           | rs4711457  | Imputed   | 0.065 |          |                 |      | 36741138 |          |
| DNaseI HS |            |           |       |          | ENCODE          | 132  | 36741240 | 36741390 |
|           | rs1969701  | Imputed   | 0.379 |          |                 |      | 36741676 |          |
| DNaseI HS |            |           |       |          | ENCODE          | 99   | 36742080 | 36742270 |
|           | rs6930083  | Imputed   | 0.063 |          |                 |      | 36742134 |          |
|           | rs6931097  | Imputed   | 0.166 |          |                 |      | 36742437 |          |
|           |            |           |       | NFKB     | ENCODE ChIP-seq | 193  | 36742534 | 36743469 |
|           |            |           |       | HNF4A    | ENCODE ChIP-seq | 172  | 36742679 | 36743175 |
|           |            |           |       | BAF155   | ENCODE ChIP-seq | 666  | 36742715 | 36743228 |
|           |            |           |       | FOSL2    | ENCODE ChIP-seq | 125  | 36742720 | 36743263 |
|           |            |           |       | TAF1     | ENCODE ChIP-seq | 447  | 36742738 | 36743359 |
|           |            |           |       | POU2F2   | ENCODE ChIP-seq | 728  | 36742754 | 36743292 |
|           |            |           |       | SP1      | ENCODE ChIP-seq | 682  | 36742760 | 36743311 |
|           |            |           |       | BCL11A   | ENCODE ChIP-seq | 699  | 36742763 | 36743257 |
|           |            |           |       | EBF      | ENCODE ChIP-seq | 1000 | 36742768 | 36743364 |
|           |            |           |       | PAX5-N19 | ENCODE ChIP-seq | 1000 | 36742780 | 36743370 |
|           |            |           |       | HSF1     | ENCODE ChIP-seq | 241  | 36742785 | 36743114 |
|           |            |           |       | CEBPB    | ENCODE ChIP-seq | 1000 | 36742789 | 36743242 |
|           |            |           |       | p300     | ENCODE ChIP-seq | 704  | 36742808 | 36743203 |
|           |            |           |       | IRF4     | ENCODE ChIP-seq | 555  | 36742808 | 36743390 |
|           |            |           |       | JunD     | ENCODE ChIP-seq | 492  | 36742809 | 36743180 |
|           |            |           |       | BATF     | ENCODE ChIP-seq | 732  | 36742809 | 36743196 |
|           |            |           |       | TCF12    | ENCODE ChIP-seq | 509  | 36742813 | 36743187 |
|           |            |           |       | c-Myc    | ENCODE ChIP-seq | 351  | 36742816 | 36743217 |
|           |            |           |       | PAX5-C20 | ENCODE ChIP-seq | 1000 | 36742816 | 36743384 |

|           |            |           |          |        |                 |      |          |          |
|-----------|------------|-----------|----------|--------|-----------------|------|----------|----------|
|           |            |           |          | c-Jun  | ENCODE ChIP-seq | 173  | 36742841 | 36743140 |
|           |            |           |          | Ini1   | ENCODE ChIP-seq | 232  | 36742843 | 36743217 |
|           |            |           |          | HEY1   | ENCODE ChIP-seq | 161  | 36742853 | 36743331 |
|           |            |           |          | BAF170 | ENCODE ChIP-seq | 647  | 36742862 | 36743206 |
|           |            |           |          | BCL3   | ENCODE ChIP-seq | 119  | 36742877 | 36743190 |
| DNaseI HS |            |           |          |        | ENCODE          | 1000 | 36742880 | 36743150 |
|           |            |           |          | PU.1   | ENCODE ChIP-seq | 822  | 36742890 | 36743338 |
|           |            |           |          | NRSF   | ENCODE ChIP-seq | 168  | 36742933 | 36743246 |
|           |            |           |          | Egr-2  | TransFac        | 2.35 | 36742947 | 36742959 |
|           |            |           |          | p53    | TransFac        | 4.55 | 36743012 | 36743032 |
|           |            |           |          | POU3F2 | TransFac        | 2.06 | 36743479 | 36743489 |
|           |            |           |          | Rad21  | ENCODE ChIP-seq | 139  | 36743573 | 36743630 |
|           | rs66761782 | Imputed   | 6.94E-03 |        |                 |      | 36744058 |          |
|           |            |           |          | AP-1   | TransFac        | 2.21 | 36744277 | 36744290 |
|           |            |           |          | Max    | ENCODE ChIP-seq | 639  | 36744338 | 36744565 |
|           |            |           |          | EBF    | ENCODE ChIP-seq | 53   | 36744369 | 36744656 |
| DNaseI HS |            |           |          |        | ENCODE          | 112  | 36744380 | 36744570 |
|           | rs6457934  | Imputed   | 0.178    |        |                 |      | 36745303 |          |
| DNaseI HS |            |           |          |        | ENCODE          | 140  | 36745480 | 36745650 |
|           | rs4714000  | Genotyped | 0.636    |        |                 |      | 36745575 |          |
| DNaseI HS |            |           |          |        | ENCODE          | 384  | 36746040 | 36746310 |
|           | rs4714001  | Imputed   | 0.035    |        |                 |      | 36746153 |          |
|           | rs1321309  | Imputed   | 0.209    |        |                 |      | 36746614 |          |
|           | rs1321308  | Imputed   | 0.222    |        |                 |      | 36746669 |          |
|           |            |           |          | HNF4A  | ENCODE ChIP-seq | 209  | 36747420 | 36747819 |
|           |            |           |          | USF-1  | ENCODE ChIP-seq | 55   | 36747495 | 36747701 |
|           | rs58714705 | Imputed   | 0.213    |        |                 |      | 36747591 |          |
| DNaseI HS |            |           |          |        | ENCODE          | 148  | 36747820 | 36748070 |
|           | rs11758192 | Imputed   | 0.213    |        |                 |      | 36747946 |          |
|           |            |           |          | STAT1  | ENCODE ChIP-seq | 50   | 36748055 | 36748275 |
|           | rs10947618 | Imputed   | 0.213    |        |                 |      | 36748110 |          |
|           | rs10947619 | Imputed   | 0.210    |        |                 |      | 36748135 |          |
|           | rs10947620 | Imputed   | 0.213    |        |                 |      | 36748166 |          |
|           | rs7452626  | Imputed   | 0.602    |        |                 |      | 36748219 |          |
|           | rs10947621 | Imputed   | 0.209    |        |                 |      | 36748250 |          |
|           | rs9349005  | Imputed   | 0.226    |        |                 |      | 36748346 |          |
|           | rs9380587  | Imputed   | 0.623    |        |                 |      | 36748461 |          |
|           | rs12174270 | Imputed   | 0.213    |        |                 |      | 36748647 |          |
|           | rs7747146  | Imputed   | 0.181    |        |                 |      | 36748968 |          |
|           | rs7764973  | Imputed   | 0.213    |        |                 |      | 36749014 |          |
|           | rs6457935  | Imputed   | 0.213    |        |                 |      | 36749116 |          |
|           | rs12199346 | Imputed   | 6.11E-03 |        |                 |      | 36749524 |          |
|           |            |           |          | LCR-F1 | TransFac        | 1.71 | 36749563 | 36749576 |
|           |            |           |          | XBP-1  | TransFac        | 2.35 | 36749614 | 36749631 |
| DNaseI HS |            |           |          |        | ENCODE          | 69   | 36749680 | 36749910 |
|           |            |           |          | SRF    | TransFac        | 1.99 | 36749730 | 36749745 |
|           | rs1977172  | Imputed   | 0.622    |        |                 |      | 36749732 |          |
|           | rs1010424  | Imputed   | 0.213    |        |                 |      | 36749763 |          |
|           | rs1010423  | Imputed   | 0.213    |        |                 |      | 36749769 |          |
|           |            |           |          | CUTL1  | TransFac        | 1.94 | 36749900 | 36749910 |
|           | rs4711458  | Imputed   | 0.213    |        |                 |      | 36749919 |          |
|           | rs4711459  | Imputed   | 0.213    |        |                 |      | 36750002 |          |
|           | rs4711460  | Imputed   | 0.213    |        |                 |      | 36750106 |          |
|           | rs4711461  | Imputed   | 0.230    |        |                 |      | 36750146 |          |

|                 |             |           |       |        |                 |      |          |          |          |
|-----------------|-------------|-----------|-------|--------|-----------------|------|----------|----------|----------|
|                 | rs4714002   | Imputed   | 0.213 |        |                 |      |          | 36750164 |          |
|                 | rs4711462   | Imputed   | 0.213 |        |                 |      |          | 36750168 |          |
|                 | rs4714003   | Imputed   | 0.213 |        |                 |      |          | 36750238 |          |
|                 |             |           |       | POU2F1 | TransFac        | 2.41 | 36750348 |          | 36750367 |
|                 |             |           |       | SRF    | TransFac        | 1.88 | 36750354 |          | 36750368 |
|                 | rs10947622  | Imputed   | 0.213 |        |                 |      | 36750380 |          |          |
|                 |             |           |       | p53    | TransFac        | 2.34 | 36750494 |          | 36750514 |
|                 | rs12214686  | Imputed   | 0.206 |        |                 |      | 36750529 |          |          |
|                 |             |           |       | Arnt   | TransFac        | 1.96 | 36750663 |          | 36750683 |
|                 |             |           |       | c-Myc  | TransFac        | 1.77 | 36750663 |          | 36750683 |
| DNaseI HS       |             |           |       |        | ENCODE          | 588  | 36750800 |          | 36750990 |
|                 |             |           |       | c-Jun  | ENCODE ChIP-seq | 428  | 36750808 |          | 36750975 |
|                 | rs10947623  | Imputed   | 0.206 |        |                 |      | 36750814 |          |          |
|                 |             |           |       | POU3F2 | TransFac        | 1.7  | 36750883 |          | 36750899 |
|                 |             |           |       | Lmo2   | TransFac        | 2.23 | 36750942 |          | 36750951 |
|                 | rs12192827  | Imputed   | 0.213 |        |                 |      | 36750949 |          |          |
|                 | rs12192877  | Imputed   | 0.213 |        |                 |      | 36750977 |          |          |
|                 | rs72853370  | Imputed   | 0.213 |        |                 |      | 36751200 |          |          |
|                 | rs11962192  | Imputed   | 0.213 |        |                 |      | 36751215 |          |          |
|                 | rs113041051 | Imputed   | 0.213 |        |                 |      | 36751224 |          |          |
|                 | rs9357222   | Imputed   | 0.213 |        |                 |      | 36751338 |          |          |
|                 | rs9368953   | Imputed   | 0.213 |        |                 |      | 36751444 |          |          |
|                 |             |           |       | STAT1  | ENCODE ChIP-seq | 155  | 36751645 |          | 36752569 |
|                 |             |           |       | NFKB   | ENCODE ChIP-seq | 148  | 36751723 |          | 36752524 |
|                 | rs9394371   | Imputed   | 0.213 |        |                 |      | 36751733 |          |          |
|                 |             |           |       | PU.1   | ENCODE ChIP-seq | 823  | 36751757 |          | 36752165 |
|                 |             |           |       | HEY1   | ENCODE ChIP-seq | 616  | 36751779 |          | 36752604 |
|                 |             |           |       | TAF1   | ENCODE ChIP-seq | 304  | 36751788 |          | 36752505 |
|                 |             |           |       | POU2F2 | ENCODE ChIP-seq | 181  | 36751815 |          | 36752543 |
| DNaseI HS       |             |           |       |        | ENCODE          | 308  | 36751840 |          | 36751990 |
|                 |             |           |       | SRF    | TransFac        | 2.46 | 36751897 |          | 36751911 |
|                 |             |           |       | p300   | ENCODE ChIP-seq | 106  | 36751941 |          | 36752370 |
|                 |             |           |       | CEBPB  | ENCODE ChIP-seq | 83   | 36752026 |          | 36752491 |
| DNaseI HS       |             |           |       |        | ENCODE          | 537  | 36752060 |          | 36752510 |
|                 |             |           |       | p53    | TransFac        | 3.3  | 36752203 |          | 36752223 |
| CDKN1A Exon 1   |             |           |       |        |                 |      | 36752245 |          | 36752279 |
| CDKN1A Intron 1 |             |           |       |        |                 |      | 36752280 |          | 36753656 |
|                 | rs3829963   | Genotyped | 0.252 |        |                 |      | 36752364 |          |          |
| DNaseI HS       |             |           |       |        | ENCODE          | 110  | 36752520 |          | 36752790 |
|                 |             |           |       | FOXC1  | TransFac        | 2.98 | 36752741 |          | 36752757 |
|                 |             |           |       | FOXD1  | TransFac        | 3.72 | 36752741 |          | 36752757 |
|                 |             |           |       | FOXF2  | TransFac        | 2.77 | 36752741 |          | 36752757 |
|                 |             |           |       | FOXI1  | TransFac        | 1.73 | 36752743 |          | 36752756 |
| DNaseI HS       |             |           |       |        | ENCODE          | 432  | 36752860 |          | 36753210 |
|                 |             |           |       | NFKB   | ENCODE ChIP-seq | 233  | 36752897 |          | 36755402 |
|                 |             |           |       | p53    | TransFac        | 3.36 | 36753085 |          | 36753105 |
|                 |             |           |       | SRF    | TransFac        | 1.73 | 36753093 |          | 36753111 |
|                 |             |           |       | p53    | TransFac        | 2.58 | 36753095 |          | 36753105 |
|                 |             |           |       | STAT3  | TransFac        | 1.85 | 36753095 |          | 36753116 |
|                 |             |           |       | HEY1   | ENCODE ChIP-seq | 1000 | 36753132 |          | 36755082 |
|                 |             |           |       | SRF    | ENCODE ChIP-seq | 1000 | 36753401 |          | 36753987 |
|                 |             |           |       | p300   | ENCODE ChIP-seq | 247  | 36753453 |          | 36753966 |
| DNaseI HS       |             |           |       |        | ENCODE          | 376  | 36753460 |          | 36753830 |
|                 |             |           |       | CEBPB  | ENCODE ChIP-seq | 86   | 36753482 |          | 36753903 |

|                 |           |                 |      |          |          |
|-----------------|-----------|-----------------|------|----------|----------|
|                 | JunD      | ENCODE ChIP-seq | 113  | 36753483 | 36753923 |
|                 | HNF4A     | ENCODE ChIP-seq | 195  | 36753496 | 36754726 |
|                 | Sin3Ak-20 | ENCODE ChIP-seq | 302  | 36753532 | 36753841 |
|                 | SREBP1    | ENCODE ChIP-seq | 12   | 36753532 | 36754042 |
|                 | USF-1     | ENCODE ChIP-seq | 164  | 36753628 | 36753872 |
| CDKN1A Exon 2   |           |                 |      | 36753657 | 36753688 |
| CDKN1A Intron 2 |           |                 |      | 36753689 | 36759851 |
|                 | BAF170    | ENCODE ChIP-seq | 310  | 36753819 | 36755474 |
|                 | STAT1     | ENCODE ChIP-seq | 414  | 36753877 | 36755452 |
|                 | PAX5-N19  | ENCODE ChIP-seq | 216  | 36754015 | 36755157 |
|                 | EBF       | ENCODE ChIP-seq | 453  | 36754026 | 36754594 |
|                 | Ini1      | ENCODE ChIP-seq | 282  | 36754031 | 36756991 |
|                 | GR        | ENCODE ChIP-seq | 1000 | 36754051 | 36756479 |
|                 | Nrf1      | ENCODE ChIP-seq | 237  | 36754070 | 36754496 |
|                 | Max       | ENCODE ChIP-seq | 415  | 36754074 | 36756527 |
|                 | BAF155    | ENCODE ChIP-seq | 414  | 36754074 | 36756900 |
|                 | SREBP1    | ENCODE ChIP-seq | 331  | 36754076 | 36755259 |
|                 | FOSL2     | ENCODE ChIP-seq | 300  | 36754077 | 36754697 |
|                 | JunD      | ENCODE ChIP-seq | 713  | 36754088 | 36754658 |
|                 | SP1       | ENCODE ChIP-seq | 162  | 36754089 | 36754806 |
|                 | c-Myc     | ENCODE ChIP-seq | 434  | 36754093 | 36755452 |
|                 | SREBP2    | ENCODE ChIP-seq | 45   | 36754109 | 36754121 |
|                 | PU.1      | ENCODE ChIP-seq | 303  | 36754112 | 36754350 |
|                 | GABP      | ENCODE ChIP-seq | 45   | 36754114 | 36754341 |
|                 | p300      | ENCODE ChIP-seq | 372  | 36754115 | 36754767 |
|                 | PAX5-C20  | ENCODE ChIP-seq | 553  | 36754116 | 36754746 |
|                 | TAF1      | ENCODE ChIP-seq | 864  | 36754125 | 36755421 |
|                 | TCF12     | ENCODE ChIP-seq | 1000 | 36754131 | 36754984 |
|                 | POU2F2    | ENCODE ChIP-seq | 1000 | 36754138 | 36756424 |
|                 | Sin3Ak-20 | ENCODE ChIP-seq | 1000 | 36754146 | 36754621 |
|                 | NRSF      | ENCODE ChIP-seq | 183  | 36754146 | 36754743 |
| DNaseI HS       |           | ENCODE          | 1000 | 36754160 | 36754590 |
|                 | CEBPB     | ENCODE ChIP-seq | 88   | 36754168 | 36754884 |
|                 | ERRA      | ENCODE ChIP-seq | 372  | 36754185 | 36754832 |
|                 | FOXP2     | ENCODE ChIP-seq | 380  | 36754241 | 36754341 |
|                 | Pbx3      | ENCODE ChIP-seq | 487  | 36754282 | 36754684 |
|                 | c-Jun     | ENCODE ChIP-seq | 185  | 36754286 | 36755391 |
|                 | BCL3      | ENCODE ChIP-seq | 124  | 36754308 | 36754654 |
|                 | SREBP2    | ENCODE ChIP-seq | 38   | 36754348 | 36754534 |
|                 | BCL11A    | ENCODE ChIP-seq | 101  | 36754368 | 36754774 |
|                 | PU.1      | ENCODE ChIP-seq | 97   | 36754369 | 36754576 |
|                 | E47       | TransFac        | 1.93 | 36754671 | 36754687 |
|                 | AREB6     | TransFac        | 1.88 | 36754673 | 36754685 |
|                 | MyoD      | TransFac        | 1.72 | 36754689 | 36754699 |
|                 | Sin3Ak-20 | ENCODE ChIP-seq | 134  | 36754751 | 36755010 |
| DNaseI HS       |           | ENCODE          | 430  | 36754780 | 36755610 |
|                 | FOSL2     | ENCODE ChIP-seq | 335  | 36754819 | 36755646 |
|                 | Input     | ENCODE ChIP-seq | 362  | 36754858 | 36755348 |
|                 | BCL11A    | ENCODE ChIP-seq | 210  | 36754992 | 36755313 |
|                 | JunD      | ENCODE ChIP-seq | 249  | 36755001 | 36755385 |
|                 | Sin3Ak-20 | ENCODE ChIP-seq | 237  | 36755016 | 36755312 |
|                 | EBF       | ENCODE ChIP-seq | 135  | 36755035 | 36755321 |
|                 | ATF       | TransFac        | 2.01 | 36755114 | 36755128 |
|                 | Bach1     | TransFac        | 2.57 | 36755186 | 36755201 |

|           |          |                 |      |          |          |
|-----------|----------|-----------------|------|----------|----------|
|           | AP-1     | TransFac        | 2.47 | 36755187 | 36755200 |
|           | E2F      | TransFac        | 2.41 | 36755330 | 36755342 |
|           | HEY1     | ENCODE ChIP-seq | 326  | 36755648 | 36756385 |
|           | EBF      | ENCODE ChIP-seq | 215  | 36755651 | 36756499 |
|           | TAF1     | ENCODE ChIP-seq | 325  | 36755663 | 36756186 |
| DNaseI HS |          | ENCODE          | 260  | 36755680 | 36755870 |
|           | STAT1    | ENCODE ChIP-seq | 162  | 36755702 | 36756840 |
|           | NFKB     | ENCODE ChIP-seq | 175  | 36755709 | 36757018 |
|           | FOSL2    | ENCODE ChIP-seq | 602  | 36755738 | 36756475 |
|           | BAF170   | ENCODE ChIP-seq | 411  | 36755741 | 36755958 |
|           | c-Myc    | ENCODE ChIP-seq | 641  | 36755769 | 36756511 |
|           | STAT2    | ENCODE ChIP-seq | 96   | 36755798 | 36756529 |
|           | c-Jun    | ENCODE ChIP-seq | 334  | 36755806 | 36756545 |
|           | c-Fos    | ENCODE ChIP-seq | 424  | 36755821 | 36756491 |
|           | JunD     | ENCODE ChIP-seq | 269  | 36755826 | 36756530 |
|           | PAX5-C20 | ENCODE ChIP-seq | 926  | 36755836 | 36756546 |
|           | Brg1     | ENCODE ChIP-seq | 555  | 36755838 | 36756729 |
|           | GABP     | ENCODE ChIP-seq | 39   | 36755840 | 36756203 |
| DNaseI HS |          | ENCODE          | 1000 | 36755880 | 36756370 |
|           | IRF4     | ENCODE ChIP-seq | 611  | 36755912 | 36756604 |
|           | RSRFC4   | TransFac        | 1.96 | 36755955 | 36755971 |
|           | CEBPB    | ENCODE ChIP-seq | 353  | 36755963 | 36756421 |
|           | Bach1    | TransFac        | 2.6  | 36755976 | 36755991 |
|           | BCL3     | ENCODE ChIP-seq | 501  | 36755976 | 36756551 |
|           | AP-1     | TransFac        | 2.54 | 36755977 | 36755990 |
|           | Arnt     | TransFac        | 1.87 | 36755981 | 36756001 |
|           | BATF     | ENCODE ChIP-seq | 636  | 36755984 | 36756497 |
|           | NRSF     | ENCODE ChIP-seq | 45   | 36755999 | 36756484 |
|           | PAX5-N19 | ENCODE ChIP-seq | 456  | 36756018 | 36756516 |
|           | TCF12    | ENCODE ChIP-seq | 661  | 36756022 | 36756393 |
|           | SP1      | ENCODE ChIP-seq | 165  | 36756065 | 36756506 |
|           | BCL11A   | ENCODE ChIP-seq | 442  | 36756086 | 36756505 |
|           | p300     | ENCODE ChIP-seq | 168  | 36756094 | 36756573 |
|           | LUN-1    | TransFac        | 2.34 | 36756132 | 36756149 |
|           | Rad21    | ENCODE ChIP-seq | 200  | 36756184 | 36756781 |
|           | CTCF     | ENCODE ChIP-seq | 680  | 36756191 | 36756542 |
|           | CREB     | TransFac        | 2.19 | 36756229 | 36756244 |
|           | HNF4A    | ENCODE ChIP-seq | 406  | 36756233 | 36756422 |
|           | E2F      | TransFac        | 2.21 | 36756256 | 36756264 |
|           | FOXP2    | ENCODE ChIP-seq | 543  | 36756271 | 36756371 |
|           | Bach1    | TransFac        | 2.14 | 36756283 | 36756298 |
|           | AP-1     | TransFac        | 1.86 | 36756284 | 36756297 |
|           | BAF170   | ENCODE ChIP-seq | 774  | 36756285 | 36756485 |
|           | Egr-1    | ENCODE ChIP-seq | 638  | 36756290 | 36756390 |
|           | Egr-2    | TransFac        | 1.95 | 36756322 | 36756334 |
|           | Egr-3    | TransFac        | 2.01 | 36756322 | 36756334 |
| DNaseI HS |          | ENCODE          | 251  | 36756560 | 36757010 |
|           | EBF      | ENCODE ChIP-seq | 173  | 36756693 | 36757001 |
|           | POU2F2   | ENCODE ChIP-seq | 99   | 36756756 | 36756932 |
| DNaseI HS |          | ENCODE          | 139  | 36757180 | 36757330 |
|           | PAX5-C20 | ENCODE ChIP-seq | 114  | 36757186 | 36757378 |
|           | NFKB     | ENCODE ChIP-seq | 102  | 36757305 | 36757343 |
|           | NFKB     | ENCODE ChIP-seq | 287  | 36757720 | 36759504 |
| DNaseI HS |          | ENCODE          | 97   | 36757780 | 36757930 |

|                 |          |                 |      |          |          |
|-----------------|----------|-----------------|------|----------|----------|
|                 | FOSL2    | ENCODE ChIP-seq | 877  | 36757904 | 36758525 |
|                 | RXRA     | ENCODE ChIP-seq | 761  | 36757938 | 36758419 |
|                 | JunD     | ENCODE ChIP-seq | 396  | 36757957 | 36759002 |
|                 | c-Jun    | ENCODE ChIP-seq | 495  | 36757984 | 36758961 |
|                 | BAF155   | ENCODE ChIP-seq | 789  | 36757991 | 36758995 |
|                 | c-Fos    | ENCODE ChIP-seq | 277  | 36757997 | 36759031 |
|                 | Max      | ENCODE ChIP-seq | 363  | 36758006 | 36758905 |
|                 | STAT1    | ENCODE ChIP-seq | 36   | 36758019 | 36758873 |
|                 | p300     | ENCODE ChIP-seq | 171  | 36758048 | 36758305 |
|                 | EBF      | ENCODE ChIP-seq | 1000 | 36758052 | 36758953 |
|                 | HNF4A    | ENCODE ChIP-seq | 274  | 36758055 | 36758427 |
|                 | BAF170   | ENCODE ChIP-seq | 593  | 36758074 | 36758806 |
|                 | c-Myc    | ENCODE ChIP-seq | 437  | 36758080 | 36758940 |
|                 | Ini1     | ENCODE ChIP-seq | 234  | 36758116 | 36758944 |
| DNaseI HS       |          | ENCODE          | 1000 | 36758140 | 36758490 |
|                 | POU2F2   | ENCODE ChIP-seq | 959  | 36758141 | 36759262 |
|                 | AP-4     | TransFac        | 2.12 | 36758267 | 36758277 |
|                 | TCF12    | ENCODE ChIP-seq | 1000 | 36758339 | 36758987 |
|                 | PAX5-N19 | ENCODE ChIP-seq | 100  | 36758431 | 36759049 |
|                 | BCL11A   | ENCODE ChIP-seq | 224  | 36758514 | 36759042 |
| DNaseI HS       |          | ENCODE          | 828  | 36758560 | 36758890 |
|                 | PU.1     | ENCODE ChIP-seq | 396  | 36758595 | 36759031 |
|                 | MIF-1    | TransFac        | 2    | 36758600 | 36758618 |
|                 | BATF     | ENCODE ChIP-seq | 146  | 36758649 | 36759000 |
|                 | SREBP-1a | TransFac        | 1.94 | 36758655 | 36758666 |
|                 | Arnt     | TransFac        | 1.74 | 36758780 | 36758800 |
|                 | E47      | TransFac        | 1.79 | 36758782 | 36758798 |
|                 | MyoD     | TransFac        | 2.14 | 36758785 | 36758795 |
|                 | Meis-1   | TransFac        | 2.24 | 36758787 | 36758799 |
|                 | TGIF     | TransFac        | 2.12 | 36758788 | 36758799 |
| DNaseI HS       |          | ENCODE          | 215  | 36759000 | 36759270 |
|                 | HNF4A    | ENCODE ChIP-seq | 659  | 36759144 | 36759793 |
|                 | CEBPB    | ENCODE ChIP-seq | 468  | 36759299 | 36759882 |
|                 | RXRA     | ENCODE ChIP-seq | 1000 | 36759311 | 36759804 |
|                 | JunD     | ENCODE ChIP-seq | 169  | 36759355 | 36759751 |
|                 | ERRA     | ENCODE ChIP-seq | 493  | 36759356 | 36760283 |
|                 | POU2F2   | ENCODE ChIP-seq | 535  | 36759357 | 36760199 |
|                 | p300     | ENCODE ChIP-seq | 348  | 36759367 | 36759716 |
|                 | ZBTB33   | ENCODE ChIP-seq | 400  | 36759378 | 36759715 |
| DNaseI HS       |          | ENCODE          | 237  | 36759540 | 36760190 |
|                 | NFKB     | ENCODE ChIP-seq | 42   | 36759589 | 36759715 |
|                 | Ini1     | ENCODE ChIP-seq | 181  | 36759686 | 36760016 |
| CDKN1A Exon 3   |          |                 |      | 36759852 | 36760301 |
|                 | c-Myc    | TransFac        | 2.58 | 36760176 | 36760196 |
|                 | c-Myc    | TransFac        | 3.17 | 36760179 | 36760193 |
|                 | POU2F2   | ENCODE ChIP-seq | 225  | 36760249 | 36760695 |
|                 | E2F      | TransFac        | 2.37 | 36760267 | 36760282 |
| CDKN1A Intron 3 |          |                 |      | 36760302 | 36761505 |
| DNaseI HS       |          | ENCODE          | 201  | 36760440 | 36760590 |
| DNaseI HS       |          | ENCODE          | 143  | 36761140 | 36761330 |
| DNaseI HS       |          | ENCODE          | 291  | 36761440 | 36761610 |
|                 | POU2F2   | ENCODE ChIP-seq | 1000 | 36761442 | 36763056 |
| CDKN1A Exon 4   |          |                 |      | 36761506 | 36763095 |
|                 | Cart-1   | TransFac        | 1.98 | 36761641 | 36761659 |



|           |            |           |       |            |                 |      |          |          |
|-----------|------------|-----------|-------|------------|-----------------|------|----------|----------|
|           |            |           |       | Cdc5       | TransFac        | 1.99 | 36761658 | 36761670 |
| DNaseI HS |            |           |       |            | ENCODE          | 390  | 36761820 | 36762090 |
|           |            |           |       | LCR-F1     | TransFac        | 2.17 | 36762093 | 36762106 |
| DNaseI HS |            |           |       |            | ENCODE          | 143  | 36762180 | 36762590 |
|           |            |           |       | NF-kappaB1 | TransFac        | 1.66 | 36762253 | 36762263 |
| DNaseI HS |            |           |       |            | ENCODE          | 125  | 36762680 | 36762830 |
|           |            |           |       | NFKB       | ENCODE ChIP-seq | 32   | 36762791 | 36763034 |
| DNaseI HS |            |           |       |            | ENCODE          | 226  | 36762840 | 36763070 |
|           |            |           |       | FOXF2      | TransFac        | 2.02 | 36762918 | 36762934 |
|           |            |           |       | POU2F2     | ENCODE ChIP-seq | 603  | 36763148 | 36763609 |
|           |            |           |       | Input      | ENCODE ChIP-seq | 172  | 36763218 | 36763437 |
| DNaseI HS |            |           |       |            | ENCODE          | 187  | 36763300 | 36763570 |
|           | rs876581   | Genotyped | 0.594 |            |                 |      | 36763423 |          |
|           |            |           |       | POU2F2     | ENCODE ChIP-seq | 704  | 36763633 | 36764117 |
|           |            |           |       | PAX5-N19   | ENCODE ChIP-seq | 94   | 36763718 | 36764126 |
| DNaseI HS |            |           |       |            | ENCODE          | 369  | 36763740 | 36764730 |
|           |            |           |       | POU2F2     | ENCODE ChIP-seq | 525  | 36764132 | 36764788 |
|           |            |           |       | NFKB       | ENCODE ChIP-seq | 101  | 36764148 | 36764798 |
|           | rs12207548 | Genotyped | 0.740 |            |                 |      | 36764234 |          |
| DNaseI HS |            |           |       |            | ENCODE          | 51   | 36765000 | 36765150 |
|           |            |           |       | NFKB       | ENCODE ChIP-seq | 92   | 36765558 | 36765674 |
| DNaseI HS |            |           |       |            | ENCODE          | 115  | 36766880 | 36767090 |
|           |            |           |       | NFKB       | ENCODE ChIP-seq | 87   | 36767820 | 36768456 |
|           |            |           |       | PAX5-N19   | ENCODE ChIP-seq | 139  | 36767846 | 36768332 |
|           |            |           |       | PU.1       | ENCODE ChIP-seq | 1000 | 36767880 | 36768436 |
|           |            |           |       | PAX5-C20   | ENCODE ChIP-seq | 92   | 36768009 | 36768254 |
| DNaseI HS |            |           |       |            | ENCODE          | 1000 | 36768020 | 36768270 |
|           |            |           |       | Hlf        | TransFac        | 2.4  | 36768262 | 36768272 |
|           |            |           |       | ATF-2      | TransFac        | 2.5  | 36768263 | 36768271 |
| DNaseI HS |            |           |       |            | ENCODE          | 112  | 36768660 | 36768810 |
| DNaseI HS |            |           |       |            | ENCODE          | 128  | 36768960 | 36769170 |
|           | rs2395656  | Genotyped | 0.656 |            |                 |      | 36770149 |          |

### 11q13.4 (rs3824999)

| Gene region | rsID       | SNP type  | P-value  | TF type | Source          | Score | Chrom start | Chrom end |
|-------------|------------|-----------|----------|---------|-----------------|-------|-------------|-----------|
|             | rs11236148 | Genotyped | 9.17E-03 |         |                 |       | 73941983    |           |
| DNaseI HS   |            |           |          |         | ENCODE          | 91    | 73942260    | 73942510  |
|             | rs1655483  | Genotyped | 0.034    |         |                 |       | 73942425    |           |
|             | rs1783200  | Imputed   | 2.81E-03 |         |                 |       | 73942542    |           |
|             | rs7930294  | Imputed   | 0.745    |         |                 |       | 73942862    |           |
|             | rs1791495  | Imputed   | 6.62E-05 |         |                 |       | 73943628    |           |
|             | rs2887046  | Genotyped | 0.379    |         |                 |       | 73943674    |           |
|             | rs4044287  | Imputed   | 0.133    |         |                 |       | 73944835    |           |
|             |            |           |          | PU.1    | ENCODE ChIP-seq | 355   | 73946169    | 73946357  |
|             | rs12795302 | Imputed   | 1.50E-03 |         |                 |       | 73946320    |           |
|             | rs12801229 | Imputed   | 9.35E-04 |         |                 |       | 73946819    |           |
|             | rs1292504  | Genotyped | 1.56E-06 |         |                 |       | 73947278    |           |
|             | rs3902018  | Genotyped | 1.52E-03 |         |                 |       | 73947465    |           |
|             | rs10793091 | Imputed   | 0.195    |         |                 |       | 73947740    |           |
| DNaseI HS   |            |           |          |         | ENCODE          | 98    | 73947940    | 73948230  |
|             | rs10501416 | Imputed   | 1.40E-03 |         |                 |       | 73947977    |           |

|           |            |           |          |       |                 |      |          |          |
|-----------|------------|-----------|----------|-------|-----------------|------|----------|----------|
|           |            |           |          | p300  | ENCODE ChIP-seq | 730  | 73948212 | 73948661 |
|           |            |           |          | RXRA  | ENCODE ChIP-seq | 218  | 73948221 | 73948637 |
|           |            |           |          | FOSL2 | ENCODE ChIP-seq | 157  | 73948226 | 73948906 |
| DNaseI HS |            |           |          |       | ENCODE          | 385  | 73948300 | 73948670 |
|           |            |           |          | c-Jun | ENCODE ChIP-seq | 200  | 73948379 | 73948973 |
|           |            |           |          | Elk-1 | TransFac        | 2.38 | 73948476 | 73948492 |
|           |            |           |          | CREB  | TransFac        | 2.2  | 73948667 | 73948679 |
|           |            |           |          | ATF-2 | TransFac        | 2    | 73948669 | 73948677 |
| DNaseI HS |            |           |          |       | ENCODE          | 356  | 73948700 | 73948930 |
|           |            |           |          | JunD  | ENCODE ChIP-seq | 647  | 73948853 | 73948869 |
|           | rs4315111  | Imputed   | 0.173    |       |                 |      | 73949244 |          |
|           | rs7947451  | Imputed   | 0.172    |       |                 |      | 73949417 |          |
|           | rs11236152 | Imputed   | 0.171    |       |                 |      | 73949906 |          |
|           | rs7130461  | Imputed   | 0.170    |       |                 |      | 73950487 |          |
|           | rs7941941  | Genotyped | 0.180    |       |                 |      | 73951606 |          |
|           | rs7929392  | Imputed   | 0.168    |       |                 |      | 73951655 |          |
|           | rs4439539  | Imputed   | 0.174    |       |                 |      | 73951677 |          |
|           | rs10899007 | Imputed   | 0.134    |       |                 |      | 73952433 |          |
| DNaseI HS |            |           |          |       | ENCODE          | 182  | 73953120 | 73953410 |
|           |            |           |          | FAC1  | TransFac        | 2.72 | 73953403 | 73953417 |
|           |            |           |          | FOXL1 | TransFac        | 2.39 | 73953420 | 73953436 |
|           |            |           |          | NFKB  | ENCODE ChIP-seq | 332  | 73953472 | 73953835 |
|           |            |           |          | USF-1 | ENCODE ChIP-seq | 119  | 73953534 | 73953681 |
|           | rs6592568  | Imputed   | 0.026    |       |                 |      | 73953542 |          |
| DNaseI HS |            |           |          |       | ENCODE          | 150  | 73953760 | 73953930 |
|           | rs10899009 | Imputed   | 3.50E-07 |       |                 |      | 73953815 |          |
|           | rs11604752 | Imputed   | 3.48E-07 |       |                 |      | 73954792 |          |
| DNaseI HS |            |           |          |       | ENCODE          | 280  | 73955180 | 73955510 |
|           |            |           |          | NFKB  | ENCODE ChIP-seq | 107  | 73955296 | 73955593 |
| DNaseI HS |            |           |          |       | ENCODE          | 208  | 73955660 | 73955810 |
|           | rs4944047  | Imputed   | 0.011    |       |                 |      | 73955738 |          |
|           | rs1433969  | Imputed   | 0.029    |       |                 |      | 73956081 |          |
| DNaseI HS |            |           |          |       | ENCODE          | 173  | 73956160 | 73956310 |
|           |            |           |          | MRF-2 | TransFac        | 1.97 | 73956182 | 73956196 |
|           |            |           |          | CUTL1 | TransFac        | 1.8  | 73956343 | 73956358 |
|           |            |           |          | Cdc5  | TransFac        | 1.65 | 73956353 | 73956365 |
|           | rs10793092 | Imputed   | 4.91E-07 |       |                 |      | 73956355 |          |
|           |            |           |          | Pbx1a | TransFac        | 1.71 | 73956355 | 73956370 |
|           | rs11826567 | Imputed   | 8.74E-03 |       |                 |      | 73956941 |          |
|           | rs7943504  | Imputed   | 8.72E-03 |       |                 |      | 73957654 |          |
|           | rs7121958  | Imputed   | 3.42E-07 |       |                 |      | 73957660 |          |
|           | rs4944903  | Genotyped | 0.203    |       |                 |      | 73957984 |          |
|           | rs6592570  | Imputed   | 1.13E-03 |       |                 |      | 73958558 |          |
|           | rs1971114  | Imputed   | 0.026    |       |                 |      | 73959054 |          |
|           |            |           |          | Rad21 | ENCODE ChIP-seq | 734  | 73959143 | 73959606 |
|           |            |           |          | CTCF  | ENCODE ChIP-seq | 1000 | 73959184 | 73959578 |
|           |            |           |          | NFKB  | ENCODE ChIP-seq | 51   | 73959261 | 73959526 |
| DNaseI HS |            |           |          |       | ENCODE          | 352  | 73959280 | 73959570 |
|           | rs7952661  | Imputed   | 0.026    |       |                 |      | 73959425 |          |
|           | rs7937232  | Imputed   | 0.025    |       |                 |      | 73959558 |          |
|           | rs72991606 | Imputed   | 3.16E-05 |       |                 |      | 73959768 |          |
|           | rs1433972  | Imputed   | 1.59E-03 |       |                 |      | 73960574 |          |
|           | rs10751238 | Imputed   | 0.036    |       |                 |      | 73960645 |          |
|           | rs10751239 | Imputed   | 0.026    |       |                 |      | 73960646 |          |
|           | rs11236154 | Imputed   | 0.026    |       |                 |      | 73960818 |          |
|           | rs7113533  | Genotyped | 0.064    |       |                 |      | 73961919 |          |
|           | rs4944904  | Imputed   | 0.026    |       |                 |      | 73963540 |          |
|           | rs10899010 | Imputed   | 0.026    |       |                 |      | 73963794 |          |

|           |                   |                |                 |          |                 |      |                 |          |
|-----------|-------------------|----------------|-----------------|----------|-----------------|------|-----------------|----------|
|           |                   |                |                 | MyoD     | TransFac        | 1.93 | 73965508        | 73965518 |
|           | rs4944048         | Imputed        | 0.027           |          |                 |      | 73965974        |          |
|           |                   |                |                 | Sox9     | TransFac        | 3.43 | 73966031        | 73966045 |
|           | rs12290016        | Imputed        | 1.26E-03        |          |                 |      | 73966297        |          |
|           |                   |                |                 | BCL3     | ENCODE ChIP-seq | 412  | 73966348        | 73966661 |
|           | rs36005373        | Imputed        | 7.91E-03        |          |                 |      | 73966365        |          |
|           |                   |                |                 | Pbx3     | ENCODE ChIP-seq | 151  | 73966379        | 73966589 |
|           | rs9665746         | Imputed        | 2.47E-03        |          |                 |      | 73966534        |          |
|           | rs9667597         | Imputed        | 2.47E-03        |          |                 |      | 73966555        |          |
|           | rs4944906         | Imputed        | 2.47E-03        |          |                 |      | 73966570        |          |
| DNaseI HS |                   |                |                 |          | ENCODE          | 497  | 73966780        | 73966990 |
|           | rs35165052        | Imputed        | 0.083           |          |                 |      | 73967273        |          |
|           | <b>rs11236158</b> | <b>Imputed</b> | <b>3.44E-07</b> |          |                 |      | <b>73967376</b> |          |
|           |                   |                |                 | CUTL1    | TransFac        | 2.63 | 73968423        | 73968438 |
|           | rs9919665         | Imputed        | 1.32E-03        |          |                 |      | 73968469        |          |
|           |                   |                |                 | FOXD1    | TransFac        | 1.76 | 73968479        | 73968495 |
|           |                   |                |                 | FOXO4    | TransFac        | 2.34 | 73968481        | 73968495 |
|           | rs9919666         | Genotyped      | 8.52E-03        |          |                 |      | 73968529        |          |
|           | rs10793093        | Genotyped      | 2.10E-04        |          |                 |      | 73968600        |          |
|           | rs4944907         | Imputed        | 2.85E-03        |          |                 |      | 73969005        |          |
|           | <b>rs11236161</b> | <b>Imputed</b> | <b>2.41E-07</b> |          |                 |      | <b>73969361</b> |          |
|           |                   |                |                 | PU.1     | ENCODE ChIP-seq | 502  | 73969746        | 73970154 |
|           |                   |                |                 | IRF4     | ENCODE ChIP-seq | 674  | 73969799        | 73970284 |
|           |                   |                |                 | SP1      | ENCODE ChIP-seq | 189  | 73969821        | 73970217 |
| DNaseI HS |                   |                |                 |          | ENCODE          | 468  | 73969840        | 73970190 |
|           |                   |                |                 | PAX5-N19 | ENCODE ChIP-seq | 221  | 73969851        | 73970326 |
|           |                   |                |                 | BATF     | ENCODE ChIP-seq | 1000 | 73969858        | 73970236 |
|           |                   |                |                 | BCL11A   | ENCODE ChIP-seq | 380  | 73969874        | 73970202 |
|           |                   |                |                 | NFKB     | ENCODE ChIP-seq | 85   | 73969904        | 73970215 |
|           |                   |                |                 | PAX5-C20 | ENCODE ChIP-seq | 98   | 73969975        | 73970268 |
|           | <b>rs60085010</b> | <b>Imputed</b> | <b>2.39E-07</b> |          |                 |      | <b>73970261</b> |          |
|           | rs9919663         | Imputed        | 7.40E-03        |          |                 |      | 73970373        |          |
|           | rs7935260         | Imputed        | 0.024           |          |                 |      | 73971187        |          |
|           | rs7938931         | Imputed        | 0.024           |          |                 |      | 73971868        |          |
|           | rs7939930         | Genotyped      | 8.57E-03        |          |                 |      | 73972014        |          |
|           | rs12292725        | Imputed        | 4.82E-03        |          |                 |      | 73972273        |          |
|           | rs7929876         | Imputed        | 0.024           |          |                 |      | 73972419        |          |
|           | rs11236164        | Genotyped      | 1.13E-04        |          |                 |      | 73972614        |          |
|           |                   |                |                 | Rad21    | ENCODE ChIP-seq | 228  | 73972786        | 73972969 |
|           |                   |                |                 | AP-2rep  | TransFac        | 2.23 | 73972888        | 73972895 |
|           | rs12364155        | Imputed        | 5.60E-03        |          |                 |      | 73973383        |          |
|           | rs7934776         | Imputed        | 4.91E-03        |          |                 |      | 73974498        |          |
|           |                   |                |                 | FOXC1    | TransFac        | 2.12 | 73975129        | 73975145 |
|           | rs34222102        | Imputed        | 3.16E-03        |          |                 |      | 73975606        |          |
|           | rs4417306         | Imputed        | 4.98E-03        |          |                 |      | 73975658        |          |
|           | rs4573702         | Imputed        | 4.99E-03        |          |                 |      | 73977147        |          |
|           | rs4627114         | Imputed        | 0.024           |          |                 |      | 73977466        |          |
|           | rs4335575         | Imputed        | 5.01E-03        |          |                 |      | 73977488        |          |
|           | rs34835838        | Imputed        | 0.046           |          |                 |      | 73977658        |          |
|           | rs10899012        | Imputed        | 3.11E-03        |          |                 |      | 73977882        |          |
|           | <b>rs72977282</b> | <b>Imputed</b> | <b>1.34E-07</b> |          |                 |      | <b>73978089</b> |          |
|           | rs7944514         | Imputed        | 3.46E-03        |          |                 |      | 73978840        |          |
| DNaseI HS |                   |                |                 |          | ENCODE          | 199  | 73979320        | 73979490 |
|           | rs11236165        | Imputed        | 5.09E-03        |          |                 |      | 73979918        |          |
|           | rs12362729        | Imputed        | 0.053           |          |                 |      | 73979965        |          |
| DNaseI HS |                   |                |                 |          | ENCODE          | 120  | 73980260        | 73980410 |
|           |                   |                |                 | STAT1    | ENCODE ChIP-seq | 921  | 73980589        | 73980597 |
|           |                   |                |                 | BAF170   | ENCODE ChIP-seq | 441  | 73980630        | 73980941 |

|                |            |           |          |           |                 |          |          |          |
|----------------|------------|-----------|----------|-----------|-----------------|----------|----------|----------|
| DNaseI HS      |            |           |          | ENCODE    | 121             | 73980800 | 73981050 |          |
|                |            |           |          | NFKB      | ENCODE ChIP-seq | 185      | 73981001 | 73981966 |
|                |            |           |          | STAT1     | ENCODE ChIP-seq | 60       | 73981011 | 73982132 |
|                |            |           |          | c-Myc     | ENCODE ChIP-seq | 365      | 73981018 | 73981981 |
|                |            |           |          | FOSL2     | ENCODE ChIP-seq | 126      | 73981022 | 73981396 |
|                |            |           |          | TAF1      | ENCODE ChIP-seq | 829      | 73981049 | 73981862 |
|                |            |           |          | HEY1      | ENCODE ChIP-seq | 233      | 73981052 | 73981611 |
|                |            |           |          | JunD      | ENCODE ChIP-seq | 97       | 73981059 | 73981355 |
|                |            |           |          | Sin3Ak-20 | ENCODE ChIP-seq | 1000     | 73981062 | 73981399 |
|                |            |           |          | SP1       | ENCODE ChIP-seq | 240      | 73981065 | 73981433 |
|                |            |           |          | HNF4A     | ENCODE ChIP-seq | 388      | 73981065 | 73981400 |
|                |            |           |          | TCF12     | ENCODE ChIP-seq | 177      | 73981072 | 73981400 |
|                |            |           |          | CEBPB     | ENCODE ChIP-seq | 153      | 73981079 | 73981941 |
|                |            |           |          | USF-1     | ENCODE ChIP-seq | 66       | 73981080 | 73981338 |
|                |            |           |          | Max       | ENCODE ChIP-seq | 528      | 73981082 | 73982034 |
|                |            |           |          | IRF4      | ENCODE ChIP-seq | 301      | 73981084 | 73981496 |
|                |            |           |          | Ini1      | ENCODE ChIP-seq | 207      | 73981085 | 73982092 |
|                |            |           |          | POU2F2    | ENCODE ChIP-seq | 378      | 73981086 | 73981577 |
|                |            |           |          | NRSF      | ENCODE ChIP-seq | 684      | 73981099 | 73981423 |
|                |            |           |          | BAF155    | ENCODE ChIP-seq | 622      | 73981104 | 73982086 |
|                |            |           |          | BATF      | ENCODE ChIP-seq | 73       | 73981111 | 73981345 |
| DNaseI HS      |            |           |          | ENCODE    | 1000            | 73981120 | 73981350 |          |
|                |            |           |          | HSF1      | ENCODE ChIP-seq | 274      | 73981126 | 73981546 |
|                |            |           |          | p300      | ENCODE ChIP-seq | 183      | 73981127 | 73981365 |
| POLD3 Exon 1   |            |           |          |           |                 | 73981277 | 73981411 |          |
|                |            |           |          | E2F       | TransFac        | 2.57     | 73981281 | 73981289 |
|                |            |           |          | BAF170    | ENCODE ChIP-seq | 572      | 73981296 | 73982112 |
| POLD3 Intron 1 |            |           |          |           |                 | 73981412 | 73982753 |          |
|                | rs2298572  | Imputed   | 0.025    |           |                 | 73981489 |          |          |
| DNaseI HS      |            |           |          | ENCODE    | 489             | 73981520 | 73981950 |          |
| DNaseI HS      |            |           |          | ENCODE    | 106             | 73981958 | 73982150 |          |
|                | rs7939226  | Genotyped | 0.082    |           |                 | 73982157 |          |          |
|                |            |           |          | p300      | ENCODE ChIP-seq | 105      | 73982168 | 73982433 |
| DNaseI HS      |            |           |          | ENCODE    | 107             | 73982260 | 73982450 |          |
|                |            |           |          | BAF170    | ENCODE ChIP-seq | 643      | 73982322 | 73982497 |
|                |            |           |          | NFKB      | ENCODE ChIP-seq | 164      | 73982329 | 73982375 |
| POLD3 Exon 2   |            |           |          |           |                 | 73982754 | 73982809 |          |
| POLD3 Intron 2 |            |           |          |           |                 | 73982810 | 73993384 |          |
|                |            |           |          | PAX5-C20  | ENCODE ChIP-seq | 83       | 73983298 | 73983567 |
|                | rs4944049  | Imputed   | 0.024    |           |                 | 73984058 |          |          |
|                | rs4944050  | Imputed   | 0.024    |           |                 | 73984142 |          |          |
|                | rs7125480  | Imputed   | 5.47E-03 |           |                 | 73984436 |          |          |
|                | rs4944911  | Imputed   | 0.024    |           |                 | 73985706 |          |          |
| DNaseI HS      |            |           |          | ENCODE    | 82              | 73986160 | 73986330 |          |
|                | rs61901537 | Imputed   | 3.05E-03 |           |                 | 73986667 |          |          |
|                | rs10899013 | Genotyped | 6.19E-03 |           |                 | 73987190 |          |          |
|                | rs61901538 | Imputed   | 5.86E-03 |           |                 | 73988107 |          |          |
|                | rs7934321  | Imputed   | 0.024    |           |                 | 73988327 |          |          |
|                | rs7934742  | Imputed   | 0.023    |           |                 | 73988699 |          |          |
|                | rs12801024 | Imputed   | 6.10E-03 |           |                 | 73989133 |          |          |
|                | rs34702292 | Imputed   | 3.35E-03 |           |                 | 73989272 |          |          |
|                | rs34060848 | Imputed   | 0.091    |           |                 | 73989315 |          |          |
|                | rs7932731  | Imputed   | 6.17E-03 |           |                 | 73989436 |          |          |
|                |            |           |          | BAF170    | ENCODE ChIP-seq | 1000     | 73989805 | 73989986 |
|                |            |           |          | POU3F2    | TransFac        | 2.6      | 73989932 | 73989942 |
|                | rs6592573  | Imputed   | 6.49E-03 |           |                 | 73990610 |          |          |
|                | rs7925556  | Imputed   | 0.025    |           |                 | 73990935 |          |          |
|                |            |           |          | POU2F1    | TransFac        | 1.82     | 73991924 | 73991937 |

|                |            |           |          |         |                 |          |          |          |
|----------------|------------|-----------|----------|---------|-----------------|----------|----------|----------|
| DNaseI HS      |            |           |          | ENCODE  | 68              | 73991960 | 73992210 |          |
|                | rs61901540 | Imputed   | 0.051    |         |                 | 73992513 |          |          |
|                |            |           |          | RSRFC4  | TransFac        | 1.77     | 73993128 | 73993144 |
| POLD3 Exon 3   |            |           |          |         |                 | 73993385 | 73993487 |          |
|                |            |           |          | HSF1    | TransFac        | 1.79     | 73993417 | 73993427 |
|                |            |           |          | E47     | TransFac        | 3.26     | 73993450 | 73993466 |
| POLD3 Intron 3 |            |           |          |         |                 | 73993488 | 74000191 |          |
|                |            |           |          | PU.1    | ENCODE ChIP-seq | 470      | 73994088 | 73994445 |
|                |            |           |          | EBF     | ENCODE ChIP-seq | 266      | 73994134 | 73994456 |
| DNaseI HS      |            |           |          | ENCODE  | 63              | 73994700 | 73994850 |          |
|                | rs7940880  | Imputed   | 1.54E-06 |         |                 | 73995062 |          |          |
|                | rs11236171 | Imputed   | 0.051    |         |                 | 73995166 |          |          |
|                | rs61901541 | Imputed   | 0.080    |         |                 | 73995633 |          |          |
|                | rs7124188  | Imputed   | 1.28E-06 |         |                 | 73995994 |          |          |
|                |            |           |          | CEBPB   | ENCODE ChIP-seq | 890      | 73998625 | 73998873 |
|                |            |           |          | RXRA    | ENCODE ChIP-seq | 225      | 73998635 | 73998801 |
|                | rs4944912  | Imputed   | 1.36E-03 |         |                 | 73998929 |          |          |
|                | rs4944913  | Imputed   | 6.69E-03 |         |                 | 73998997 |          |          |
|                | rs4944914  | Imputed   | 1.37E-03 |         |                 | 73999053 |          |          |
|                | rs12296094 | Imputed   | 0.027    |         |                 | 73999348 |          |          |
|                | rs4944915  | Imputed   | 0.018    |         |                 | 73999612 |          |          |
|                | rs4944916  | Imputed   | 0.018    |         |                 | 73999688 |          |          |
|                |            |           |          | CTCF    | ENCODE ChIP-seq | 155      | 73999999 | 74000392 |
| DNaseI HS      |            |           |          | ENCODE  | 866             | 74000080 | 74000590 |          |
|                |            |           |          | Rad21   | ENCODE ChIP-seq | 267      | 74000105 | 74000338 |
|                |            |           |          | Ini1    | ENCODE ChIP-seq | 786      | 74000156 | 74000372 |
| POLD3 Exon 4   |            |           |          |         |                 | 74000192 | 74000231 |          |
| POLD3 Intron 4 |            |           |          |         |                 | 74000232 | 74001570 |          |
|                | rs6592574  | Genotyped | 5.43E-04 |         |                 | 74000610 |          |          |
|                | rs6592575  | Imputed   | 0.019    |         |                 | 74000654 |          |          |
|                | rs7122710  | Imputed   | 0.052    |         |                 | 74000823 |          |          |
|                | rs4944917  | Imputed   | 0.049    |         |                 | 74000929 |          |          |
|                |            |           |          | CREB    | TransFac        | 1.67     | 74001330 | 74001345 |
|                |            |           |          | E47     | TransFac        | 1.93     | 74001341 | 74001357 |
| POLD3 Exon 5   |            |           |          |         |                 | 74001571 | 74001703 |          |
|                |            |           |          | LUN-1   | TransFac        | 1.92     | 74001577 | 74001594 |
| DNaseI HS      |            |           |          | ENCODE  | 259             | 74001640 | 74001850 |          |
|                |            |           |          | AP-2rep | TransFac        | 2.23     | 74001640 | 74001647 |
|                |            |           |          | MRF-2   | TransFac        | 2.29     | 74001650 | 74001664 |
|                |            |           |          | TBP     | TransFac        | 1.92     | 74001672 | 74001682 |
| POLD3 Intron 5 |            |           |          |         |                 | 74001704 | 74007229 |          |
|                |            |           |          | Nkx3-1  | TransFac        | 1.74     | 74001839 | 74001851 |
|                | rs10219203 | Genotyped | 3.66E-04 |         |                 | 74002571 |          |          |
|                | rs10899014 | Imputed   | 0.057    |         |                 | 74002757 |          |          |
|                | rs4944051  | Imputed   | 0.053    |         |                 | 74002983 |          |          |
|                | rs7120069  | Imputed   | 0.018    |         |                 | 74003036 |          |          |
|                | rs7130839  | Imputed   | 3.05E-03 |         |                 | 74003231 |          |          |
|                | rs7101472  | Imputed   | 3.06E-03 |         |                 | 74003265 |          |          |
|                | rs4584608  | Imputed   | 0.018    |         |                 | 74003296 |          |          |
|                | rs4996254  | Imputed   | 1.66E-03 |         |                 | 74003306 |          |          |
|                |            |           |          | Input   | ENCODE ChIP-seq | 252      | 74003652 | 74003836 |
|                |            |           |          | PU.1    | ENCODE ChIP-seq | 473      | 74004062 | 74004339 |
| DNaseI HS      |            |           |          | ENCODE  | 356             | 74004080 | 74004310 |          |
|                | rs6592576  | Imputed   | 0.018    |         |                 | 74004469 |          |          |
|                | rs7932194  | Imputed   | 0.027    |         |                 | 74005026 |          |          |
|                | rs6592577  | Genotyped | 0.021    |         |                 | 74005262 |          |          |
|                |            |           |          | AP-2rep | TransFac        | 2.23     | 74005292 | 74005299 |
|                |            |           |          | E47     | TransFac        | 1.81     | 74005614 | 74005630 |

|                |            |           |          |         |                 |      |          |          |
|----------------|------------|-----------|----------|---------|-----------------|------|----------|----------|
|                | rs10899015 | Imputed   | 1.71E-03 |         |                 |      | 74006732 |          |
| POLD3 Exon 6   |            |           |          |         |                 |      | 74007230 | 74007497 |
|                | rs4944052  | Imputed   | 1.67E-03 |         |                 |      | 74007263 |          |
|                |            |           |          | CUTL1   | TransFac        | 2.36 | 74007355 | 74007370 |
|                |            |           |          | E47     | TransFac        | 1.78 | 74007367 | 74007382 |
| POLD3 Intron 6 |            |           |          |         |                 |      | 74007498 | 74008709 |
|                | rs7943085  | Imputed   | 1.59E-03 |         |                 |      | 74007856 |          |
|                | rs7944208  | Imputed   | 1.62E-03 |         |                 |      | 74008042 |          |
|                | rs11236172 | Imputed   | 0.050    |         |                 |      | 74008536 |          |
|                | rs10501417 | Imputed   | 1.53E-03 |         |                 |      | 74008628 |          |
| DNaseI HS      |            |           |          |         | ENCODE          | 70   | 74008680 | 74008850 |
| POLD3 Exon 7   |            |           |          |         |                 |      | 74008710 | 74008782 |
| POLD3 Intron 7 |            |           |          |         |                 |      | 74008783 | 74014100 |
| DNaseI HS      |            |           |          |         | ENCODE          | 211  | 74009340 | 74009530 |
|                | rs4145953  | Genotyped | 0.042    |         |                 |      | 74009527 |          |
|                | rs10899016 | Imputed   | 0.018    |         |                 |      | 74009849 |          |
|                | rs11236173 | Imputed   | 1.38E-03 |         |                 |      | 74009910 |          |
|                | rs12288519 | Imputed   | 1.45E-03 |         |                 |      | 74010227 |          |
|                | rs12288525 | Imputed   | 0.026    |         |                 |      | 74010237 |          |
|                | rs12287097 | Imputed   | 0.050    |         |                 |      | 74010312 |          |
|                | rs12280434 | Imputed   | 0.026    |         |                 |      | 74010475 |          |
|                | rs59768581 | Imputed   | 1.55E-06 |         |                 |      | 74010784 |          |
|                | rs10899017 | Imputed   | 0.050    |         |                 |      | 74010945 |          |
|                | rs12807398 | Imputed   | 0.046    |         |                 |      | 74011387 |          |
|                | rs11236174 | Imputed   | 0.050    |         |                 |      | 74011849 |          |
|                | rs11236175 | Imputed   | 1.30E-03 |         |                 |      | 74011992 |          |
|                | rs11236176 | Imputed   | 1.30E-03 |         |                 |      | 74011996 |          |
|                | rs10899018 | Imputed   | 1.28E-03 |         |                 |      | 74012303 |          |
|                | rs10899019 | Imputed   | 0.026    |         |                 |      | 74012810 |          |
|                |            |           |          | RSRFC4  | TransFac        | 1.92 | 74013247 | 74013263 |
|                | rs10899020 | Imputed   | 1.14E-06 |         |                 |      | 74013417 |          |
|                | rs10793094 | Imputed   | 1.14E-06 |         |                 |      | 74013473 |          |
| POLD3 Exon 8   |            |           |          |         |                 |      | 74014101 | 74014266 |
| POLD3 Intron 8 |            |           |          |         |                 |      | 74014267 | 74017909 |
|                |            |           |          | Input   | ENCODE ChIP-seq | 184  | 74014337 | 74014513 |
|                |            |           |          | FOXO4   | TransFac        | 2.11 | 74014658 | 74014672 |
|                |            |           |          | Lmo2    | TransFac        | 2.18 | 74014830 | 74014839 |
|                |            |           |          | AP-2rep | TransFac        | 2.23 | 74014929 | 74014936 |
|                | rs2117222  | Imputed   | 9.76E-07 |         |                 |      | 74015333 |          |
|                | rs10899021 | Imputed   | 0.056    |         |                 |      | 74015702 |          |
|                | rs57796856 | Imputed   | 9.24E-07 |         |                 |      | 74016003 |          |
|                |            |           |          | BATF    | ENCODE ChIP-seq | 80   | 74016179 | 74016359 |
|                | rs59830047 | Imputed   | 9.09E-07 |         |                 |      | 74016183 |          |
|                |            |           |          | NFKB    | ENCODE ChIP-seq | 152  | 74016209 | 74016400 |
|                | rs11236177 | Imputed   | 0.027    |         |                 |      | 74016715 |          |
|                | rs1433970  | Imputed   | 0.035    |         |                 |      | 74016841 |          |
|                | rs10899022 | Imputed   | 0.027    |         |                 |      | 74017034 |          |
|                | rs2155935  | Imputed   | 8.04E-07 |         |                 |      | 74017225 |          |
|                | rs2298792  | Imputed   | 7.40E-07 |         |                 |      | 74017844 |          |
|                |            |           |          | Nkx3-1  | TransFac        | 2.13 | 74017852 | 74017864 |
| POLD3 Exon 9   |            |           |          |         |                 |      | 74017910 | 74018016 |
|                |            |           |          | IRF-7A  | TransFac        | 2.56 | 74017943 | 74017961 |
| POLD3 Intron 9 |            |           |          |         |                 |      | 74018017 | 74023275 |
|                |            |           |          | PU.1    | ENCODE ChIP-seq | 164  | 74018799 | 74019095 |
|                | rs11236178 | Imputed   | 7.22E-07 |         |                 |      | 74018984 |          |
|                | rs4944053  | Imputed   | 8.30E-04 |         |                 |      | 74019358 |          |
|                |            |           |          | NFKB    | ENCODE ChIP-seq | 281  | 74020374 | 74020707 |
|                |            |           |          | BATF    | ENCODE ChIP-seq | 135  | 74020409 | 74020651 |

|                 |                   |                  |                 |        |                 |          |                 |
|-----------------|-------------------|------------------|-----------------|--------|-----------------|----------|-----------------|
| DNaseI HS       |                   |                  |                 | ENCODE | 877             | 74020440 | 74020630        |
|                 | rs11236180        | Genotyped        | 0.329           |        |                 | 74020576 |                 |
|                 |                   |                  |                 | E47    | TransFac        | 2.02     | 74020704        |
|                 |                   |                  |                 | STAT3  | TransFac        | 2.09     | 74020898        |
| DNaseI HS       |                   |                  |                 | ENCODE | 95              | 74021640 | 74021790        |
|                 |                   |                  |                 | IRF-7A | TransFac        | 2.23     | 74022227        |
|                 |                   |                  |                 | POU2F1 | TransFac        | 1.74     | 74022231        |
| DNaseI HS       |                   |                  |                 | ENCODE | 83              | 74022240 | 74022430        |
|                 |                   |                  |                 | AREB6  | TransFac        | 2.31     | 74022258        |
|                 |                   |                  |                 | AML1a  | TransFac        | 1.68     | 74022307        |
|                 |                   |                  |                 | Lmo2   | TransFac        | 2.05     | 74022507        |
|                 |                   |                  |                 | JunD   | ENCODE ChIP-seq | 173      | 74023143        |
|                 |                   |                  |                 | c-Jun  | ENCODE ChIP-seq | 176      | 74023188        |
|                 | <b>rs3824999</b>  | <b>Genotyped</b> | <b>1.49E-06</b> |        |                 |          | <b>74023198</b> |
| DNaseI HS       |                   |                  |                 | ENCODE | 1000            | 74023200 | 74023570        |
|                 |                   |                  |                 | ISGF-3 | TransFac        | 2.26     | 74023258        |
| POLD3 Exon 10   |                   |                  |                 |        |                 | 74023276 | 74023388        |
|                 |                   |                  |                 | CTCF   | ENCODE ChIP-seq | 564      | 74023287        |
|                 |                   |                  |                 | Meis-1 | TransFac        | 1.97     | 74023377        |
|                 |                   |                  |                 | Rad21  | ENCODE ChIP-seq | 133      | 74023382        |
| POLD3 Intron 10 |                   |                  |                 |        |                 | 74023389 | 74024889        |
|                 |                   |                  |                 | STAT1  | ENCODE ChIP-seq | 130      | 74023407        |
|                 | rs11236181        | Genotyped        | 0.072           |        |                 | 74023471 |                 |
|                 |                   |                  |                 | AREB6  | TransFac        | 1.9      | 74023555        |
|                 | <b>rs11236182</b> | <b>Imputed</b>   | <b>5.40E-07</b> |        |                 |          | <b>74024170</b> |
| DNaseI HS       |                   |                  |                 | ENCODE | 144             | 74024180 | 74024370        |
|                 | rs10899023        | Imputed          | 1.42E-03        |        |                 | 74024340 |                 |
|                 | rs3741127         | Imputed          | 0.173           |        |                 | 74024581 |                 |
| POLD3 Exon 11   |                   |                  |                 |        |                 | 74024890 | 74024968        |
| POLD3 Intron 11 |                   |                  |                 |        |                 | 74024969 | 74029256        |
|                 | rs4944920         | Imputed          | 0.011           |        |                 | 74025082 |                 |
|                 |                   |                  |                 | c-Jun  | ENCODE ChIP-seq | 1000     | 74025218        |
|                 |                   |                  |                 | JunD   | ENCODE ChIP-seq | 569      | 74025265        |
|                 |                   |                  |                 | c-Fos  | ENCODE ChIP-seq | 386      | 74025373        |
|                 |                   |                  |                 | Max    | ENCODE ChIP-seq | 578      | 74025392        |
|                 |                   |                  |                 | BAF170 | ENCODE ChIP-seq | 464      | 74025399        |
| DNaseI HS       |                   |                  |                 | ENCODE | 1000            | 74025420 | 74025690        |
|                 |                   |                  |                 | BAF155 | ENCODE ChIP-seq | 405      | 74025425        |
|                 |                   |                  |                 | c-Myc  | ENCODE ChIP-seq | 179      | 74025452        |
|                 | rs7112384         | Imputed          | 0.068           |        |                 | 74025853 |                 |
|                 | rs7112664         | Imputed          | 0.068           |        |                 | 74026074 |                 |
|                 | rs7936385         | Imputed          | 1.59E-03        |        |                 | 74027598 |                 |
| DNaseI HS       |                   |                  |                 | ENCODE | 237             | 74027680 | 74027870        |
|                 |                   |                  |                 | Input  | ENCODE ChIP-seq | 293      | 74027778        |
|                 |                   |                  |                 | CUTL1  | TransFac        | 2.32     | 74028066        |
|                 |                   |                  |                 | Oct-B1 | TransFac        | 2.32     | 74028147        |
| DNaseI HS       |                   |                  |                 | ENCODE | 101             | 74028240 | 74028570        |
|                 |                   |                  |                 | c-Jun  | ENCODE ChIP-seq | 217      | 74028384        |
|                 | rs7925747         | Genotyped        | 0.012           |        |                 | 74028431 |                 |
|                 | rs7925341         | Imputed          | 9.97E-03        |        |                 | 74028736 |                 |
|                 | <b>rs12282266</b> | <b>Imputed</b>   | <b>8.52E-07</b> |        |                 |          | <b>74028972</b> |
|                 |                   |                  |                 | AP-1   | TransFac        | 1.95     | 74029254        |
| POLD3 Exon 12   |                   |                  |                 |        |                 | 74029257 | 74031413        |
|                 |                   |                  |                 | CUTL1  | TransFac        | 2.4      | 74029428        |
|                 |                   |                  |                 | ZIC2   | TransFac        | 2.18     | 74029487        |
|                 |                   |                  |                 | Pax-2  | TransFac        | 1.72     | 74029489        |
|                 |                   |                  |                 | c-Jun  | ENCODE ChIP-seq | 480      | 74029621        |
|                 | rs1051058         | Imputed          | 0.038           |        |                 | 74029849 |                 |

|           |            |           |          |        |                 |          |          |          |
|-----------|------------|-----------|----------|--------|-----------------|----------|----------|----------|
| DNaseI HS |            |           |          | ENCODE | 712             | 74030040 | 74030330 |          |
|           |            |           |          | Brg1   | ENCODE ChIP-seq | 1000     | 74030082 | 74030465 |
|           |            |           |          | c-Jun  | ENCODE ChIP-seq | 250      | 74030124 | 74030426 |
| DNaseI HS |            |           |          | ENCODE | 533             | 74030700 | 74030930 |          |
|           |            |           |          | CREB   | TransFac        | 2.28     | 74030919 | 74030934 |
|           |            |           |          | Bach1  | TransFac        | 2.36     | 74030922 | 74030937 |
|           | rs10857    | Imputed   | 9.91E-03 |        |                 |          | 74031019 |          |
|           | rs1051076  | Genotyped | 0.435    |        |                 |          | 74031247 |          |
| DNaseI HS |            |           |          | ENCODE | 175             | 74031380 | 74031590 |          |
|           |            |           |          | c-Jun  | ENCODE ChIP-seq | 329      | 74031685 | 74032027 |
| DNaseI HS |            |           |          | ENCODE | 62              | 74031760 | 74031937 |          |
|           | rs7947345  | Imputed   | 9.80E-03 |        |                 |          | 74031875 |          |
|           | rs59958321 | Imputed   | 0.052    |        |                 |          | 74032262 |          |
|           | rs7935057  | Imputed   | 9.52E-03 |        |                 |          | 74032431 |          |
|           |            |           |          | SRF    | TransFac        | 2.84     | 74032881 | 74032896 |
|           |            |           |          | CUTL1  | TransFac        | 2.36     | 74032935 | 74032947 |
|           |            |           |          | FOXC1  | TransFac        | 1.85     | 74033117 | 74033133 |
|           |            |           |          | p300   | TransFac        | 1.66     | 74033199 | 74033213 |
|           |            |           |          | LCR-F1 | TransFac        | 2.43     | 74033208 | 74033221 |
|           |            |           |          | ZIC2   | TransFac        | 1.85     | 74033270 | 74033279 |
|           |            |           |          | ZIC2   | TransFac        | 2.33     | 74033284 | 74033293 |
|           |            |           |          | E47    | TransFac        | 1.89     | 74033440 | 74033456 |
|           | rs7123887  | Imputed   | 0.033    |        |                 |          | 74033737 |          |
|           | rs4944921  | Imputed   | 9.30E-03 |        |                 |          | 74034319 |          |
|           | rs4944922  | Imputed   | 0.033    |        |                 |          | 74034353 |          |
|           | rs4944923  | Imputed   | 0.033    |        |                 |          | 74034638 |          |
|           | rs12293317 | Imputed   | 0.105    |        |                 |          | 74034815 |          |
| DNaseI HS |            |           |          | ENCODE | 168             | 74034980 | 74035130 |          |
|           | rs10793095 | Imputed   | 0.010    |        |                 |          | 74035012 |          |
|           | rs1893362  | Imputed   | 9.21E-03 |        |                 |          | 74035085 |          |
|           | rs11236183 | Genotyped | 0.414    |        |                 |          | 74035494 |          |
| DNaseI HS |            |           |          | ENCODE | 75              | 74035740 | 74035910 |          |
|           | rs7102084  | Imputed   | 0.108    |        |                 |          | 74035780 |          |
|           | rs4944054  | Imputed   | 9.11E-03 |        |                 |          | 74036143 |          |
| DNaseI HS |            |           |          | ENCODE | 264             | 74036200 | 74036410 |          |
|           | rs10899024 | Imputed   | 6.81E-05 |        |                 |          | 74036330 |          |
|           | rs7130195  | Imputed   | 0.034    |        |                 |          | 74036574 |          |
|           | rs61900635 | Imputed   | 0.111    |        |                 |          | 74036658 |          |
|           | rs7106219  | Imputed   | 0.034    |        |                 |          | 74036714 |          |
|           | rs4944924  | Imputed   | 9.05E-03 |        |                 |          | 74036946 |          |
|           |            |           |          | PU.1   | ENCODE ChIP-seq | 95       | 74037088 | 74037275 |
|           | rs4944925  | Genotyped | 0.052    |        |                 |          | 74037177 |          |
|           | rs61900636 | Imputed   | 0.113    |        |                 |          | 74037239 |          |
|           | rs4944926  | Imputed   | 8.71E-03 |        |                 |          | 74037464 |          |
|           | rs7932922  | Genotyped | 3.64E-03 |        |                 |          | 74037678 |          |
| DNaseI HS |            |           |          | ENCODE | 374             | 74037720 | 74037890 |          |
|           |            |           |          | CREB   | TransFac        | 2.32     | 74037876 | 74037891 |
|           | rs7110993  | Imputed   | 8.68E-03 |        |                 |          | 74037961 |          |
|           |            |           |          | Nrf1   | ENCODE ChIP-seq | 635      | 74038002 | 74038122 |
|           | rs7122810  | Imputed   | 8.88E-03 |        |                 |          | 74038283 |          |
|           |            |           |          | FOXL1  | TransFac        | 1.78     | 74039225 | 74039241 |
| DNaseI HS |            |           |          | ENCODE | 1000            | 74039260 | 74039470 |          |
|           | rs1944933  | Imputed   | 1.19E-06 |        |                 |          | 74039262 |          |
|           |            |           |          | ITF-2  | TransFac        | 1.77     | 74039308 | 74039324 |
|           |            |           |          | AML1a  | TransFac        | 1.68     | 74039352 | 74039358 |
|           |            |           |          | POU2F1 | TransFac        | 1.69     | 74039353 | 74039368 |
|           |            |           |          | ARP-1  | TransFac        | 1.7      | 74039464 | 74039480 |
|           |            |           |          | p53    | TransFac        | 2        | 74039518 | 74039528 |



|           |            |           |          |        |                 |      |          |          |
|-----------|------------|-----------|----------|--------|-----------------|------|----------|----------|
|           |            |           |          | AP-4   | TransFac        | 1.81 | 74039605 | 74039615 |
|           |            |           |          | FOX11  | TransFac        | 1.97 | 74039634 | 74039647 |
|           |            |           |          | FOXD1  | TransFac        | 3.29 | 74039637 | 74039653 |
|           |            |           |          | FOXC1  | TransFac        | 4.02 | 74039637 | 74039653 |
|           |            |           |          | FOXF2  | TransFac        | 2.77 | 74039637 | 74039653 |
|           |            |           |          | FOXO4  | TransFac        | 2.77 | 74039637 | 74039651 |
|           |            |           |          | NRSF   | ENCODE ChIP-seq | 93   | 74039732 | 74039965 |
|           | rs11236185 | Imputed   | 1.01E-06 |        |                 |      | 74040179 |          |
|           | rs11236186 | Imputed   | 0.116    |        |                 |      | 74040513 |          |
|           | rs4145954  | Imputed   | 6.58E-05 |        |                 |      | 74040814 |          |
|           | rs7934301  | Imputed   | 0.033    |        |                 |      | 74041304 |          |
|           |            |           |          | IRF-7A | TransFac        | 2.19 | 74041350 | 74041368 |
|           | rs7924706  | Imputed   | 6.53E-05 |        |                 |      | 74041492 |          |
|           | rs7935426  | Imputed   | 0.116    |        |                 |      | 74041538 |          |
|           |            |           |          | NRSF   | TransFac        | 2.25 | 74041665 | 74041686 |
|           | rs7924701  | Imputed   | 8.65E-03 |        |                 |      | 74041686 |          |
|           |            |           |          | POU2F1 | TransFac        | 2.41 | 74041782 | 74041797 |
|           |            |           |          | FOXO4  | TransFac        | 1.85 | 74041803 | 74041817 |
|           | rs7937753  | Imputed   | 1.08E-04 |        |                 |      | 74041841 |          |
|           |            |           |          | CUTL1  | TransFac        | 2.07 | 74041920 | 74041935 |
|           | rs6592578  | Imputed   | 0.033    |        |                 |      | 74042175 |          |
|           | rs11236187 | Imputed   | 1.09E-06 |        |                 |      | 74042214 |          |
|           | rs11236188 | Imputed   | 1.09E-06 |        |                 |      | 74042378 |          |
|           | rs11236189 | Imputed   | 1.15E-06 |        |                 |      | 74042418 |          |
|           | rs55719957 | Imputed   | 0.097    |        |                 |      | 74042693 |          |
|           | rs12421418 | Imputed   | 8.54E-03 |        |                 |      | 74042787 |          |
|           | rs12421429 | Imputed   | 1.14E-06 |        |                 |      | 74042833 |          |
|           | rs9651760  | Imputed   | 8.50E-03 |        |                 |      | 74043104 |          |
|           | rs9651761  | Imputed   | 8.48E-03 |        |                 |      | 74043242 |          |
|           | rs9651762  | Imputed   | 8.41E-03 |        |                 |      | 74043298 |          |
|           | rs9651763  | Imputed   | 8.40E-03 |        |                 |      | 74043387 |          |
| DNaseI HS |            |           |          | ENCODE |                 | 152  | 74043780 | 74043970 |
|           | rs6592579  | Genotyped | 8.13E-03 |        |                 |      | 74043979 |          |
|           | rs6592580  | Imputed   | 8.35E-03 |        |                 |      | 74044106 |          |
|           | rs6592581  | Imputed   | 8.33E-03 |        |                 |      | 74044162 |          |
|           | rs11236190 | Imputed   | 0.145    |        |                 |      | 74044403 |          |
|           | rs6592582  | Imputed   | 9.92E-03 |        |                 |      | 74044512 |          |
|           | rs7933770  | Imputed   | 9.94E-03 |        |                 |      | 74044557 |          |
|           | rs10899025 | Imputed   | 0.134    |        |                 |      | 74044688 |          |
|           | rs7118314  | Imputed   | 0.010    |        |                 |      | 74044932 |          |
|           | rs7128944  | Imputed   | 0.010    |        |                 |      | 74045032 |          |
|           | rs7128944  | Imputed   | 6.55E-05 |        |                 |      | 74045033 |          |
|           | rs58659624 | Imputed   | 1.53E-06 |        |                 |      | 74045135 |          |
|           | rs4944928  | Imputed   | 0.010    |        |                 |      | 74045235 |          |
|           | rs12271394 | Imputed   | 0.010    |        |                 |      | 74045291 |          |
|           | rs4944055  | Imputed   | 0.011    |        |                 |      | 74045814 |          |
|           | rs4944929  | Imputed   | 0.011    |        |                 |      | 74045853 |          |
|           | rs11236193 | Imputed   | 0.140    |        |                 |      | 74045955 |          |
|           | rs4944056  | Imputed   | 0.011    |        |                 |      | 74046068 |          |
|           | rs4944930  | Imputed   | 0.011    |        |                 |      | 74046089 |          |
|           | rs61621556 | Imputed   | 0.028    |        |                 |      | 74046227 |          |
|           | rs7103197  | Imputed   | 6.70E-05 |        |                 |      | 74046364 |          |
|           | rs7126573  | Imputed   | 0.011    |        |                 |      | 74046743 |          |
|           | rs10793098 | Imputed   | 6.79E-05 |        |                 |      | 74046995 |          |
|           | rs7106984  | Imputed   | 0.011    |        |                 |      | 74047007 |          |
|           | rs7126957  | Imputed   | 0.011    |        |                 |      | 74047023 |          |
|           | rs7127628  | Imputed   | 0.011    |        |                 |      | 74047532 |          |
|           | rs7127630  | Imputed   | 0.011    |        |                 |      | 74047537 |          |

|           |            |           |          |        |                 |      |  |          |          |
|-----------|------------|-----------|----------|--------|-----------------|------|--|----------|----------|
|           | rs7127668  | Imputed   | 0.011    |        |                 |      |  | 74047800 |          |
|           | rs7111251  | Imputed   | 0.012    |        |                 |      |  | 74047839 |          |
|           | rs7111273  | Imputed   | 0.012    |        |                 |      |  | 74047879 |          |
|           | rs7131096  | Imputed   | 0.012    |        |                 |      |  | 74048004 |          |
|           | rs4514450  | Imputed   | 0.012    |        |                 |      |  | 74048604 |          |
|           | rs4644667  | Imputed   | 7.01E-05 |        |                 |      |  | 74048721 |          |
|           | rs4944931  | Imputed   | 0.012    |        |                 |      |  | 74049014 |          |
|           | rs11236198 | Imputed   | 0.201    |        |                 |      |  | 74049848 |          |
| DNaseI HS |            |           |          |        | ENCODE          | 168  |  | 74049940 | 74050110 |
|           | rs11236199 | Imputed   | 2.29E-06 |        |                 |      |  | 74050133 |          |
|           |            |           |          | USF-1  | ENCODE ChIP-seq | 223  |  | 74051271 | 74051480 |
|           |            |           |          | HNF4A  | ENCODE ChIP-seq | 813  |  | 74051446 | 74051817 |
|           |            |           |          | p300   | ENCODE ChIP-seq | 120  |  | 74051524 | 74051741 |
| DNaseI HS |            |           |          |        | ENCODE          | 68   |  | 74051540 | 74051730 |
|           |            |           |          | ERRA   | ENCODE ChIP-seq | 783  |  | 74051545 | 74051816 |
|           | rs11236200 | Imputed   | 2.60E-06 |        |                 |      |  | 74051588 |          |
|           | rs10219168 | Imputed   | 0.122    |        |                 |      |  | 74052101 |          |
|           | rs4420291  | Imputed   | 2.83E-06 |        |                 |      |  | 74052598 |          |
|           | rs2186955  | Imputed   | 0.110    |        |                 |      |  | 74053123 |          |
|           | rs11236201 | Imputed   | 0.177    |        |                 |      |  | 74053281 |          |
|           | rs7948555  | Imputed   | 0.023    |        |                 |      |  | 74053444 |          |
|           | rs11236202 | Imputed   | 0.183    |        |                 |      |  | 74054340 |          |
| DNaseI HS |            |           |          |        | ENCODE          | 154  |  | 74054880 | 74055030 |
|           | rs10899029 | Imputed   | 3.59E-06 |        |                 |      |  | 74055159 |          |
|           | rs10793101 | Imputed   | 2.45E-05 |        |                 |      |  | 74055394 |          |
|           | rs11236203 | Genotyped | 1.04E-03 |        |                 |      |  | 74055648 |          |
|           | rs4944057  | Imputed   | 0.011    |        |                 |      |  | 74056151 |          |
|           | rs11825804 | Imputed   | 3.88E-06 |        |                 |      |  | 74056519 |          |
|           | rs7109940  | Imputed   | 3.89E-06 |        |                 |      |  | 74056548 |          |
|           | rs4944933  | Imputed   | 0.094    |        |                 |      |  | 74056594 |          |
|           |            |           |          | PU.1   | ENCODE ChIP-seq | 78   |  | 74056773 | 74056895 |
|           | rs1944935  | Imputed   | 0.016    |        |                 |      |  | 74056814 |          |
|           |            |           |          | E47    | TransFac        | 1.78 |  | 74058089 | 74058105 |
|           |            |           |          | Lmo2   | TransFac        | 1.65 |  | 74058091 | 74058103 |
|           |            |           |          | AREB6  | TransFac        | 2.1  |  | 74058091 | 74058103 |
|           |            |           |          | MyoD   | TransFac        | 1.7  |  | 74058092 | 74058102 |
|           |            |           |          | c-Myb  | TransFac        | 3.21 |  | 74058145 | 74058155 |
|           |            |           |          | SRF    | TransFac        | 1.75 |  | 74058350 | 74058365 |
|           | rs6592590  | Genotyped | 3.86E-05 |        |                 |      |  | 74058677 |          |
|           | rs7129492  | Imputed   | 3.65E-05 |        |                 |      |  | 74058829 |          |
|           |            |           |          | BAF155 | ENCODE ChIP-seq | 632  |  | 74060407 | 74060857 |
|           |            |           |          | Ini1   | ENCODE ChIP-seq | 458  |  | 74060450 | 74060526 |
| DNaseI HS |            |           |          |        | ENCODE          | 645  |  | 74060500 | 74060770 |
|           | rs7933422  | Imputed   | 7.65E-03 |        |                 |      |  | 74060954 |          |
| DNaseI HS |            |           |          |        | ENCODE          | 80   |  | 74061120 | 74061330 |
|           |            |           |          | BAF155 | ENCODE ChIP-seq | 752  |  | 74061293 | 74062255 |
|           |            |           |          | c-Myc  | ENCODE ChIP-seq | 255  |  | 74061351 | 74062396 |
|           |            |           |          | Ini1   | ENCODE ChIP-seq | 191  |  | 74061390 | 74062244 |
|           |            |           |          | BAF170 | ENCODE ChIP-seq | 623  |  | 74061390 | 74062314 |
|           |            |           |          | USF-1  | ENCODE ChIP-seq | 84   |  | 74061437 | 74062359 |
|           |            |           |          | GR     | ENCODE ChIP-seq | 916  |  | 74061480 | 74062381 |
|           |            |           |          | JunD   | ENCODE ChIP-seq | 206  |  | 74061504 | 74062392 |
|           |            |           |          | c-Jun  | ENCODE ChIP-seq | 161  |  | 74061556 | 74062388 |
|           |            |           |          | NRSF   | ENCODE ChIP-seq | 127  |  | 74061572 | 74061938 |
|           |            |           |          | TAF1   | ENCODE ChIP-seq | 64   |  | 74061591 | 74061997 |
|           | rs11236207 | Imputed   | 7.47E-03 |        |                 |      |  | 74061645 |          |
| DNaseI HS |            |           |          |        | ENCODE          | 1000 |  | 74061680 | 74061950 |
|           |            |           |          | AP-4   | TransFac        | 1.87 |  | 74061714 | 74061724 |

|           |            |           |          |        |                 |      |          |          |
|-----------|------------|-----------|----------|--------|-----------------|------|----------|----------|
| DNaseI HS |            |           |          |        | ENCODE          | 1000 | 74061960 | 74062330 |
|           |            |           |          | Brg1   | ENCODE ChIP-seq | 623  | 74062123 | 74062456 |
| DNaseI HS |            |           |          |        | ENCODE          | 581  | 74062340 | 74062610 |
|           | rs10793102 | Imputed   | 0.206    |        |                 |      | 74062485 |          |
| DNaseI HS |            |           |          |        | ENCODE          | 317  | 74062660 | 74062910 |
|           |            |           |          | BAF155 | ENCODE ChIP-seq | 688  | 74062695 | 74062888 |
|           | rs11822234 | Imputed   | 2.04E-05 |        |                 |      | 74062794 |          |
|           | rs11602237 | Imputed   | 1.95E-05 |        |                 |      | 74063339 |          |
|           |            |           |          | PU.1   | ENCODE ChIP-seq | 154  | 74063350 | 74063581 |
|           | rs7104259  | Genotyped | 0.015    |        |                 |      | 74064089 |          |
|           | rs7104675  | Imputed   | 9.61E-03 |        |                 |      | 74064380 |          |
|           | rs7104802  | Genotyped | 3.66E-03 |        |                 |      | 74064448 |          |
| DNaseI HS |            |           |          |        | ENCODE          | 471  | 74064580 | 74064730 |
|           | rs7127935  | Imputed   | 6.92E-03 |        |                 |      | 74064655 |          |
| DNaseI HS |            |           |          |        | ENCODE          | 387  | 74065840 | 74066170 |
|           |            |           |          | ARP-1  | TransFac        | 1.97 | 74066489 | 74066505 |
| DNaseI HS |            |           |          |        | ENCODE          | 95   | 74067040 | 74067190 |
|           |            |           |          | Ini1   | ENCODE ChIP-seq | 244  | 74067226 | 74067389 |
|           | rs7940591  | Imputed   | 5.78E-03 |        |                 |      | 74067530 |          |
|           |            |           |          | c-Jun  | ENCODE ChIP-seq | 264  | 74067531 | 74067852 |
| DNaseI HS |            |           |          |        | ENCODE          | 267  | 74067620 | 74067850 |
|           | rs11236208 | Imputed   | 0.020    |        |                 |      | 74067969 |          |
| DNaseI HS |            |           |          |        | ENCODE          | 175  | 74068840 | 74069050 |
|           |            |           |          | Ini1   | ENCODE ChIP-seq | 203  | 74068891 | 74069051 |
|           |            |           |          | Arnt   | TransFac        | 1.85 | 74069611 | 74069631 |
| DNaseI HS |            |           |          |        | ENCODE          | 53   | 74069880 | 74070030 |
|           |            |           |          | p53    | TransFac        | 1.67 | 74070525 | 74070535 |
| DNaseI HS |            |           |          |        | ENCODE          | 127  | 74070560 | 74070710 |
|           |            |           |          | c-Myc  | TransFac        | 1.86 | 74070594 | 74070614 |
|           |            |           |          | RSRFC4 | TransFac        | 3.51 | 74070621 | 74070637 |
|           |            |           |          | POU3F2 | TransFac        | 2.06 | 74070652 | 74070662 |
| DNaseI HS |            |           |          |        | ENCODE          | 95   | 74071080 | 74071330 |
|           | rs12282262 | Genotyped | 0.013    |        |                 |      | 74071586 |          |
|           | rs10793104 | Genotyped | 0.530    |        |                 |      | 74071663 |          |

## Xp22.2 (rs5934683)

| Gene region   | rsID      | SNP type  | P-value  | TF type | Source          | Score | Chrom start | Chrom end |
|---------------|-----------|-----------|----------|---------|-----------------|-------|-------------|-----------|
|               | rs2521579 | Genotyped | 0.991    |         |                 |       | 9493090     |           |
|               |           |           |          | FAC1    | TransFac        | 1.83  | 9493996     | 9494010   |
| TBL1X Exon 18 |           |           |          | HSF1    | TransFac        | 2.36  | 9494556     | 9494566   |
|               |           |           |          | E4BP4   | TransFac        | 2.29  | 9494941     | 9494953   |
|               |           |           |          | ATF-2   | TransFac        | 2.31  | 9494943     | 9494951   |
|               |           |           |          | Nkx3-1  | TransFac        | 2.03  | 9494989     | 9495001   |
|               |           |           |          | Ini1    | ENCODE ChIP-seq | 274   | 9495217     | 9495357   |
|               |           |           |          | POU2F1  | TransFac        | 1.89  | 9496114     | 9496126   |
|               |           |           |          | ZID     | TransFac        | 3.28  | 9497097     | 9497110   |
|               |           |           |          | FAC1    | TransFac        | 2.21  | 9497431     | 9497445   |
|               | rs5979160 | Imputed   | 0.012    |         |                 |       | 9499933     |           |
|               |           |           |          | FOSL2   | ENCODE ChIP-seq | 211   | 9500429     | 9501193   |
|               | rs734253  | Genotyped | 3.83E-03 |         |                 |       | 9501246     |           |
| DNaseI HS     |           |           |          |         | ENCODE          | 307   | 9502576     | 9502806   |

|                 |           |           |       |          |                 |      |  |         |         |
|-----------------|-----------|-----------|-------|----------|-----------------|------|--|---------|---------|
|                 | rs1476510 | Genotyped | 0.010 |          |                 |      |  | 9503079 |         |
| GPR143 Exon 9   |           |           |       |          |                 |      |  | 9503190 | 9503616 |
|                 | rs3044    | Genotyped | 0.013 |          |                 |      |  | 9503388 |         |
| GPR143 Intron 8 |           |           |       |          |                 |      |  | 9503617 | 9517260 |
|                 |           |           |       | FOSL2    | ENCODE ChIP-seq | 170  |  | 9503876 | 9504268 |
|                 | rs6640489 | Imputed   | 0.013 |          |                 |      |  | 9504607 |         |
|                 |           |           |       | FOSL2    | ENCODE ChIP-seq | 920  |  | 9504930 | 9506097 |
|                 |           |           |       | PU.1     | ENCODE ChIP-seq | 1000 |  | 9505984 | 9506393 |
|                 | rs5978337 | Imputed   | 0.013 |          |                 |      |  | 9506038 |         |
|                 | rs5979162 | Imputed   | 0.013 |          |                 |      |  | 9506243 |         |
|                 |           |           |       | USF-1    | ENCODE ChIP-seq | 236  |  | 9507026 | 9507200 |
| DNaseI HS       |           |           |       |          | ENCODE          | 112  |  | 9507096 | 9507306 |
| DNaseI HS       |           |           |       |          | ENCODE          | 152  |  | 9507336 | 9507586 |
| DNaseI HS       |           |           |       |          | ENCODE          | 206  |  | 9507816 | 9507966 |
| DNaseI HS       |           |           |       |          | ENCODE          | 125  |  | 9508116 | 9508306 |
|                 |           |           |       | EBF      | ENCODE ChIP-seq | 54   |  | 9508520 | 9508867 |
|                 |           |           |       | PAX5-N19 | ENCODE ChIP-seq | 106  |  | 9508543 | 9508819 |
|                 |           |           |       | BCL11A   | ENCODE ChIP-seq | 181  |  | 9508550 | 9508870 |
|                 |           |           |       | BATF     | ENCODE ChIP-seq | 425  |  | 9508591 | 9508878 |
|                 |           |           |       | NFKB     | ENCODE ChIP-seq | 339  |  | 9508610 | 9508782 |
| DNaseI HS       |           |           |       |          | ENCODE          | 546  |  | 9508616 | 9508850 |
|                 | rs6530311 | Genotyped | 0.015 |          |                 |      |  | 9509233 |         |
|                 |           |           |       | POU2F1   | TransFac        | 3.29 |  | 9514099 | 9514111 |
|                 |           |           |       | Oct-B1   | TransFac        | 2.44 |  | 9514100 | 9514113 |
| DNaseI HS       |           |           |       |          | ENCODE          | 137  |  | 9515216 | 9515426 |
| DNaseI HS       |           |           |       |          | ENCODE          | 106  |  | 9515956 | 9516186 |
|                 | rs6654731 | Genotyped | 0.717 |          |                 |      |  | 9516373 |         |
|                 |           |           |       | PU.1     | ENCODE ChIP-seq | 1000 |  | 9516943 | 9517222 |
|                 |           |           |       | Pbx3     | ENCODE ChIP-seq | 491  |  | 9516959 | 9517187 |
|                 |           |           |       | BCL11A   | ENCODE ChIP-seq | 338  |  | 9516972 | 9517208 |
| GPR143 Exon 8   |           |           |       |          |                 |      |  | 9517261 | 9517495 |
|                 |           |           |       | AP-2rep  | TransFac        | 2.23 |  | 9517392 | 9517399 |
|                 |           |           |       | SRF      | TransFac        | 3.07 |  | 9517444 | 9517459 |
| GPR143 Intron 7 |           |           |       |          |                 |      |  | 9517496 | 9519113 |
| GPR143 Exon 7   |           |           |       |          |                 |      |  | 9519114 | 9519231 |
|                 |           |           |       | c-Myc    | TransFac        | 2.29 |  | 9519119 | 9519133 |
|                 |           |           |       | AML1a    | TransFac        | 1.68 |  | 9519125 | 9519131 |
|                 |           |           |       | CUTL1    | TransFac        | 1.92 |  | 9519206 | 9519221 |
| GPR143 Intron 6 |           |           |       |          |                 |      |  | 9519232 | 9521340 |
| GPR143 Exon 6   |           |           |       |          |                 |      |  | 9521341 | 9521449 |
| GPR143 Intron 5 |           |           |       |          |                 |      |  | 9521450 | 9523819 |
|                 |           |           |       | Cart-1   | TransFac        | 2.06 |  | 9523181 | 9523199 |
|                 |           |           |       | c-Jun    | ENCODE ChIP-seq | 444  |  | 9523207 | 9523574 |
|                 |           |           |       | PU.1     | ENCODE ChIP-seq | 219  |  | 9523238 | 9523542 |
| DNaseI HS       |           |           |       |          | ENCODE          | 649  |  | 9523296 | 9523546 |
|                 |           |           |       | GABP     | ENCODE ChIP-seq | 45   |  | 9523301 | 9523445 |
| DNaseI HS       |           |           |       |          | ENCODE          | 179  |  | 9523596 | 9523746 |
|                 |           |           |       | GR       | ENCODE ChIP-seq | 48   |  | 9523613 | 9523926 |
|                 |           |           |       | c-Jun    | ENCODE ChIP-seq | 328  |  | 9523819 | 9524657 |
| GPR143 Exon 5   |           |           |       |          |                 |      |  | 9523820 | 9523929 |
|                 |           |           |       | CREB     | TransFac        | 2.13 |  | 9523886 | 9523898 |
|                 |           |           |       | GATA-2   | TransFac        | 1.79 |  | 9523898 | 9523908 |
|                 |           |           |       | XBP-1    | TransFac        | 1.95 |  | 9523899 | 9523916 |
|                 |           |           |       | PU.1     | ENCODE ChIP-seq | 315  |  | 9523912 | 9524106 |

|                 |                  |                  |                 |         |                 |         |                |         |
|-----------------|------------------|------------------|-----------------|---------|-----------------|---------|----------------|---------|
| GPR143 Intron 4 |                  |                  |                 | 9523930 | 9526349         |         |                |         |
| DNaseI HS       |                  |                  |                 | ENCODE  | 576             | 9523936 | 9524286        |         |
|                 |                  |                  |                 | TBP     | TransFac        | 2.45    | 9524181        | 9524191 |
| DNaseI HS       |                  |                  |                 |         | ENCODE          | 255     | 9524356        | 9524626 |
| GPR143 Exon 4   |                  |                  |                 | 9526350 | 9526442         |         |                |         |
| GPR143 Intron 3 |                  |                  |                 | 9526443 | 9537107         |         |                |         |
| DNaseI HS       |                  |                  |                 | ENCODE  | 131             | 9527040 | 9527310        |         |
|                 |                  |                  |                 | PU.1    | ENCODE ChIP-seq | 103     | 9527835        | 9528075 |
|                 | rs6640499        | Genotyped        | 0.588           |         |                 |         | 9530781        |         |
|                 | rs6638961        | Imputed          | 0.603           |         |                 |         | 9531752        |         |
| DNaseI HS       |                  |                  |                 |         | ENCODE          | 78      | 9532016        | 9532206 |
|                 |                  |                  |                 | EBF     | ENCODE ChIP-seq | 132     | 9533232        | 9533473 |
| DNaseI HS       |                  |                  |                 |         | ENCODE          | 149     | 9533260        | 9533446 |
|                 |                  |                  |                 | NFKB    | ENCODE ChIP-seq | 152     | 9533290        | 9533506 |
|                 | rs11796366       | Genotyped        | 0.012           |         |                 |         | 9533879        |         |
| DNaseI HS       |                  |                  |                 |         | ENCODE          | 664     | 9535216        | 9535426 |
| GPR143 Exon 3   |                  |                  |                 | 9537108 | 9537202         |         |                |         |
|                 |                  |                  |                 | USF-1   | ENCODE ChIP-seq | 78      | 9537125        | 9537510 |
|                 |                  |                  |                 | RP58    | TransFac        | 2.05    | 9537183        | 9537195 |
| GPR143 Intron 2 |                  |                  |                 | 9537203 | 9538492         |         |                |         |
|                 | rs2732872        | Genotyped        | 0.511           |         |                 |         | 9538257        |         |
| GPR143 Exon 2   |                  |                  |                 | 9538493 | 9538602         |         |                |         |
| GPR143 Intron 1 |                  |                  |                 | 9538603 | 9543343         |         |                |         |
|                 |                  |                  |                 | EBF     | ENCODE ChIP-seq | 148     | 9542734        | 9542962 |
|                 |                  |                  |                 | TAF1    | ENCODE ChIP-seq | 490     | 9542793        | 9543804 |
| DNaseI HS       |                  |                  |                 |         | ENCODE          | 207     | 9542836        | 9543326 |
| GPR143 Exon 1   |                  |                  |                 | 9543344 | 9543653         |         |                |         |
|                 |                  |                  |                 | AP-4    | TransFac        | 2.19    | 9543531        | 9543541 |
| DNaseI HS       |                  |                  |                 |         | ENCODE          | 367     | 9543636        | 9543846 |
|                 |                  |                  |                 | Arnt    | TransFac        | 1.71    | 9543643        | 9543663 |
|                 |                  |                  |                 | c-Myc   | TransFac        | 2.09    | 9543762        | 9543776 |
| DNaseI HS       |                  |                  |                 |         | ENCODE          | 286     | 9545180        | 9545486 |
|                 |                  |                  |                 | HNF4A   | ENCODE ChIP-seq | 578     | 9545222        | 9545451 |
| DNaseI HS       |                  |                  |                 |         | ENCODE          | 56      | 9546096        | 9546270 |
|                 |                  |                  |                 | EBF     | ENCODE ChIP-seq | 79      | 9546112        | 9546331 |
| DNaseI HS       |                  |                  |                 |         | ENCODE          | 550     | 9548156        | 9548506 |
|                 |                  |                  |                 | c-Jun   | ENCODE ChIP-seq | 374     | 9548204        | 9548563 |
|                 | rs2521651        | Imputed          | 0.141           |         |                 |         | 9550636        |         |
|                 | rs2521655        | Genotyped        | 0.143           |         |                 |         | 9551779        |         |
| DNaseI HS       |                  |                  |                 |         | ENCODE          | 740     | 9553736        | 9554070 |
|                 |                  |                  |                 | CEBPB   | ENCODE ChIP-seq | 463     | 9558164        | 9558367 |
| DNaseI HS       |                  |                  |                 |         | ENCODE          | 61      | 9559596        | 9559826 |
|                 | rs2521661        | Genotyped        | 0.499           |         |                 |         | 9559988        |         |
|                 | <b>rs5934683</b> | <b>Genotyped</b> | <b>5.11E-04</b> |         |                 |         | <b>9561210</b> |         |
|                 |                  |                  |                 | c-Fos   | ENCODE ChIP-seq | 398     | 9562194        | 9562419 |
| DNaseI HS       |                  |                  |                 |         | ENCODE          | 72      | 9563096        | 9563530 |
|                 |                  |                  |                 | AREB6   | TransFac        | 1.82    | 9563681        | 9563693 |
| DNaseI HS       |                  |                  |                 |         | ENCODE          | 95      | 9563736        | 9563946 |
|                 |                  |                  |                 | HEY1    | ENCODE ChIP-seq | 209     | 9563946        | 9564280 |
| DNaseI HS       |                  |                  |                 |         | ENCODE          | 170     | 9563960        | 9564466 |
| SHROOM2 Exon 1  |                  |                  |                 | 9564232 | 9564486         |         |                |         |
|                 |                  |                  |                 | Egr-1   | TransFac        | 2.03    | 9564282        | 9564294 |
|                 |                  |                  |                 | Egr-2   | TransFac        | 2.17    | 9564282        | 9564294 |
|                 |                  |                  |                 | Egr-3   | TransFac        | 2.2     | 9564282        | 9564294 |

|                     |           |           |          |        |                 |      |         |         |
|---------------------|-----------|-----------|----------|--------|-----------------|------|---------|---------|
|                     |           |           |          | Pax-5  | TransFac        | 2.29 | 9564415 | 9564443 |
| SHROOM2 Intron<br>1 |           |           |          |        |                 |      | 9564487 | 9651427 |
| DNaseI HS           |           |           |          |        | ENCODE          | 95   | 9564600 | 9564846 |
|                     |           |           |          | AP-1   | TransFac        | 1.78 | 9564607 | 9564618 |
|                     |           |           |          | Arnt   | TransFac        | 1.68 | 9564607 | 9564627 |
|                     |           |           |          | MZF-1  | TransFac        | 2.98 | 9564710 | 9564723 |
|                     |           |           |          | AREB6  | TransFac        | 1.82 | 9564785 | 9564797 |
|                     |           |           |          | Lmo2   | TransFac        | 1.7  | 9564785 | 9564797 |
| DNaseI HS           |           |           |          |        | ENCODE          | 136  | 9564936 | 9565306 |
|                     | rs2521662 | Imputed   | 0.347    |        |                 |      | 9566359 |         |
|                     |           |           |          | p300   | ENCODE ChIP-seq | 123  | 9566723 | 9566997 |
|                     |           |           |          | CEBPB  | ENCODE ChIP-seq | 413  | 9566740 | 9567025 |
| DNaseI HS           |           |           |          |        | ENCODE          | 718  | 9566776 | 9566990 |
|                     |           |           |          | POU2F1 | TransFac        | 1.65 | 9566881 | 9566904 |
|                     |           |           |          | FOXC1  | TransFac        | 3.27 | 9566883 | 9566899 |
|                     | rs757018  | Genotyped | 0.355    |        |                 |      | 9567034 |         |
| DNaseI HS           |           |           |          |        | ENCODE          | 1000 | 9567416 | 9567586 |
|                     |           |           |          | AP-4   | TransFac        | 1.78 | 9567467 | 9567477 |
|                     |           |           |          | c-Myb  | TransFac        | 3.21 | 9568555 | 9568565 |
|                     | rs2040621 | Imputed   | 0.345    |        |                 |      | 9568681 |         |
| DNaseI HS           |           |           |          |        | ENCODE          | 1000 | 9568716 | 9568946 |
|                     |           |           |          | POU2F1 | TransFac        | 2.33 | 9569008 | 9569021 |
|                     |           |           |          | Oct-B1 | TransFac        | 2.53 | 9569150 | 9569163 |
| DNaseI HS           |           |           |          |        | ENCODE          | 240  | 9569316 | 9569486 |
|                     |           |           |          | AP-4   | TransFac        | 1.76 | 9573639 | 9573649 |
|                     |           |           |          | Nkx3-1 | TransFac        | 2.34 | 9575362 | 9575374 |
| DNaseI HS           |           |           |          |        | ENCODE          | 171  | 9575856 | 9576006 |
|                     |           |           |          | CEBPB  | ENCODE ChIP-seq | 496  | 9575891 | 9576124 |
|                     | rs6530318 | Genotyped | 0.020    |        |                 |      | 9575936 |         |
|                     |           |           |          | CUTL1  | TransFac        | 1.64 | 9576134 | 9576149 |
| DNaseI HS           |           |           |          |        | ENCODE          | 107  | 9576756 | 9576906 |
|                     |           |           |          | c-Myb  | TransFac        | 1.72 | 9577823 | 9577833 |
|                     |           |           |          | NRSF   | ENCODE ChIP-seq | 29   | 9579754 | 9579922 |
|                     | rs7059068 | Genotyped | 9.92E-03 |        |                 |      | 9581936 |         |
| DNaseI HS           |           |           |          |        | ENCODE          | 83   | 9582076 | 9582246 |
|                     |           |           |          | Pax-2  | TransFac        | 1.7  | 9583461 | 9583480 |
| DNaseI HS           |           |           |          |        | ENCODE          | 298  | 9583796 | 9584026 |
| DNaseI HS           |           |           |          |        | ENCODE          | 112  | 9584796 | 9584946 |
|                     |           |           |          | PU.1   | ENCODE ChIP-seq | 236  | 9585578 | 9585791 |
| DNaseI HS           |           |           |          |        | ENCODE          | 333  | 9585736 | 9585906 |
| DNaseI HS           |           |           |          |        | ENCODE          | 264  | 9587756 | 9587946 |
| DNaseI HS           |           |           |          |        | ENCODE          | 142  | 9588056 | 9588286 |
| DNaseI HS           |           |           |          |        | ENCODE          | 301  | 9594216 | 9594446 |
|                     |           |           |          | AREB6  | TransFac        | 1.64 | 9595165 | 9595174 |
|                     |           |           |          | Hlf    | TransFac        | 3.1  | 9595642 | 9595652 |
|                     |           |           |          | RP58   | TransFac        | 1.74 | 9595754 | 9595766 |
|                     |           |           |          | FOXL1  | TransFac        | 1.96 | 9595791 | 9595807 |
|                     |           |           |          | RSRFC4 | TransFac        | 2.35 | 9595791 | 9595807 |
|                     |           |           |          | TBP    | TransFac        | 1.97 | 9595795 | 9595803 |
|                     |           |           |          | ISGF-3 | TransFac        | 1.72 | 9596058 | 9596073 |
|                     |           |           |          | HSF1   | TransFac        | 1.93 | 9596134 | 9596144 |
|                     |           |           |          | CUTL1  | TransFac        | 2.38 | 9596180 | 9596195 |
|                     |           |           |          | AP-4   | TransFac        | 1.76 | 9596235 | 9596245 |
|                     |           |           |          | Pbx1a  | TransFac        | 2.37 | 9596519 | 9596534 |

|           |           |           |       |          |                 |      |         |         |
|-----------|-----------|-----------|-------|----------|-----------------|------|---------|---------|
|           |           |           |       | CUTL1    | TransFac        | 1.64 | 9596520 | 9596535 |
|           |           |           |       | Elk-1    | TransFac        | 1.66 | 9596564 | 9596580 |
|           |           |           |       | POU2F1   | TransFac        | 1.91 | 9596618 | 9596641 |
|           |           |           |       | ARP-1    | TransFac        | 2.05 | 9596654 | 9596670 |
|           |           |           |       | Pax-2    | TransFac        | 1.72 | 9596881 | 9596900 |
|           |           |           |       | p53      | TransFac        | 1.95 | 9596888 | 9596898 |
|           |           |           |       | AREB6    | TransFac        | 2.2  | 9596959 | 9596968 |
|           |           |           |       | CUTL1    | TransFac        | 1.7  | 9597043 | 9597053 |
|           |           |           |       | CREB     | TransFac        | 2.42 | 9597223 | 9597238 |
|           |           |           |       | FOXL1    | TransFac        | 2.19 | 9597328 | 9597344 |
|           |           |           |       | ATF-2    | TransFac        | 1.76 | 9597329 | 9597337 |
|           |           |           |       | FOXO4    | TransFac        | 2.13 | 9597330 | 9597344 |
|           |           |           |       | MRF-2    | TransFac        | 1.93 | 9597417 | 9597431 |
| DNaseI HS |           |           |       |          | ENCODE          | 118  | 9599036 | 9599186 |
| DNaseI HS |           |           |       |          | ENCODE          | 532  | 9602336 | 9602610 |
|           |           |           |       | MRF-2    | TransFac        | 2.56 | 9602458 | 9602472 |
| DNaseI HS |           |           |       |          | ENCODE          | 171  | 9602916 | 9603186 |
|           |           |           |       | FOXO4    | TransFac        | 1.8  | 9603308 | 9603322 |
| DNaseI HS |           |           |       |          | ENCODE          | 371  | 9603336 | 9603546 |
|           |           |           |       | RelA     | TransFac        | 1.81 | 9603407 | 9603417 |
|           |           |           |       | HNF4A    | ENCODE ChIP-seq | 233  | 9603448 | 9604073 |
|           |           |           |       | p300     | ENCODE ChIP-seq | 114  | 9603882 | 9604083 |
|           |           |           |       | Ini1     | ENCODE ChIP-seq | 230  | 9606971 | 9607151 |
|           |           |           |       | TCF12    | ENCODE ChIP-seq | 122  | 9607009 | 9607324 |
| DNaseI HS |           |           |       |          | ENCODE          | 177  | 9607120 | 9607270 |
|           |           |           |       | IRF4     | ENCODE ChIP-seq | 940  | 9607193 | 9607690 |
|           |           |           |       | NFKB     | ENCODE ChIP-seq | 172  | 9607253 | 9607719 |
|           |           |           |       | BCL11A   | ENCODE ChIP-seq | 1000 | 9607272 | 9607706 |
|           |           |           |       | p300     | ENCODE ChIP-seq | 234  | 9607275 | 9607687 |
|           |           |           |       | PAX5-N19 | ENCODE ChIP-seq | 603  | 9607291 | 9607678 |
|           |           |           |       | JunD     | ENCODE ChIP-seq | 672  | 9607308 | 9607728 |
|           |           |           |       | BATF     | ENCODE ChIP-seq | 1000 | 9607310 | 9607704 |
|           |           |           |       | EBF      | ENCODE ChIP-seq | 70   | 9607320 | 9607599 |
|           |           |           |       | TAF1     | ENCODE ChIP-seq | 90   | 9607336 | 9607669 |
|           |           |           |       | TCF12    | ENCODE ChIP-seq | 778  | 9607336 | 9607682 |
|           |           |           |       | c-Jun    | ENCODE ChIP-seq | 357  | 9607338 | 9607742 |
| DNaseI HS |           |           |       |          | ENCODE          | 1000 | 9607351 | 9607626 |
|           |           |           |       | PAX5-C20 | ENCODE ChIP-seq | 324  | 9607381 | 9607661 |
|           |           |           |       | BAF155   | ENCODE ChIP-seq | 1000 | 9607385 | 9607622 |
|           |           |           |       | POU2F2   | ENCODE ChIP-seq | 235  | 9607387 | 9607640 |
|           | rs5934697 | Imputed   | 0.427 |          |                 |      | 9608931 |         |
|           |           |           |       | Max      | ENCODE ChIP-seq | 1000 | 9610157 | 9610486 |
| DNaseI HS |           |           |       |          | ENCODE          | 41   | 9610316 | 9610426 |
| DNaseI HS |           |           |       |          | ENCODE          | 982  | 9610460 | 9610906 |
|           | rs5933761 | Imputed   | 0.456 |          |                 |      | 9613230 |         |
|           | rs2405940 | Genotyped | 0.391 |          |                 |      | 9613280 |         |
|           |           |           |       | p53      | TransFac        | 1.79 | 9613419 | 9613439 |
|           | rs1859013 | Imputed   | 0.463 |          |                 |      | 9613481 |         |
|           | rs6530329 | Imputed   | 0.491 |          |                 |      | 9614078 |         |
|           | rs6638967 | Imputed   | 0.627 |          |                 |      | 9615667 |         |
| DNaseI HS |           |           |       |          | ENCODE          | 331  | 9616136 | 9616306 |
|           | rs4830660 | Imputed   | 0.646 |          |                 |      | 9617325 |         |
|           | rs4830661 | Genotyped | 0.285 |          |                 |      | 9617429 |         |
|           | rs6530331 | Imputed   | 0.788 |          |                 |      | 9617838 |         |

|           |            |           |       |        |                 |      |         |         |
|-----------|------------|-----------|-------|--------|-----------------|------|---------|---------|
|           | rs5933762  | Genotyped | 0.668 |        |                 |      | 9618602 |         |
|           |            |           |       | FOXO1  | TransFac        | 1.87 | 9620267 | 9620283 |
|           |            |           |       | NFKB   | ENCODE ChIP-seq | 63   | 9620303 | 9620527 |
| DNaseI HS |            |           |       |        | ENCODE          | 562  | 9620336 | 9620686 |
|           | rs6530332  | Imputed   | 0.710 |        |                 |      | 9620377 |         |
|           |            |           |       | MZF-1  | TransFac        | 1.66 | 9620411 | 9620424 |
|           | rs960417   | Genotyped | 0.604 |        |                 |      | 9620831 |         |
| DNaseI HS |            |           |       |        | ENCODE          | 112  | 9622756 | 9622906 |
|           |            |           |       | HEY1   | ENCODE ChIP-seq | 47   | 9622907 | 9623250 |
| DNaseI HS |            |           |       |        | ENCODE          | 107  | 9622976 | 9623270 |
|           |            |           |       | CEBPB  | ENCODE ChIP-seq | 595  | 9623275 | 9623740 |
|           |            |           |       | p300   | ENCODE ChIP-seq | 221  | 9623298 | 9623670 |
| DNaseI HS |            |           |       |        | ENCODE          | 628  | 9623336 | 9623666 |
|           | rs2405942  | Genotyped | 0.825 |        |                 |      | 9623871 |         |
| DNaseI HS |            |           |       |        | ENCODE          | 264  | 9624416 | 9624706 |
|           | rs6530333  | Genotyped | 0.637 |        |                 |      | 9624668 |         |
|           |            |           |       | BAF155 | ENCODE ChIP-seq | 539  | 9624923 | 9625160 |
|           |            |           |       | c-Jun  | ENCODE ChIP-seq | 321  | 9624941 | 9625255 |
|           |            |           |       | CEBPB  | ENCODE ChIP-seq | 355  | 9624963 | 9625294 |
|           |            |           |       | FOSL2  | ENCODE ChIP-seq | 100  | 9624969 | 9625203 |
|           |            |           |       | JunD   | ENCODE ChIP-seq | 143  | 9624971 | 9625303 |
| DNaseI HS |            |           |       |        | ENCODE          | 1000 | 9624976 | 9625226 |
|           | rs5933763  | Imputed   | 0.580 |        |                 |      | 9625101 |         |
|           | rs5933764  | Imputed   | 0.565 |        |                 |      | 9625257 |         |
|           | rs5933765  | Genotyped | 0.538 |        |                 |      | 9625538 |         |
| DNaseI HS |            |           |       |        | ENCODE          | 141  | 9626956 | 9627166 |
|           | rs5934702  | Genotyped | 0.365 |        |                 |      | 9627249 |         |
|           | rs5934703  | Imputed   | 0.359 |        |                 |      | 9627315 |         |
|           | rs16985744 | Imputed   | 0.696 |        |                 |      | 9627419 |         |
|           | rs4830418  | Imputed   | 0.357 |        |                 |      | 9627483 |         |
|           | rs4830419  | Imputed   | 0.353 |        |                 |      | 9627715 |         |
| DNaseI HS |            |           |       |        | ENCODE          | 1000 | 9629736 | 9629966 |
|           | rs5934705  | Genotyped | 0.294 |        |                 |      | 9631135 |         |
| DNaseI HS |            |           |       |        | ENCODE          | 186  | 9631136 | 9631346 |
|           | rs12395804 | Genotyped | 0.634 |        |                 |      | 9632657 |         |
| DNaseI HS |            |           |       |        | ENCODE          | 212  | 9633356 | 9633726 |
| DNaseI HS |            |           |       |        | ENCODE          | 269  | 9633816 | 9634026 |
|           |            |           |       | Max    | ENCODE ChIP-seq | 713  | 9634448 | 9634827 |
| DNaseI HS |            |           |       |        | ENCODE          | 113  | 9634456 | 9634606 |
|           | rs7051365  | Genotyped | 0.096 |        |                 |      | 9634583 |         |
| DNaseI HS |            |           |       |        | ENCODE          | 44   | 9635456 | 9635606 |
| DNaseI HS |            |           |       |        | ENCODE          | 394  | 9635856 | 9636166 |
|           |            |           |       | GR     | ENCODE ChIP-seq | 181  | 9635934 | 9636308 |
|           |            |           |       | MZF-1  | TransFac        | 2.27 | 9635995 | 9636008 |
|           |            |           |       | c-Rel  | TransFac        | 1.82 | 9636084 | 9636094 |
|           |            |           |       | FOXO1  | TransFac        | 1.83 | 9636096 | 9636109 |
|           |            |           |       | ISGF-3 | TransFac        | 1.67 | 9636150 | 9636165 |
|           | rs7062290  | Genotyped | 0.094 |        |                 |      | 9637173 |         |
|           | rs5979192  | Imputed   | 0.107 |        |                 |      | 9637705 |         |
| DNaseI HS |            |           |       |        | ENCODE          | 334  | 9637716 | 9637906 |
|           |            |           |       | Bach1  | TransFac        | 2.5  | 9637766 | 9637781 |
| DNaseI HS |            |           |       |        | ENCODE          | 597  | 9637996 | 9638206 |
| DNaseI HS |            |           |       |        | ENCODE          | 165  | 9638676 | 9638946 |
|           |            |           |       | CTCF   | ENCODE ChIP-seq | 88   | 9640324 | 9640554 |



|                  |            |           |       |        |                 |      |         |         |
|------------------|------------|-----------|-------|--------|-----------------|------|---------|---------|
|                  |            |           |       | CEBPB  | ENCODE ChIP-seq | 948  | 9640446 | 9640612 |
|                  | rs1016625  | Genotyped | 0.047 |        |                 |      | 9640837 |         |
|                  | rs1016626  | Imputed   | 0.428 |        |                 |      | 9641162 |         |
|                  | rs1016627  | Genotyped | 0.078 |        |                 |      | 9641307 |         |
| DNaseI HS        |            |           |       |        | ENCODE          | 296  | 9641756 | 9642106 |
|                  |            |           |       | XBP-1  | TransFac        | 1.67 | 9643244 | 9643261 |
|                  |            |           |       | Ini1   | ENCODE ChIP-seq | 235  | 9643639 | 9643851 |
| DNaseI HS        |            |           |       |        | ENCODE          | 108  | 9643640 | 9643790 |
|                  |            |           |       | NFKB   | ENCODE ChIP-seq | 993  | 9643732 | 9644277 |
|                  |            |           |       | GR     | ENCODE ChIP-seq | 424  | 9643749 | 9644173 |
|                  |            |           |       | BAF155 | ENCODE ChIP-seq | 663  | 9643809 | 9644371 |
|                  |            |           |       | c-Jun  | ENCODE ChIP-seq | 354  | 9643858 | 9644367 |
|                  |            |           |       | JunD   | ENCODE ChIP-seq | 466  | 9643868 | 9644599 |
|                  |            |           |       | BAF170 | ENCODE ChIP-seq | 653  | 9643905 | 9644706 |
| DNaseI HS        |            |           |       |        | ENCODE          | 435  | 9643916 | 9644186 |
|                  |            |           |       | AP-1   | TransFac        | 1.72 | 9644019 | 9644028 |
|                  | rs5934708  | Genotyped | 0.115 |        |                 |      | 9644055 |         |
|                  |            |           |       | E47    | TransFac        | 1.76 | 9644156 | 9644172 |
|                  |            |           |       | AP-1   | TransFac        | 1.79 | 9644166 | 9644175 |
| DNaseI HS        |            |           |       |        | ENCODE          | 366  | 9644356 | 9644786 |
|                  |            |           |       | Ini1   | ENCODE ChIP-seq | 376  | 9644429 | 9644840 |
|                  |            |           |       | p300   | TransFac        | 1.82 | 9644532 | 9644546 |
|                  | rs12007032 | Imputed   | 0.353 |        |                 |      | 9644753 |         |
| DNaseI HS        |            |           |       |        | ENCODE          | 159  | 9644856 | 9645006 |
|                  | rs5979195  | Imputed   | 0.355 |        |                 |      | 9644975 |         |
|                  | rs5933773  | Imputed   | 0.399 |        |                 |      | 9645028 |         |
|                  | rs6640534  | Genotyped | 0.317 |        |                 |      | 9645430 |         |
| DNaseI HS        |            |           |       |        | ENCODE          | 471  | 9645556 | 9645886 |
|                  | rs4830665  | Imputed   | 0.195 |        |                 |      | 9645855 |         |
|                  | rs5934710  | Imputed   | 0.442 |        |                 |      | 9647321 |         |
|                  | rs723259   | Genotyped | 0.498 |        |                 |      | 9648934 |         |
| DNaseI HS        |            |           |       |        | ENCODE          | 107  | 9649136 | 9649306 |
|                  | rs723261   | Imputed   | 0.466 |        |                 |      | 9649446 |         |
|                  |            |           |       | NFKB   | ENCODE ChIP-seq | 101  | 9649584 | 9649750 |
|                  | rs5933775  | Genotyped | 0.459 |        |                 |      | 9649608 |         |
| DNaseI HS        |            |           |       |        | ENCODE          | 287  | 9649716 | 9649946 |
| DNaseI HS        |            |           |       |        | ENCODE          | 59   | 9650676 | 9650886 |
|                  | rs763375   | Imputed   | 0.484 |        |                 |      | 9651274 |         |
| SHROOM2 Exon 2   |            |           |       |        |                 |      | 9651428 | 9651579 |
|                  |            |           |       | CUTL1  | TransFac        | 1.92 | 9651487 | 9651497 |
| SHROOM2 Intron 2 |            |           |       |        |                 |      | 9651580 | 9668752 |
|                  |            |           |       | Rad21  | ENCODE ChIP-seq | 152  | 9651725 | 9652121 |
|                  |            |           |       | CTCF   | ENCODE ChIP-seq | 364  | 9651740 | 9652075 |
|                  |            |           |       | NFKB   | ENCODE ChIP-seq | 78   | 9651784 | 9652122 |
| DNaseI HS        |            |           |       |        | ENCODE          | 284  | 9651816 | 9652026 |
|                  | rs2239416  | Imputed   | 0.497 |        |                 |      | 9652249 |         |
| DNaseI HS        |            |           |       |        | ENCODE          | 516  | 9652336 | 9652586 |
| DNaseI HS        |            |           |       |        | ENCODE          | 150  | 9654096 | 9654266 |
| DNaseI HS        |            |           |       |        | ENCODE          | 333  | 9655976 | 9656206 |
|                  |            |           |       | Pbx1a  | TransFac        | 2.07 | 9656058 | 9656073 |
|                  |            |           |       | RP58   | TransFac        | 2.12 | 9656424 | 9656436 |
|                  | rs6640537  | Imputed   | 0.430 |        |                 |      | 9657453 |         |
|                  | rs17280844 | Genotyped | 0.407 |        |                 |      | 9657652 |         |
|                  |            |           |       | Elk-1  | TransFac        | 1.8  | 9658008 | 9658024 |

|                  |            |           |       |          |                 |      |         |         |
|------------------|------------|-----------|-------|----------|-----------------|------|---------|---------|
|                  | rs2051687  | Genotyped | 0.213 |          |                 |      | 9659037 |         |
|                  | rs2239427  | Imputed   | 0.472 |          |                 |      | 9659259 |         |
|                  |            |           |       | Max      | ENCODE ChIP-seq | 696  | 9660400 | 9661200 |
|                  |            |           |       | c-Jun    | ENCODE ChIP-seq | 1000 | 9660503 | 9660980 |
| DNaseI HS        |            |           |       |          | ENCODE          | 437  | 9660536 | 9660926 |
|                  | rs1858883  | Genotyped | 0.511 |          |                 |      | 9660624 |         |
|                  |            |           |       | TBP      | TransFac        | 1.92 | 9660651 | 9660661 |
| DNaseI HS        |            |           |       |          | ENCODE          | 195  | 9661896 | 9662126 |
|                  |            |           |       | IRF4     | ENCODE ChIP-seq | 496  | 9662910 | 9663280 |
|                  |            |           |       | CTCF     | ENCODE ChIP-seq | 882  | 9662948 | 9663277 |
|                  |            |           |       | Rad21    | ENCODE ChIP-seq | 249  | 9662959 | 9663389 |
|                  |            |           |       | NFKB     | ENCODE ChIP-seq | 194  | 9662995 | 9663300 |
| DNaseI HS        |            |           |       |          | ENCODE          | 514  | 9662996 | 9663226 |
|                  | rs13340753 | Genotyped | 0.505 |          |                 |      | 9663006 |         |
|                  |            |           |       | Ini1     | ENCODE ChIP-seq | 141  | 9663024 | 9663233 |
|                  | rs6640541  | Imputed   | 0.537 |          |                 |      | 9664230 |         |
|                  | rs12557532 | Genotyped | 0.819 |          |                 |      | 9664501 |         |
| DNaseI HS        |            |           |       |          | ENCODE          | 62   | 9664956 | 9665106 |
|                  | rs5979199  | Genotyped | 0.654 |          |                 |      | 9665537 |         |
|                  |            |           |       | NRSF     | ENCODE ChIP-seq | 832  | 9666720 | 9667086 |
| DNaseI HS        |            |           |       |          | ENCODE          | 310  | 9666896 | 9667086 |
|                  | rs6638974  | Imputed   | 0.575 |          |                 |      | 9666988 |         |
|                  | rs6640542  | Imputed   | 0.577 |          |                 |      | 9667110 |         |
| DNaseI HS        |            |           |       |          | ENCODE          | 101  | 9667416 | 9667606 |
| SHROOM2 Exon 3   |            |           |       |          |                 |      | 9668753 | 9668884 |
|                  |            |           |       | p300     | TransFac        | 2.6  | 9668773 | 9668787 |
| SHROOM2 Intron 3 | rs6640543  | Imputed   | 0.915 |          |                 |      | 9668834 |         |
|                  |            |           |       |          |                 |      | 9668885 | 9672133 |
|                  | rs6640544  | Genotyped | 0.929 |          |                 |      | 9668933 |         |
|                  | rs17327524 | Genotyped | 0.515 |          |                 |      | 9671845 |         |
|                  | rs17327531 | Imputed   | 0.593 |          |                 |      | 9671904 |         |
| DNaseI HS        |            |           |       |          | ENCODE          | 84   | 9671916 | 9672106 |
| SHROOM2 Exon 4   |            |           |       |          |                 |      | 9672134 | 9674474 |
|                  |            |           |       | NRSF     | TransFac        | 2.77 | 9672197 | 9672218 |
|                  |            |           |       | E47      | TransFac        | 2.17 | 9672273 | 9672289 |
|                  |            |           |       | c-Myc    | TransFac        | 1.94 | 9672274 | 9672288 |
|                  |            |           |       | ZID      | TransFac        | 1.65 | 9672313 | 9672326 |
|                  |            |           |       | AML1a    | TransFac        | 1.68 | 9672345 | 9672351 |
|                  |            |           |       | HSF1     | TransFac        | 1.87 | 9672381 | 9672391 |
|                  |            |           |       | SRF      | TransFac        | 1.76 | 9672568 | 9672582 |
|                  |            |           |       | Arnt     | TransFac        | 1.8  | 9673051 | 9673071 |
|                  |            |           |       | AREB6    | TransFac        | 2.65 | 9673055 | 9673068 |
|                  |            |           |       | SREBP-1a | TransFac        | 1.86 | 9673056 | 9673067 |
|                  |            |           |       | TBP      | TransFac        | 2.21 | 9673720 | 9673735 |
|                  |            |           |       | XBP-1    | TransFac        | 2.01 | 9673759 | 9673776 |
| SHROOM2 Intron 4 |            |           |       |          |                 |      | 9674475 | 9675965 |
| DNaseI HS        |            |           |       |          | ENCODE          | 1000 | 9675556 | 9675946 |
| SHROOM2 Exon 5   |            |           |       |          |                 |      | 9675966 | 9676066 |
| SHROOM2 Intron 5 |            |           |       |          |                 |      | 9676067 | 9709950 |
|                  | rs2073944  | Imputed   | 0.817 |          |                 |      | 9676156 |         |
| DNaseI HS        |            |           |       |          | ENCODE          | 97   | 9676476 | 9676686 |
|                  |            |           |       | Nkx6-1   | TransFac        | 2.03 | 9676544 | 9676557 |

|           |           |           |       |          |                 |      |         |         |
|-----------|-----------|-----------|-------|----------|-----------------|------|---------|---------|
|           |           |           |       | Cdc5     | TransFac        | 2.24 | 9676565 | 9676577 |
|           | rs2012821 | Genotyped | 0.360 |          |                 |      | 9676743 |         |
|           |           |           |       | IRF4     | ENCODE ChIP-seq | 763  | 9677186 | 9677753 |
|           |           |           |       | POU2F2   | ENCODE ChIP-seq | 180  | 9677274 | 9677751 |
|           |           |           |       | BCL11A   | ENCODE ChIP-seq | 902  | 9677277 | 9677666 |
|           |           |           |       | PAX5-N19 | ENCODE ChIP-seq | 130  | 9677301 | 9677708 |
|           |           |           |       | EBF      | ENCODE ChIP-seq | 158  | 9677333 | 9677881 |
|           |           |           |       | BATF     | ENCODE ChIP-seq | 309  | 9677355 | 9677620 |
|           |           |           |       | TCF12    | ENCODE ChIP-seq | 797  | 9677361 | 9677714 |
|           |           |           |       | FOXL1    | TransFac        | 2.31 | 9677369 | 9677385 |
| DNaseI HS |           |           |       |          | ENCODE          | 914  | 9677376 | 9677766 |
|           |           |           |       | E4BP4    | TransFac        | 2.03 | 9677437 | 9677449 |
|           |           |           |       | NFKB     | ENCODE ChIP-seq | 344  | 9677438 | 9677624 |
|           |           |           |       | c-Myc    | TransFac        | 2.28 | 9677563 | 9677583 |
|           |           |           |       | Arnt     | TransFac        | 2.62 | 9677563 | 9677583 |
|           |           |           |       | SREBP-1a | TransFac        | 2.19 | 9677567 | 9677578 |
|           |           |           |       | c-Myc    | TransFac        | 2.52 | 9677567 | 9677579 |
|           |           |           |       | FOXL1    | TransFac        | 1.67 | 9680386 | 9680402 |
| DNaseI HS |           |           |       |          | ENCODE          | 171  | 9680536 | 9680746 |
| DNaseI HS |           |           |       |          | ENCODE          | 94   | 9680996 | 9681246 |
|           | rs6640551 | Genotyped | 0.639 |          |                 |      | 9681893 |         |
|           | rs6640552 | Genotyped | 0.609 |          |                 |      | 9682157 |         |
| DNaseI HS |           |           |       |          | ENCODE          | 597  | 9683016 | 9683386 |
| DNaseI HS |           |           |       |          | ENCODE          | 612  | 9684776 | 9685086 |
|           |           |           |       | FOSL2    | ENCODE ChIP-seq | 117  | 9685347 | 9685592 |
|           |           |           |       | JunD     | ENCODE ChIP-seq | 244  | 9685350 | 9685626 |
|           |           |           |       | CEBPB    | ENCODE ChIP-seq | 694  | 9685351 | 9685631 |
|           |           |           |       | c-Jun    | ENCODE ChIP-seq | 271  | 9685355 | 9685660 |
| DNaseI HS |           |           |       |          | ENCODE          | 780  | 9685416 | 9685726 |
| DNaseI HS |           |           |       |          | ENCODE          | 813  | 9685756 | 9686066 |
| DNaseI HS |           |           |       |          | ENCODE          | 528  | 9689336 | 9689626 |
|           |           |           |       | c-Jun    | ENCODE ChIP-seq | 296  | 9689399 | 9689707 |
|           |           |           |       | POU3F2   | TransFac        | 2.82 | 9689532 | 9689548 |
| DNaseI HS |           |           |       |          | ENCODE          | 793  | 9690116 | 9690366 |
|           |           |           |       | RP58     | TransFac        | 2.25 | 9690235 | 9690247 |
|           |           |           |       | Sox9     | TransFac        | 1.97 | 9690561 | 9690575 |
|           |           |           |       | FOXF2    | TransFac        | 2.09 | 9690563 | 9690579 |
|           |           |           |       | FOXL1    | TransFac        | 1.68 | 9690563 | 9690579 |
|           |           |           |       | Oct-B1   | TransFac        | 2.77 | 9690596 | 9690609 |
|           |           |           |       | p53      | TransFac        | 1.82 | 9690906 | 9690916 |
| DNaseI HS |           |           |       |          | ENCODE          | 529  | 9690916 | 9691126 |
|           |           |           |       | FOXC1    | TransFac        | 1.89 | 9691403 | 9691419 |
|           |           |           |       | LCR-F1   | TransFac        | 1.74 | 9691405 | 9691427 |
|           |           |           |       | AP-1     | TransFac        | 2.34 | 9691411 | 9691424 |
|           |           |           |       | POU2F1   | TransFac        | 2.23 | 9692075 | 9692090 |
|           | rs6640557 | Genotyped | 0.826 |          |                 |      | 9692207 |         |
|           | rs2239419 | Genotyped | 0.700 |          |                 |      | 9694918 |         |
|           | rs2239420 | Imputed   | 0.677 |          |                 |      | 9695076 |         |
|           | rs2239421 | Genotyped | 0.345 |          |                 |      | 9695788 |         |
|           | rs2239422 | Genotyped | 0.398 |          |                 |      | 9695900 |         |
|           | rs2239423 | Imputed   | 0.352 |          |                 |      | 9695930 |         |
|           |           |           |       | BCL3     | ENCODE ChIP-seq | 173  | 9697480 | 9697840 |
| DNaseI HS |           |           |       |          | ENCODE          | 54   | 9697556 | 9697746 |
| DNaseI HS |           |           |       |          | ENCODE          | 165  | 9697776 | 9697926 |

|                  |           |           |       |          |                 |         |         |         |
|------------------|-----------|-----------|-------|----------|-----------------|---------|---------|---------|
| DNaseI HS        |           |           |       | ENCODE   | 189             | 9698856 | 9699026 |         |
|                  |           |           |       | CEBPB    | ENCODE ChIP-seq | 1000    | 9699190 | 9699552 |
|                  |           |           |       | HNF4A    | ENCODE ChIP-seq | 686     | 9699231 | 9699486 |
|                  | rs2283703 | Genotyped | 0.523 |          |                 |         | 9700159 |         |
| DNaseI HS        |           |           |       | ENCODE   | 86              | 9701216 | 9701426 |         |
|                  |           |           |       | AML1a    | TransFac        | 1.68    | 9701666 | 9701672 |
|                  |           |           |       | c-Myc    | TransFac        | 2.21    | 9701831 | 9701843 |
| DNaseI HS        |           |           |       | ENCODE   | 99              | 9703916 | 9704086 |         |
| DNaseI HS        |           |           |       | ENCODE   | 195             | 9705496 | 9705746 |         |
|                  |           |           |       | TAF1     | ENCODE ChIP-seq | 35      | 9705871 | 9706089 |
| DNaseI HS        |           |           |       | ENCODE   | 1000            | 9705996 | 9706226 |         |
|                  |           |           |       | Nkx6-1   | TransFac        | 2.08    | 9706894 | 9706907 |
|                  |           |           |       | FOXO4    | TransFac        | 1.87    | 9708946 | 9708957 |
| SHROOM2 Exon 6   |           |           |       |          |                 |         | 9709951 | 9710646 |
|                  |           |           |       | NRSF     | ENCODE ChIP-seq | 52      | 9710472 | 9710647 |
| SHROOM2 Intron 6 |           |           |       |          |                 |         | 9710647 | 9714909 |
| DNaseI HS        |           |           |       | ENCODE   | 171             | 9711196 | 9711346 |         |
|                  | rs2238886 | Genotyped | 0.989 |          |                 |         | 9712112 |         |
| DNaseI HS        |           |           |       | ENCODE   | 65              | 9713276 | 9713446 |         |
|                  |           |           |       | CUTL1    | TransFac        | 1.88    | 9714909 | 9714919 |
| SHROOM2 Exon 7   |           |           |       |          |                 |         | 9714910 | 9715461 |
|                  |           |           |       | MRF-2    | TransFac        | 2.09    | 9714925 | 9714939 |
|                  |           |           |       | FAC1     | TransFac        | 1.76    | 9714925 | 9714939 |
|                  |           |           |       | ZID      | TransFac        | 2.14    | 9714942 | 9714955 |
| SHROOM2 Intron 7 |           |           |       |          |                 |         | 9715462 | 9716970 |
| SHROOM2 Exon 8   |           |           |       |          |                 |         | 9716971 | 9717142 |
|                  |           |           |       | XBP-1    | TransFac        | 1.8     | 9717024 | 9717041 |
|                  |           |           |       | CREB     | TransFac        | 1.88    | 9717028 | 9717043 |
| SHROOM2 Intron 8 |           |           |       |          |                 |         | 9717143 | 9722416 |
|                  | rs4830676 | Genotyped | 0.933 |          |                 |         | 9717327 |         |
|                  | rs4830677 | Imputed   | 0.981 |          |                 |         | 9717408 |         |
|                  | rs3788949 | Genotyped | 0.901 |          |                 |         | 9718077 |         |
|                  |           |           |       | c-Jun    | ENCODE ChIP-seq | 287     | 9718122 | 9718532 |
|                  |           |           |       | Max      | ENCODE ChIP-seq | 617     | 9718167 | 9718668 |
|                  | rs3788950 | Genotyped | 0.782 |          |                 |         | 9718173 |         |
| DNaseI HS        |           |           |       | ENCODE   | 1000            | 9718196 | 9718466 |         |
|                  | rs3788951 | Imputed   | 0.620 |          |                 |         | 9718313 |         |
| DNaseI HS        |           |           |       | ENCODE   | 263             | 9718960 | 9719466 |         |
|                  |           |           |       | NRSF     | ENCODE ChIP-seq | 1000    | 9719025 | 9719285 |
|                  |           |           |       | POU2F2   | ENCODE ChIP-seq | 219     | 9719081 | 9719535 |
|                  |           |           |       | EBF      | ENCODE ChIP-seq | 124     | 9719213 | 9719527 |
|                  |           |           |       | NFKB     | ENCODE ChIP-seq | 136     | 9719215 | 9719495 |
|                  |           |           |       | BATF     | ENCODE ChIP-seq | 324     | 9719224 | 9719494 |
|                  |           |           |       | PAX5-C20 | ENCODE ChIP-seq | 1000    | 9719717 | 9720249 |
|                  |           |           |       | p300     | ENCODE ChIP-seq | 890     | 9719748 | 9720412 |
|                  |           |           |       | TCF12    | ENCODE ChIP-seq | 1000    | 9719769 | 9720334 |
|                  |           |           |       | NFKB     | ENCODE ChIP-seq | 373     | 9719775 | 9720393 |
|                  |           |           |       | IRF4     | ENCODE ChIP-seq | 985     | 9719783 | 9720382 |
|                  |           |           |       | PAX5-N19 | ENCODE ChIP-seq | 1000    | 9719786 | 9720294 |
|                  |           |           |       | EBF      | ENCODE ChIP-seq | 983     | 9719795 | 9720338 |
|                  |           |           |       | BCL11A   | ENCODE ChIP-seq | 1000    | 9719799 | 9720337 |
|                  |           |           |       | SP1      | ENCODE ChIP-seq | 450     | 9719821 | 9720356 |

|                  |           |           |       |          |                 |      |         |         |
|------------------|-----------|-----------|-------|----------|-----------------|------|---------|---------|
|                  |           |           |       | PU.1     | ENCODE ChIP-seq | 221  | 9719823 | 9720227 |
|                  |           |           |       | BCL3     | ENCODE ChIP-seq | 1000 | 9719828 | 9720318 |
|                  |           |           |       | POU2F2   | ENCODE ChIP-seq | 440  | 9719847 | 9720327 |
|                  |           |           |       | BATF     | ENCODE ChIP-seq | 1000 | 9719859 | 9720273 |
|                  |           |           |       | Max      | ENCODE ChIP-seq | 425  | 9719901 | 9720280 |
|                  | rs5934722 | Genotyped | 0.476 |          |                 |      | 9719918 |         |
| DNaseI HS        |           |           |       |          | ENCODE          | 724  | 9719920 | 9720166 |
|                  |           |           |       | Pbx3     | ENCODE ChIP-seq | 543  | 9719975 | 9720240 |
|                  |           |           |       | EBF      | ENCODE ChIP-seq | 364  | 9721122 | 9721539 |
|                  |           |           |       | IRF4     | ENCODE ChIP-seq | 299  | 9721138 | 9721546 |
|                  |           |           |       | POU2F2   | ENCODE ChIP-seq | 211  | 9721144 | 9721542 |
|                  |           |           |       | BCL11A   | ENCODE ChIP-seq | 517  | 9721173 | 9721533 |
|                  |           |           |       | PAX5-N19 | ENCODE ChIP-seq | 467  | 9721180 | 9721503 |
|                  |           |           |       | NFKB     | ENCODE ChIP-seq | 143  | 9721201 | 9721606 |
|                  |           |           |       | PAX5-C20 | ENCODE ChIP-seq | 523  | 9721212 | 9721497 |
|                  |           |           |       | TCF12    | ENCODE ChIP-seq | 701  | 9721240 | 9721552 |
|                  |           |           |       | BATF     | ENCODE ChIP-seq | 405  | 9721248 | 9721530 |
|                  |           |           |       | Pbx3     | ENCODE ChIP-seq | 112  | 9721288 | 9721445 |
| DNaseI HS        |           |           |       |          | ENCODE          | 329  | 9721296 | 9721570 |
|                  | rs4830679 | Genotyped | 0.721 |          |                 |      | 9722022 |         |
|                  | rs3815015 | Imputed   | 0.561 |          |                 |      | 9722222 |         |
|                  |           |           |       | POU2F1   | TransFac        | 1.81 | 9722274 | 9722293 |
|                  | rs3815016 | Genotyped | 0.626 |          |                 |      | 9722278 |         |
| SHROOM2 Exon 9   |           |           |       |          |                 |      | 9722417 | 9722689 |
|                  |           |           |       | E47      | TransFac        | 2.39 | 9722444 | 9722460 |
|                  |           |           |       | Lmo2     | TransFac        | 2.01 | 9722446 | 9722458 |
|                  |           |           |       | RP58     | TransFac        | 1.95 | 9722567 | 9722579 |
|                  |           |           |       | Pax-5    | TransFac        | 1.87 | 9722607 | 9722635 |
| SHROOM2 Intron 9 |           |           |       |          |                 |      | 9722690 | 9724446 |
|                  | rs2238887 | Imputed   | 0.847 |          |                 |      | 9723258 |         |
|                  | rs2238888 | Genotyped | 0.926 |          |                 |      | 9723489 |         |
|                  | rs2238889 | Imputed   | 0.878 |          |                 |      | 9724026 |         |
|                  | rs2073940 | Imputed   | 0.758 |          |                 |      | 9724075 |         |
|                  | rs2073941 | Genotyped | 0.715 |          |                 |      | 9724403 |         |
| SHROOM2 Exon 10  |           |           |       |          |                 |      | 9724447 | 9727217 |
|                  |           |           |       | Pax-5    | TransFac        | 1.71 | 9724604 | 9724632 |
|                  | rs2073942 | Imputed   | 0.937 |          |                 |      | 9724683 |         |
|                  |           |           |       | EBF      | ENCODE ChIP-seq | 52   | 9724919 | 9725203 |
|                  |           |           |       | Pbx3     | ENCODE ChIP-seq | 136  | 9724982 | 9725197 |
| DNaseI HS        |           |           |       |          | ENCODE          | 127  | 9725016 | 9725306 |
|                  |           |           |       | BCL11A   | ENCODE ChIP-seq | 447  | 9725157 | 9725532 |
|                  |           |           |       | NFKB     | ENCODE ChIP-seq | 47   | 9725161 | 9725519 |
|                  |           |           |       | LCR-F1   | TransFac        | 1.7  | 9725217 | 9725239 |
|                  |           |           |       | BATF     | ENCODE ChIP-seq | 118  | 9725221 | 9725509 |
|                  |           |           |       | TCF12    | ENCODE ChIP-seq | 288  | 9725245 | 9725470 |
|                  | rs1858884 | Genotyped | 0.553 |          |                 |      | 9725585 |         |
| DNaseI HS        |           |           |       |          | ENCODE          | 182  | 9726296 | 9726486 |
| DNaseI HS        |           |           |       |          | ENCODE          | 98   | 9727256 | 9727406 |
|                  |           |           |       | BCL3     | ENCODE ChIP-seq | 127  | 9727338 | 9727577 |
|                  | rs2188384 | Genotyped | 0.275 |          |                 |      | 9729314 |         |

**Supplementary Table 5: Relationship between SNP genotype and gene expression in colonic tissue, CRC, lymphoblastoid cell lines (LCL), fibroblasts, T-cells and adipocytes.** Box plots are shown only for selected associations.

| Variant                   | Gene/probe                     | Colonic epithelium <sup>y</sup><br>P-value            | CRC <sup>§</sup><br>P-value         | LCL<br>P-value<br>Twin1<br>Twin2<br>Geneva <sup>1,2</sup> | Fibroblast<br>P-value<br>Twin1<br>Twin2<br>Geneva <sup>1,2</sup> | Adipose<br>P-value<br>Twin1<br>Twin2 <sup>1,2</sup> | T-cell<br>P-value<br>Geneva <sup>1</sup> |
|---------------------------|--------------------------------|-------------------------------------------------------|-------------------------------------|-----------------------------------------------------------|------------------------------------------------------------------|-----------------------------------------------------|------------------------------------------|
| rs1321311<br>(6p21)       | <i>CDKN1A</i><br>ILMN_1784602  | 0.28                                                  | -                                   | 0.91<br>0.98<br>0.15                                      | 0.97<br>0.95<br>0.42                                             | 0.53<br>0.38                                        | 0.0001                                   |
| rs1321311<br>(6p21)       | <i>CDKN1A</i><br>ILMN_1787212  | -                                                     | -                                   | 4.0x10 <sup>-5</sup><br>0.008<br>0.002                    | 0.14<br>0.37<br>0.16                                             | 0.73<br>0.17                                        | 0.46                                     |
| rs1321310*<br>(6p21)      | <i>CDKN1A</i><br>A_24_P89457   | -                                                     | 0.46                                | -<br>-<br>-                                               | -<br>-<br>-                                                      | -<br>-<br>-                                         | -                                        |
| rs3824999<br>(11q13.4)    | <i>POLD3</i><br>ILMN_1751773   | 0.25                                                  | -                                   | 0.73<br>0.79<br>0.18                                      | 0.37<br>0.72<br>0.04                                             | 0.24<br>0.64                                        | 0.17                                     |
| rs3824999<br>(11q13.4)    | <i>POLD3</i><br>ILMN_2233552   | -                                                     | -                                   | 0.16<br>0.06<br>0.12                                      | 0.43<br>0.33<br>0.02                                             | 0.54<br>0.49                                        | 0.56                                     |
| rs11236187**<br>(11q13.4) | <i>POLD3</i><br>A_32_P182439   |                                                       | 0.12                                | -<br>-<br>-                                               | -<br>-<br>-                                                      | -<br>-<br>-                                         | -                                        |
| rs5934683<br>(Xp22.2)     | <i>SHROOM2</i><br>ILMN_1681777 | 1.28x10 <sup>-7</sup><br>Male-0.0003<br>Female-0.0004 |                                     | -<br>-<br>-                                               | -<br>-<br>-                                                      | -<br>-<br>-                                         | -                                        |
| rs5934683<br>(Xp22.2)     | <i>SHROOM2</i><br>A_23_P217753 | -                                                     | 0.015<br>Male-0.77<br>Female-0.0037 | -<br>-<br>-                                               | -<br>-<br>-                                                      | -<br>-<br>-                                         | -                                        |
| rs5934683<br>(Xp22.2)     | <i>GPR143</i><br>ILMN_1756261  | 0.47<br>Male-0.89<br>Female-0.24                      |                                     | -<br>-<br>-                                               | -<br>-<br>-                                                      | -<br>-<br>-                                         | -                                        |

¥Illumina analysis of 42 colon tissue samples

§Data on AgilentG4502A\_07\_3 custom gene expression platform derived from the analysis of 154 CRCs as part of the Cancer Genome Atlas project: <http://cancergenome.nih.gov>

Geneva: Fibroblast, LCL and T-cells derived from the umbilical cords of 75 Geneva GenCord individuals<sup>1</sup>

Twin1 and Twin 2: 166 adipose, 156 LCL and 160 skin samples derived from a subset of healthy female twins of the MuTHER resource<sup>2</sup>

\*Linkage disequilibrium between rs1321311 and rs1321310 –  $r^2=1.0$ ,  $D'=1.0$ .

\*\*Linkage disequilibrium between rs3824999 and rs11236187 –  $r^2=1.0$ ,  $D'=1.0$ .

## REFERENCES

1. Dimas, A.S. et al. Common regulatory variation impacts gene expression in a cell type-dependent manner. *Science* **325**, 1246-50 (2009).
2. Nica, A.C. et al. The architecture of gene regulatory variation across multiple human tissues: the MuTHER study. *PLoS Genet* **7**, e1002003 (2011).

## SUPPLEMENTARY NOTE

### 1. Subjects and datasets

Scotland1 (COGS)<sup>8</sup> included 1,012 CRC cases (51% male; mean age at diagnosis 49.6 years, SD±6.1) and 1,012 cancer-free population controls (51% male; mean age 51.0 years; SD±5.9). Cases were for early age at onset (age ≤55 years). Known dominant polyposis syndromes, HNPCC/Lynch syndrome or bi-allelic *MYH* mutation carriers were excluded. Control subjects were sampled from the Scottish population NHS registers, matched by age (±5 years), gender and area of residence within Scotland.

Scotland2 (SOCCS)<sup>8</sup> comprised 2,057 CRC cases (61% male; mean age at diagnosis 65.8 years, SD±8.4) and 2,111 population controls (60% males; mean age 67.9 years, SD±9.0) ascertained in Scotland. Cases were taken from an independent, prospective, incident CRC case series and aged <80 years at diagnosis. Control subjects were population controls matched by age (±5 years), gender and area of residence within Scotland.

UK1 (CORGI)<sup>8</sup> comprised 940 cases with colorectal neoplasia (47% male) ascertained through the Colorectal Tumour Gene Identification (CoRGI) consortium. All had at least one first-degree relative affected by CRC and one or more of the following phenotypes: CRC at age 75 or less; any colorectal adenoma (CRAd) at age 45 or less; ≥3 colorectal adenomas at age 75 or less; or a large (>1 cm diameter) or aggressive (villous and/or severely dysplastic) adenoma at age 75 or less. The 965 controls (45% males) were spouses or partners unaffected by cancer and without a personal family history (to 2<sup>nd</sup> degree relative level) of colorectal neoplasia. Known dominant polyposis syndromes, HNPCC/Lynch syndrome or bi-allelic *MYH* mutation carriers were excluded. All cases and controls were of white UK ethnic origin.



UK2 (NSCCG)<sup>8</sup> consisted of 2,873 CRC cases (58% male, mean age at diagnosis 59.3 years; SD±8.7) ascertained through two ongoing initiatives at the Institute of Cancer Research/Royal Marsden Hospital NHS Trust (RMHNSHT) from 1999 onwards - The National Study of Colorectal Cancer Genetics (NSCCG)<sup>29</sup> and the Royal Marsden Hospital Trust/Institute of Cancer Research Family History and DNA Registry. The 2,871 controls (41% males; mean age 59.8 years; SD±10.8) were the spouses or unrelated friends of patients with malignancies. None had a personal history of malignancy at time of ascertainment. All cases and controls had self-reported European ancestry, and there were no obvious differences in the demography of cases and controls in terms of place of residence within the UK.

VQ58 comprised 1,800 CRC cases (1,099 males, mean age of diagnosis 62.5 years; SD±10.9) from the VICTOR<sup>30</sup> and QUASAR2 ([www.oct-oxford.org.uk/alltrials/trials/q2.html](http://www.oct-oxford.org.uk/alltrials/trials/q2.html)) trials. There were 2,690 population control genotypes (1,391 males,) from the Wellcome Trust Case-Control Consortium 2 (WTCCC2) 1958 birth cohort (also known as the National Child Development Study), which included all births in England, Wales and Scotland during a single week in 1958<sup>31</sup>.

The COIN samples were 2,183 cases derived from the COIN and COIN-B clinical trials of metastatic CRC<sup>32</sup>. Median age was 63 years. COIN cases were compared against genotypes from 2,501 population controls (1,237 males,) from the WTCCC2 National Blood Service (NBS) cohort (50% male; mean age at diagnosis 53.2 years, SD±15.4).

The Colon Cancer Family Registry (CCFR1) data set comprised 1,290 familial CRC cases and 1,055 controls Colon Cancer Family Registry (Colon-CFR) ([http://epi.grants.cancer.gov/CFR/about\\_colon.html](http://epi.grants.cancer.gov/CFR/about_colon.html))<sup>33</sup>. The cases were recently diagnosed CRC cases reported to population complete cancer registries in the USA (Puget Sound, Washington State) who were recruited by the Seattle Familial Colorectal Cancer Registry; in Canada (Ontario) who were recruited by the Ontario Familial Cancer Registry; and in Australia (Melbourne, Victoria) who were recruited by the Australasian

Colorectal Cancer Family Study. Controls were population-based and for this analysis were restricted to those without a family history of colorectal cancer.

UK3 (NSCCG)<sup>8</sup> comprised 7,862 CRC cases (65% male; mean age at diagnosis 59 years, SD±8.2) and 4,431 controls (40% male; mean age 62 years, SD±11.5) ascertained through NSCCG post-2005<sup>29</sup>.

UK4 (CORGI2BCD)<sup>8</sup> consisted of 589 CRC cases (46% male; mean age at diagnosis 58.3 years; SD±14.1) and 1,087 cancer-free population or spouse controls (45% male; mean age 45.1 years, SD±15.9).

Scotland3 (SOCCS)<sup>8</sup> comprised 736 CRC cases (50% male; mean age at diagnosis 53.2 years, SD±15.4) and 1,522 cancer-free population controls (47% male; mean age 51.8 years, SD±11.5). Controls comprised cancer-free participants in the Lothian Birth Cohort 1921 and Lothian Birth Cohort 1936.

Cambridge/SEARCH consisted of 2,248 CRC cases (56% male; mean age at diagnosis 59.2 years, SD±8.1) and 2,288 controls (42% males; mean age 57.6 years; SD±15.1). Samples were ascertained through the SEARCH (Studies of Epidemiology and Risk Factors in Cancer Heredity, <http://www.cancerhelp.org.uk/trials/a-study-looking-at-genetic-causes-of-cancer>) study based in Cambridge, UK. Recruitment started in 2000; initial patient contact was through the general practitioner. Control samples were collected post-2003. Eligible individuals were sex- and frequency-matched in five-year age bands to cases.

In Croatia, the cases (n=375) were recruited during preoperative work-up and individuals coming for a regular follow-up after the surgery for colorectal cancer, at the surgical unit of the University hospital "Sestre Milosrdnice" in Zagreb, Croatia, in the period between 2008-2010. Only individuals with adenocarcinoma were included in this study. Although all recruited cases come to Zagreb for treatment, a substantial proportion

were resident elsewhere in Croatia. Controls (N=1,051) comprised individuals with no malignant disease recruited from the surgical unit of the same hospital and healthy subjects from Split, Croatia. Both Zagreb and Split represent urban centres that attract immigration from other parts of Croatia. Hence both populations are mixed and comprise diverse Croatian subpopulations. Nevertheless, we acknowledge there may be population substructure within Croatian population.

The Helsinki (FCCPS) study (<http://research.med.helsinki.fi/gsb/aaltonen/>) comprised 1,013 cases from a population-based collection centred on south-eastern Finland and 827 population controls from the same collection.

The Swedish study comprised 3,217 CRC patients were recruited within a Swedish national study conducted by the Swedish Low-Risk Colorectal Cancer Study Group. Samples were obtained during 2004-2009 from 14 different surgical clinics in central Sweden. All CRC patients during the study period were eligible for recruitment and were invited to participate. Only those too ill or too frail to consent were excluded. Controls (n=2,895) comprised blood donors from Stockholm and Uppsala. Fully informed consent was obtained in accordance with the Swedish law concerning ethical approval of research on human subjects (refs:2002:489,2003:198,2010:1213-31/4).

The Japanese study comprised 1,583 colorectal cancer cases and 1,898 control subjects as described previously<sup>34</sup>. All cases and controls were obtained from Biobank Japan. These samples were genotyped using the Illumina Human610-QuadBeadChip in cases and the Illumina HumanHap550v3 BeadChip in controls. Exclusion criteria: Samples with a call rate of <0.98, SNP quality call rates <0.95, Hardy-Weinberg  $P < 1.0 \times 10^{-7}$  in controls.

In all cases CRC was defined according to the ninth revision of the International Classification of Diseases (ICD) by codes 153–154.

## 2. ADDITIONAL PCA BASED ANALYSIS

Although no substantial population structure was indicated by analysis of the QQ plots, the Eigenstrat software was utilised to check for the effect of any substructure on the results for the SNPs reported in this paper. Adjusting along the lowest ten principal components and recalculating  $p$ -values showed minimal changes in the association statistics (shown below). It should be noted that the eigenstrat software does not facilitate proper testing of the x-chromosome and the results reported here are based on males being treated as female homozygotes.

**Table of Eigenstrat adjusted  $p$ -values for implicated SNPs (10PCs)**

|             | Inflation ( $\lambda$ ) |      | rs1321311            |                      | rs3824999            |                      | rs5934683            |                      |
|-------------|-------------------------|------|----------------------|----------------------|----------------------|----------------------|----------------------|----------------------|
|             | PRE                     | POST | PRE                  | POST                 | PRE                  | POST                 | PRE                  | POST                 |
| <b>LP1</b>  | 1.02                    | 1.01 | $2.0 \times 10^{-2}$ | $1.8 \times 10^{-2}$ | $4.9 \times 10^{-2}$ | $7.3 \times 10^{-2}$ | $3.3 \times 10^{-4}$ | $4.9 \times 10^{-4}$ |
| <b>SP1</b>  | 1.01                    | 1.00 | $2.4 \times 10^{-2}$ | $1.6 \times 10^{-2}$ | $5.9 \times 10^{-2}$ | $4.4 \times 10^{-2}$ | $5.8 \times 10^{-1}$ | $5.8 \times 10^{-1}$ |
| <b>LP2</b>  | 1.04                    | 1.03 | $7.2 \times 10^{-2}$ | $6.6 \times 10^{-2}$ | $1.7 \times 10^{-2}$ | $1.4 \times 10^{-2}$ | $1.2 \times 10^{-1}$ | $1.2 \times 10^{-1}$ |
| <b>SP2</b>  | 1.03                    | 1.04 | $3.6 \times 10^{-1}$ | $3.4 \times 10^{-1}$ | $2.0 \times 10^{-1}$ | $2.2 \times 10^{-1}$ | $6.5 \times 10^{-2}$ | $8.3 \times 10^{-2}$ |
| <b>VQ</b>   | 1.01                    | 1.01 | $4.8 \times 10^{-1}$ | $5.2 \times 10^{-1}$ | $5.4 \times 10^{-5}$ | $9.2 \times 10^{-5}$ | $9.0 \times 10^{-2}$ | $1.1 \times 10^{-1}$ |
| <b>CFR1</b> | 1.02                    | 1.01 | $1.4 \times 10^{-1}$ | $9.7 \times 10^{-2}$ | $1.9 \times 10^{-2}$ | $2.4 \times 10^{-2}$ | $5.4 \times 10^{-2}$ | $4.6 \times 10^{-2}$ |
